# Supplementary material for: Synthesis and Evaluation of Anticancer Activities of Novel C-28 Guanidine-Functionalized Triterpene Acid Derivatives
Source: PubMed Central journal article supplement (PMC6278366; doi:10.3390/molecules23113000), 2018-11-16

*Supporting Information For*

**Synthesis and evaluation of anticancer activities of novel C-28 guanidine-functionalized triterpene acid derivatives.**

Anna Spivak \*, Rezeda Khalitova, Darya Nedopekina, Lilya Dzhemileva \*, Milyausha Yunusbaeva, Victor Odionkov, Vladimir D'yakonov and Usein Dzhemilev.

*Institute of Petrochemistry and Catalysis, Russian Academy of Sciences, 141 prosp. Oktyabrya, 450075  
Ufa, Russian Federation*

**E-mail:**\* spivak.ink@gmail.com

| <b>Index</b>                                               | <b>Page Number</b> |
|------------------------------------------------------------|--------------------|
| <sup>1</sup> H, <sup>13</sup> C NMR of Compound <b>4</b>   | 3                  |
| <sup>1</sup> H, <sup>13</sup> C NMR of Compound <b>5</b>   | 5                  |
| <sup>1</sup> H, <sup>13</sup> C NMR of Compound <b>6</b>   | 7                  |
| <sup>1</sup> H, <sup>13</sup> C NMR of Compound <b>7</b>   | 9                  |
| <sup>1</sup> H, <sup>13</sup> C NMR of Compound <b>8a</b>  | 11                 |
| <sup>1</sup> H, <sup>13</sup> C NMR of Compound <b>15</b>  | 13                 |
| <sup>1</sup> H, <sup>13</sup> C NMR of Compound <b>18</b>  | 15                 |
| <sup>1</sup> H, <sup>13</sup> C NMR of Compound <b>19</b>  | 17                 |
| <sup>1</sup> H, <sup>13</sup> C NMR of Compound <b>20</b>  | 19                 |
| <sup>1</sup> H, <sup>13</sup> C NMR of Compound <b>21</b>  | 21                 |
| <sup>1</sup> H, <sup>13</sup> C NMR of Compound <b>9</b>   | 23                 |
| <sup>1</sup> H, <sup>13</sup> C NMR of Compound <b>10</b>  | 25                 |
| <sup>1</sup> H, <sup>13</sup> C NMR of Compound <b>11</b>  | 27                 |
| <sup>1</sup> H, <sup>13</sup> C NMR of Compound <b>12</b>  | 29                 |
| <sup>1</sup> H, <sup>13</sup> C NMR of Compound <b>13</b>  | 31                 |
| <sup>1</sup> H, <sup>13</sup> C NMR of Compound <b>15a</b> | 33                 |
| <sup>1</sup> H, <sup>13</sup> C NMR of Compound <b>18a</b> | 35                 |

|                                                                             |    |
|-----------------------------------------------------------------------------|----|
| $^1\text{H}$ , $^{13}\text{C}$ NMR of Compound <b>20a</b>                   | 37 |
| $^1\text{H}$ , $^{13}\text{C}$ , $^{19}\text{F}$ NMR of Compound <b>9a</b>  | 39 |
| $^1\text{H}$ , $^{13}\text{C}$ , $^{19}\text{F}$ NMR of Compound <b>10a</b> | 42 |
| $^1\text{H}$ , $^{13}\text{C}$ , $^{19}\text{F}$ NMR of Compound <b>11a</b> | 45 |
| $^1\text{H}$ , $^{13}\text{C}$ , $^{19}\text{F}$ NMR of Compound <b>12a</b> | 48 |
| $^1\text{H}$ , $^{13}\text{C}$ , $^{19}\text{F}$ NMR of Compound <b>13a</b> | 51 |
| $^1\text{H}$ , $^{13}\text{C}$ , $^{19}\text{F}$ NMR of Compound <b>15b</b> | 54 |
| $^1\text{H}$ , $^{13}\text{C}$ , $^{19}\text{F}$ NMR of Compound <b>18b</b> | 57 |
| $^1\text{H}$ , $^{13}\text{C}$ , $^{19}\text{F}$ NMR of Compound <b>20b</b> | 60 |
| $^1\text{H}$ , $^{13}\text{C}$ NMR of Compound <b>9b</b>                    | 63 |
| $^1\text{H}$ , $^{13}\text{C}$ NMR of Compound <b>10b</b>                   | 65 |
| $^1\text{H}$ , $^{13}\text{C}$ NMR of Compound <b>11b</b>                   | 67 |
| $^1\text{H}$ , $^{13}\text{C}$ NMR of Compound <b>12b</b>                   | 69 |
| $^1\text{H}$ , $^{13}\text{C}$ NMR of Compound <b>15c</b>                   | 71 |
| $^1\text{H}$ , $^{13}\text{C}$ NMR of Compound <b>18c</b>                   | 73 |
| $^1\text{H}$ , $^{13}\text{C}$ NMR of Compound <b>20c</b>                   | 75 |
| $^1\text{H}$ , $^{13}\text{C}$ NMR of Compound <b>14</b>                    | 77 |

N-(4-aminobutyl)-3-oxolupane-28-amide (4). <sup>1</sup>H NMR spectra (CDCl<sub>3</sub>)

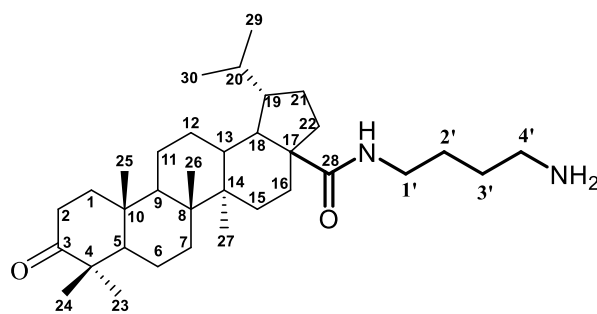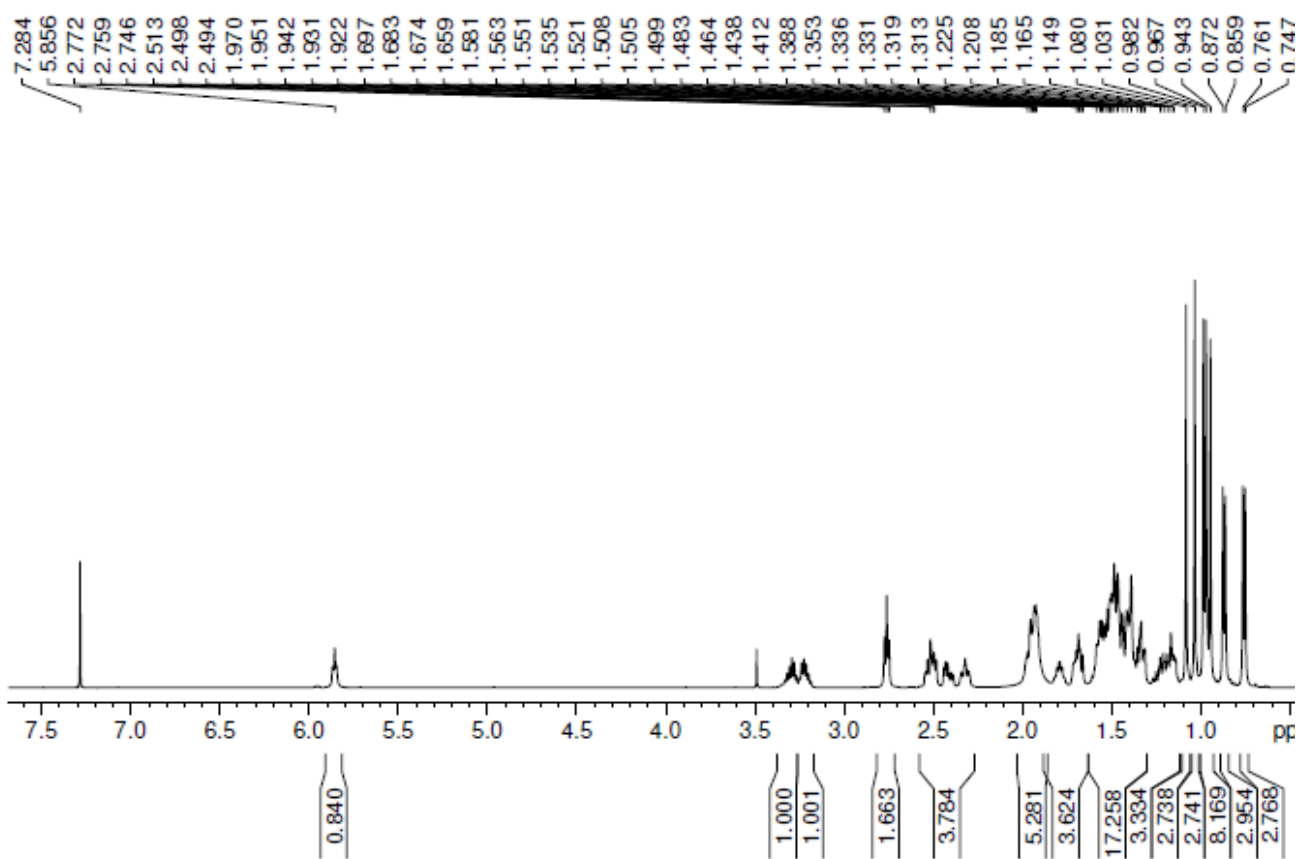

**N-(4-aminobutyl)-3-oxolupane-28-amide (4).**  $^{13}\text{C}$  NMR spectra ( $\text{CDCl}_3$ )

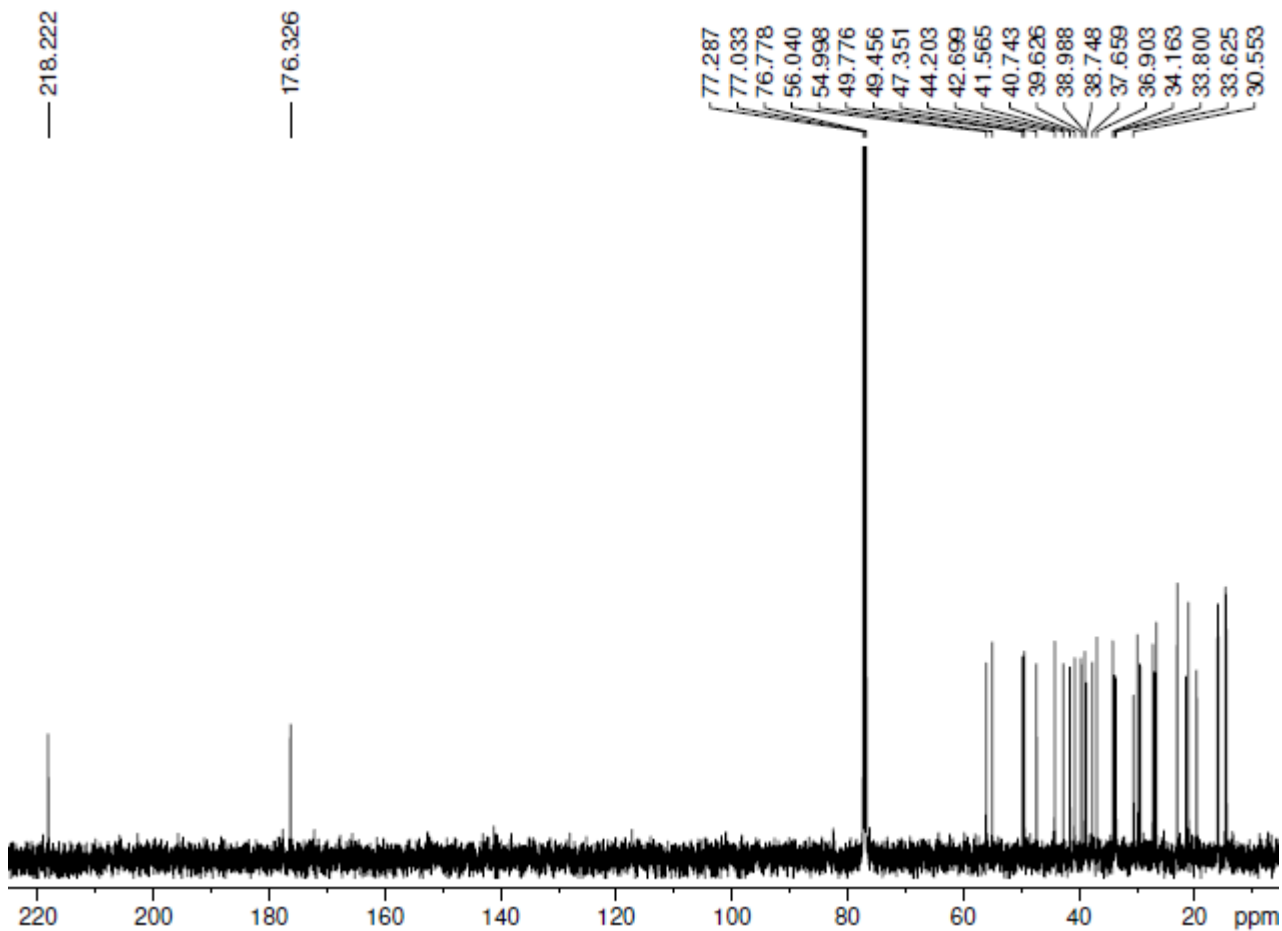

**3 $\beta$ -N-(2-aminoethyl)-3-O-acetyl-lupane-28-amide (5).**  $^1\text{H}$  NMR spectra ( $\text{CDCl}_3$ )

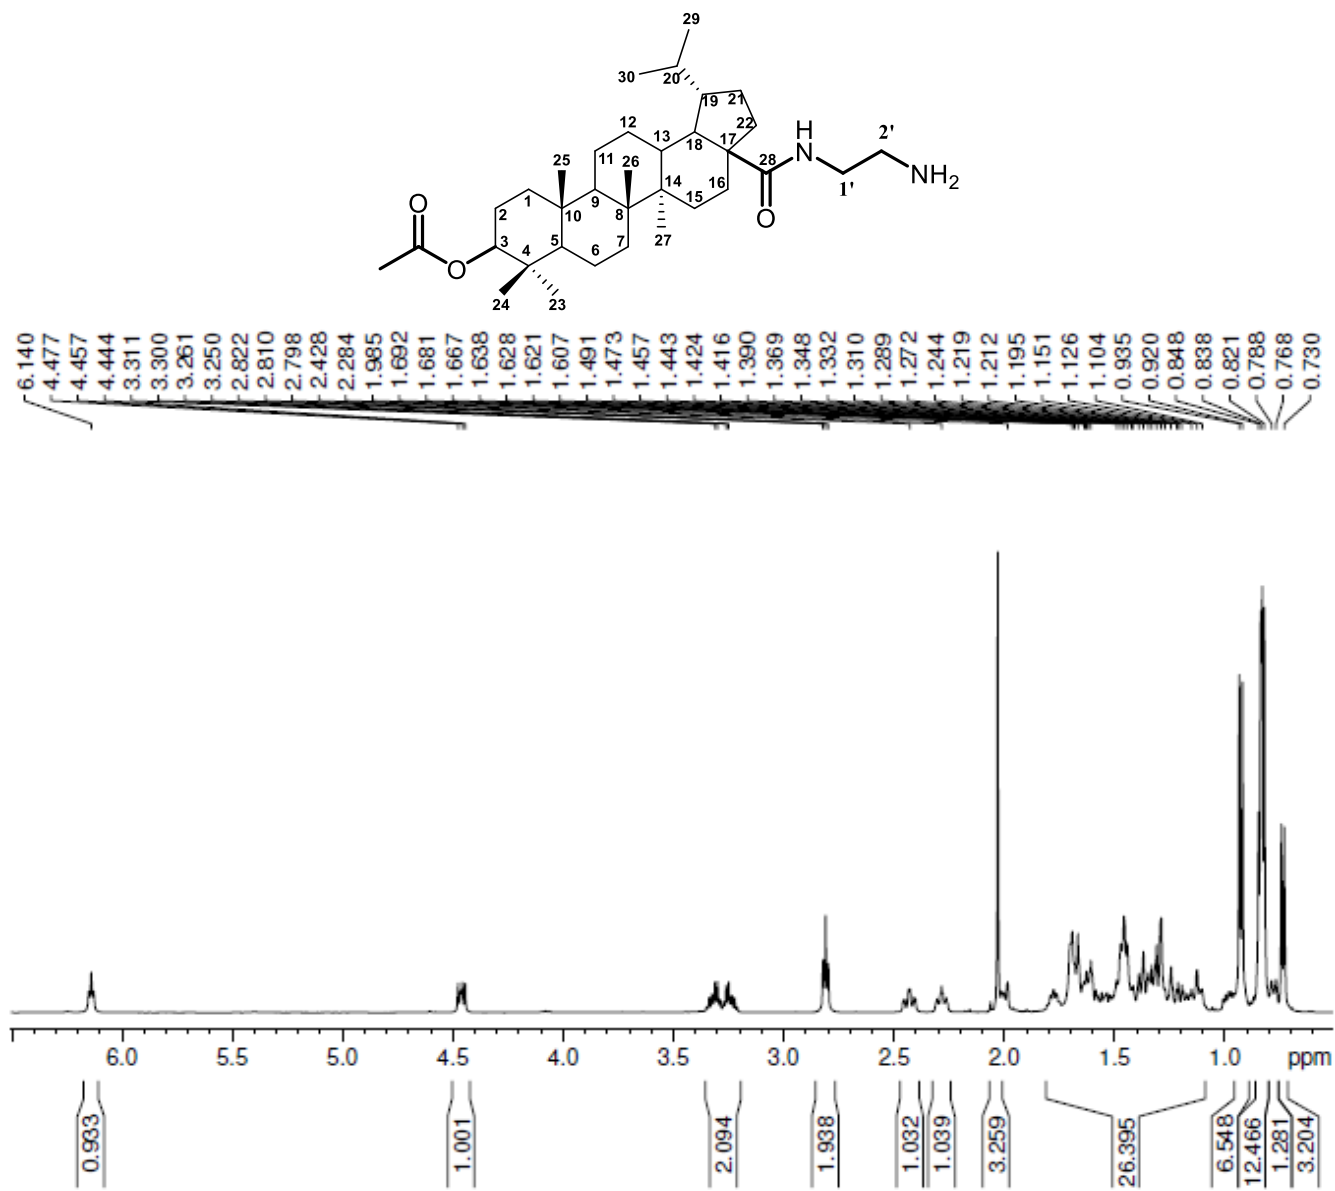

**3 $\beta$ -N-(2-aminoethyl)-3-O-acetyl-lupane-28-amide (5).**  $^{13}\text{C}$  NMR spectra ( $\text{CDCl}_3$ )

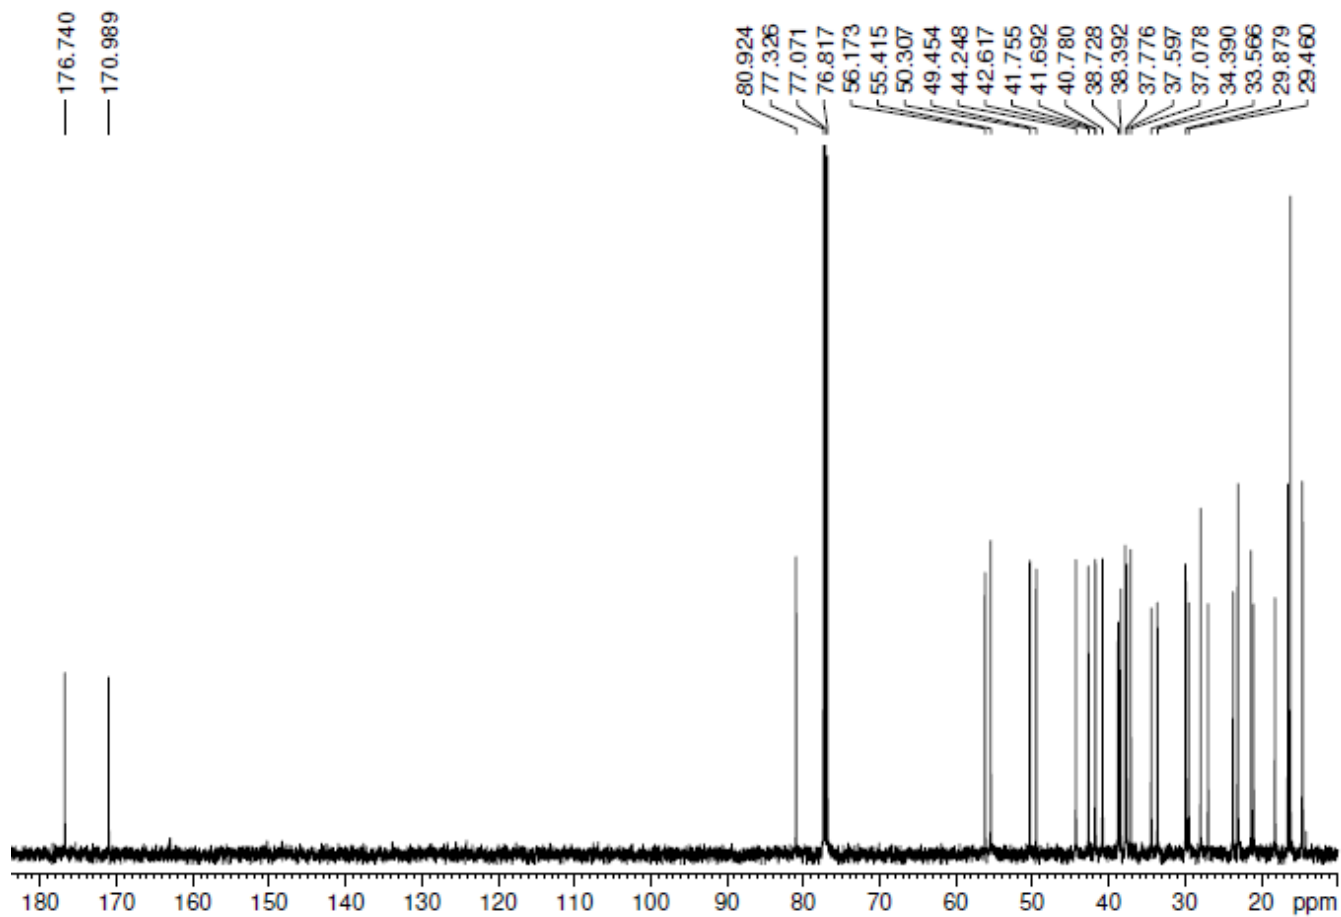

**3 $\beta$ -N-(4-aminobutyl)-3-O-acetyl-lupane-28-amide (6)**  $^1\text{H}$  NMR spectra ( $\text{CDCl}_3$ )

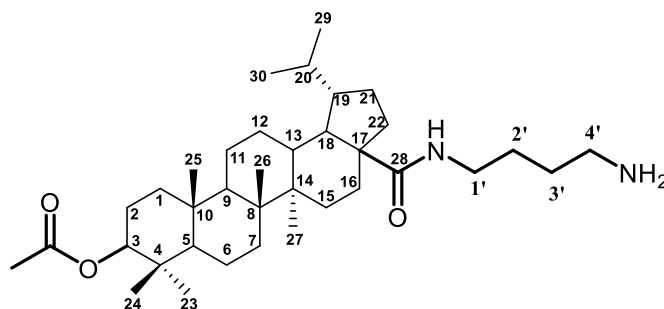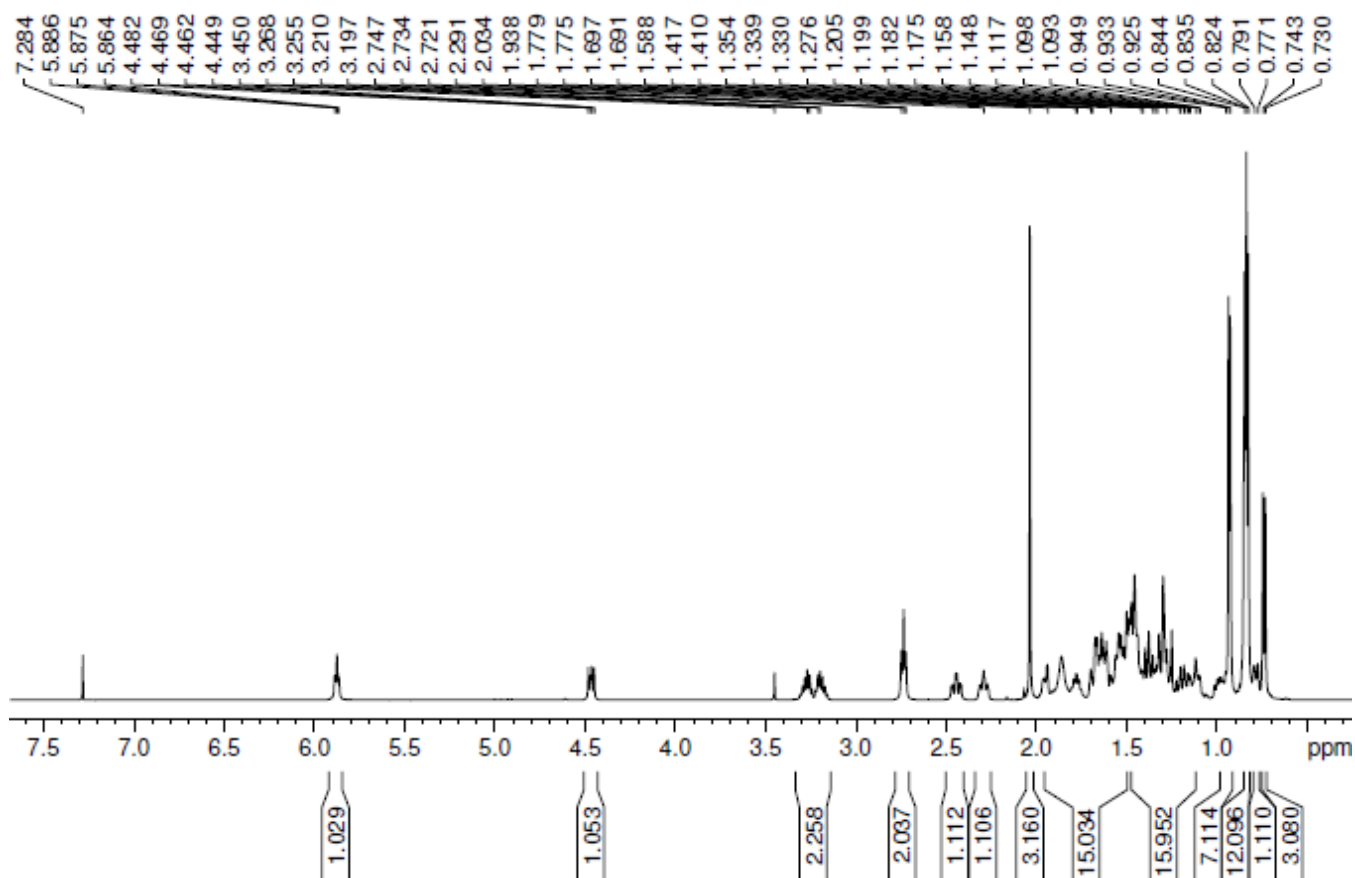

**3 $\beta$ -N-(4-aminobutyl)-3-O-acetyl-lupane-28-amide (6)** <sup>13</sup>C NMR spectra (CDCl<sub>3</sub>)

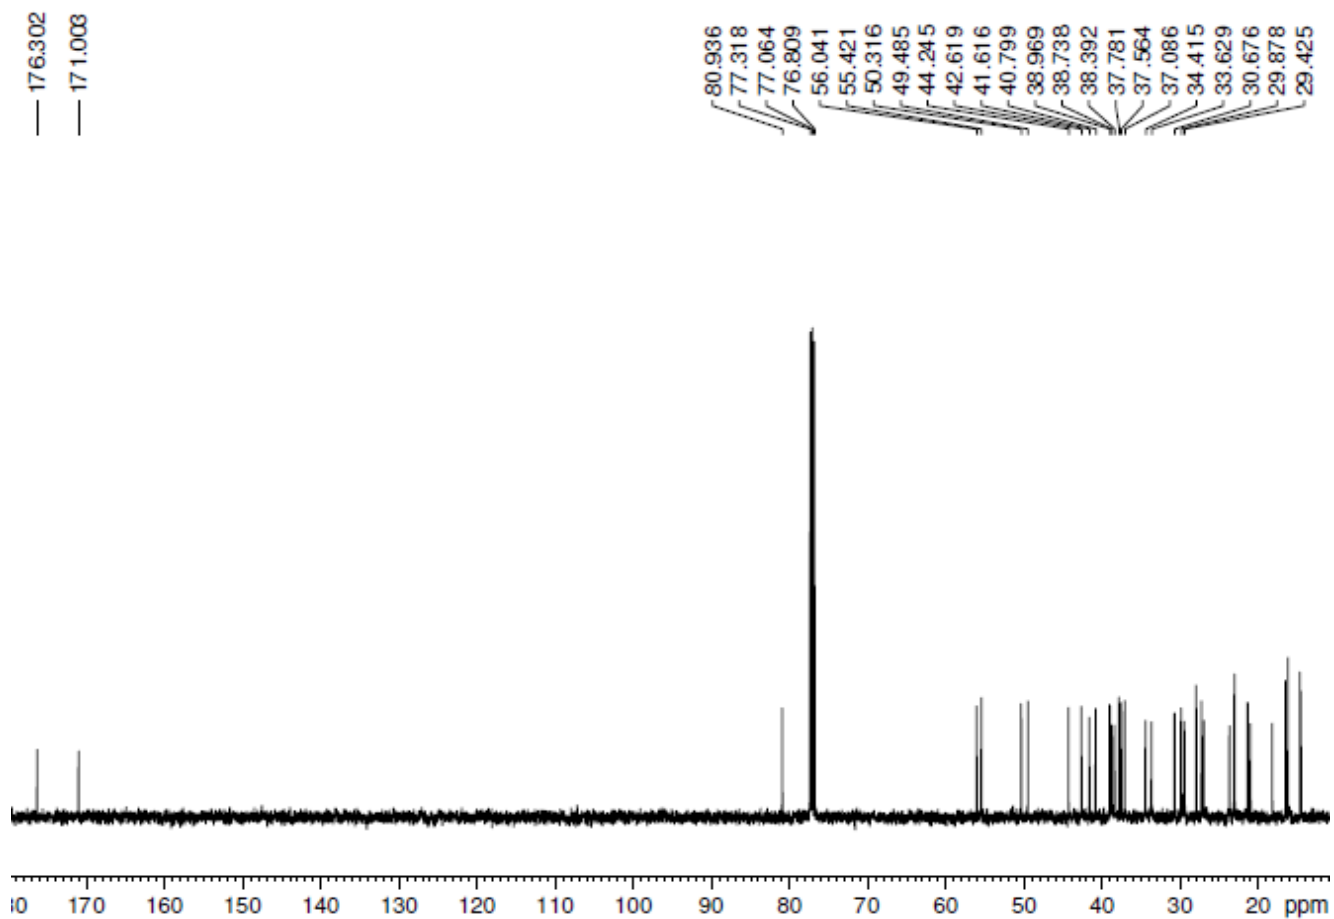



3 $\beta$ -N-[2-(N,N'-bis-aminoethyl)-aminoethyl]-3-O-acetyl-lupane-28-amide (7).

<sup>1</sup>H NMR spectra (MeOD)

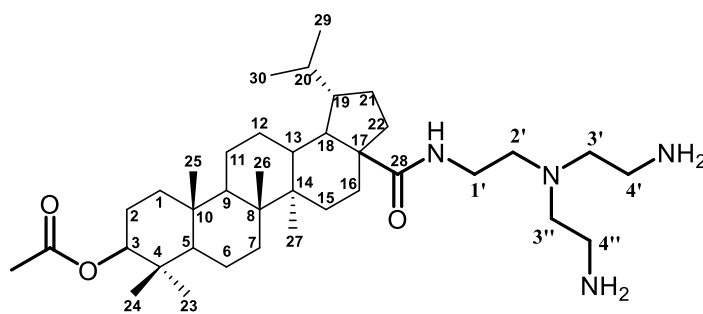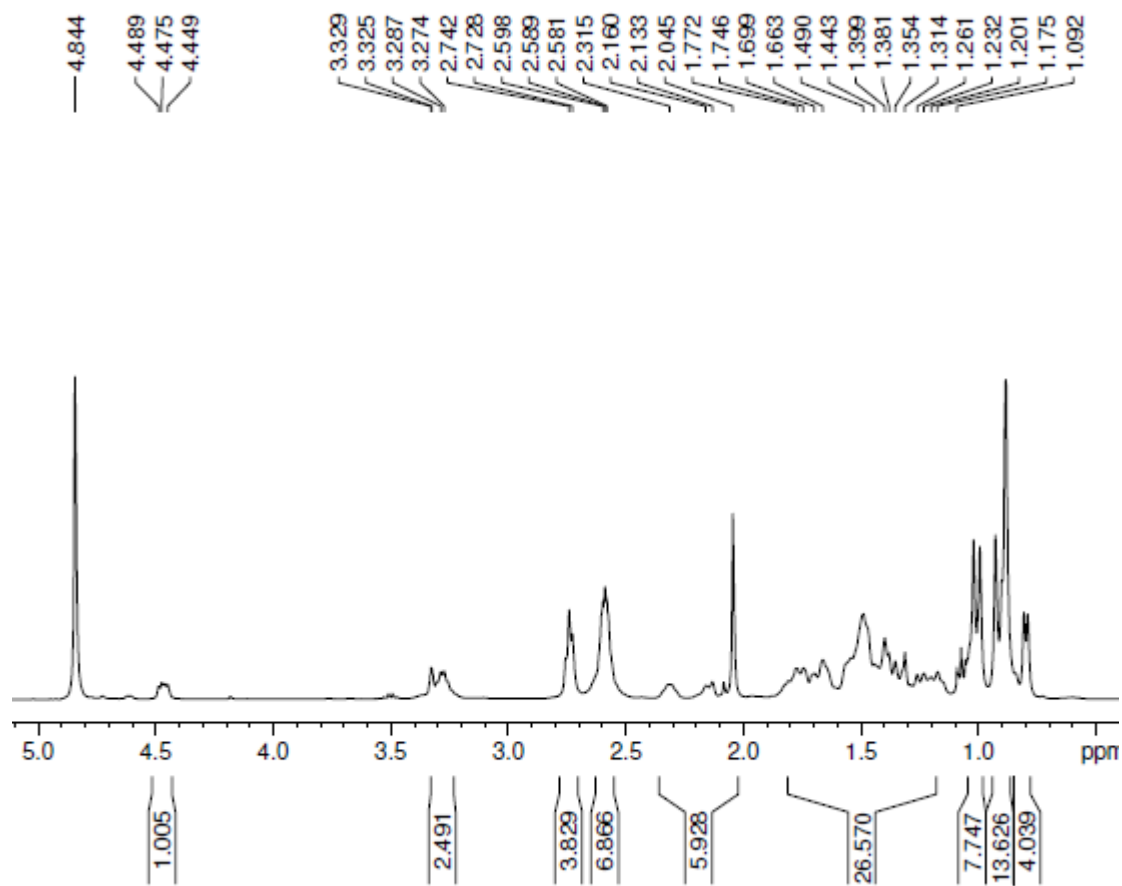

**3 $\beta$ -N-[2-(N,N'-bis-aminoethyl)-aminoethyl]-3-O-acetyl-lupane-28-amide (7).**

<sup>13</sup>C NMR spectra (MeOD)

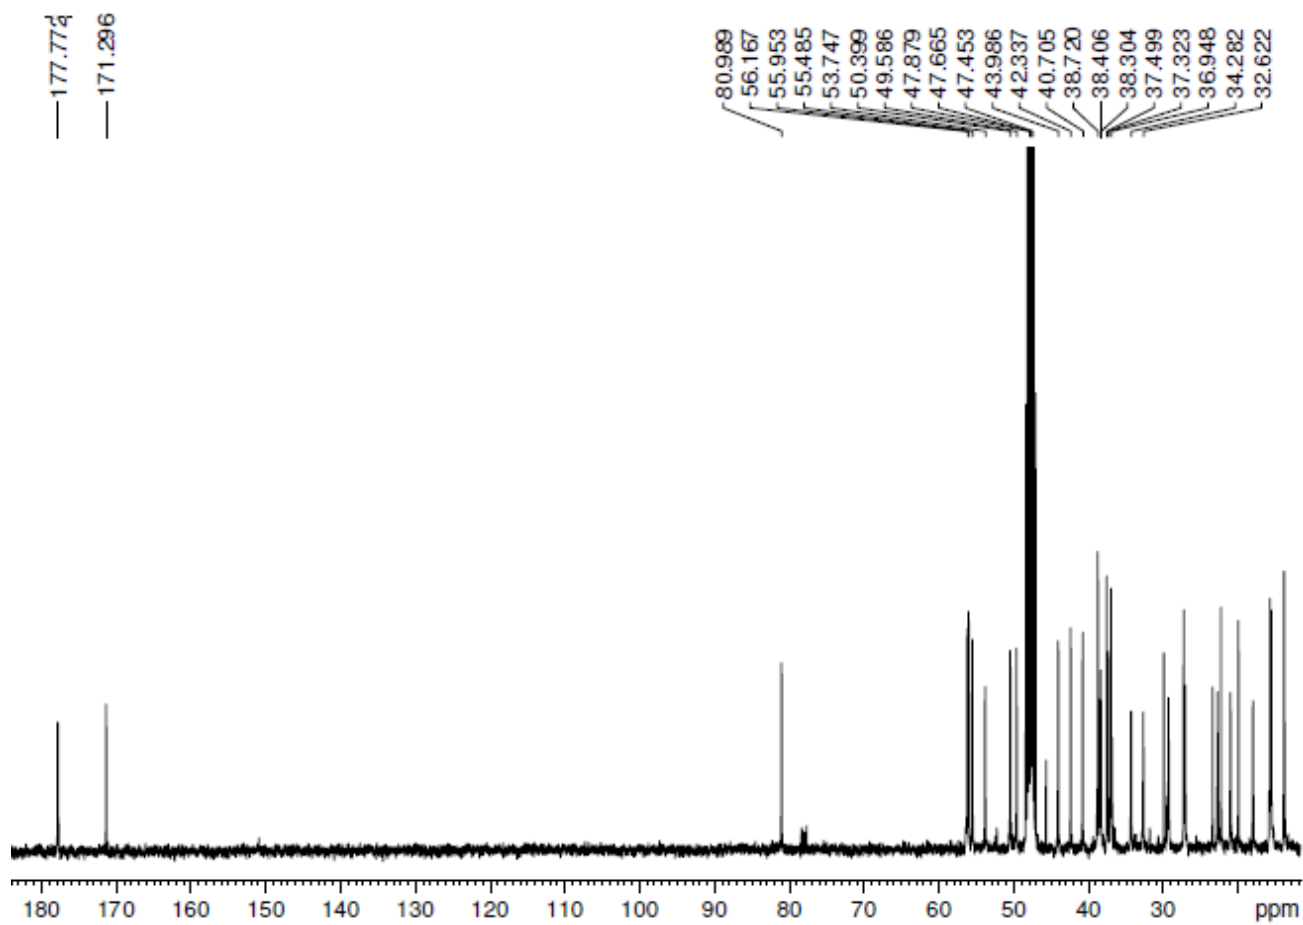

**3 $\beta$ -N-[[3-(3-aminopropyl)piperazinyl]propyl]-3-O-acetyl-lupane-28-amide (8a).**

<sup>1</sup>H NMR spectra (CDCl<sub>3</sub>)

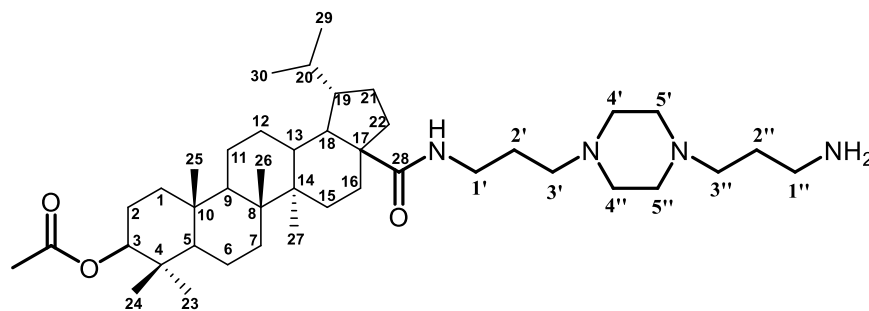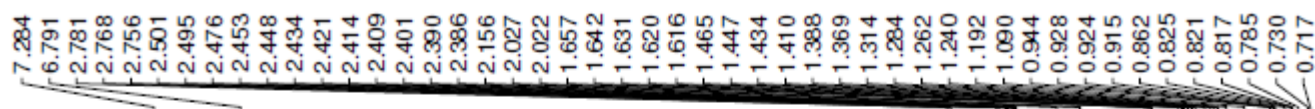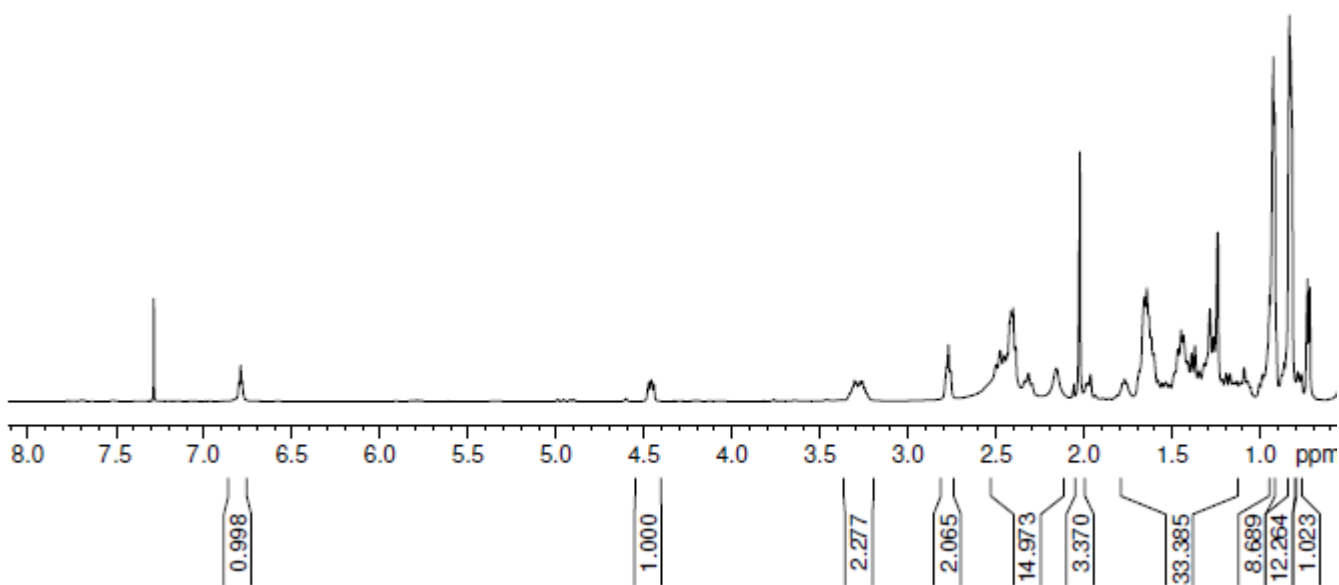

**3 $\beta$ -N-[[3-(3-aminopropyl)piperazinyl]propyl]-3-O-acetyl-lupane-28-amide (8a).**

$^{13}\text{C}$  NMR spectra ( $\text{CDCl}_3$ )

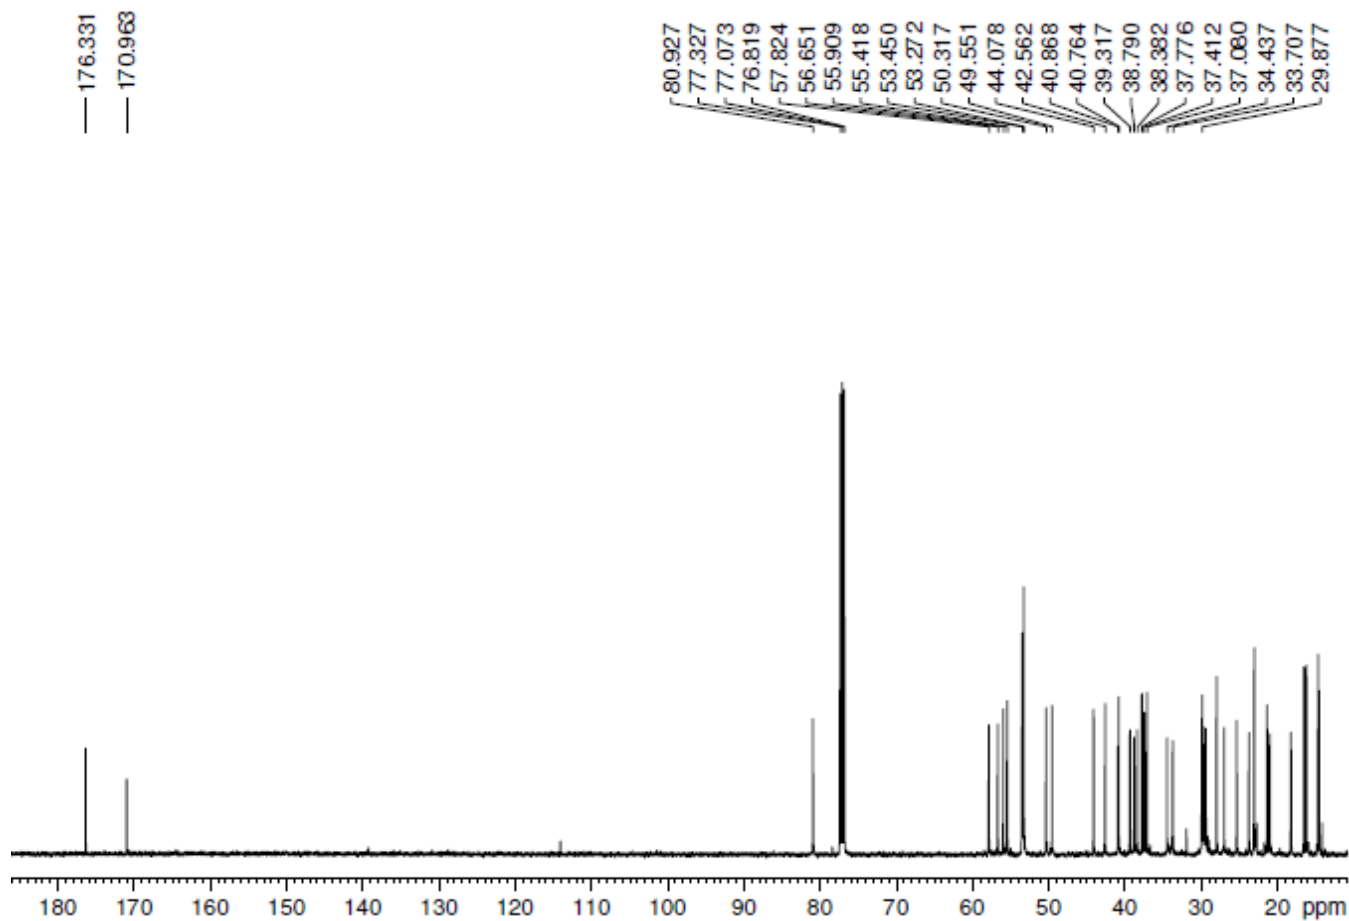

**3 $\beta$ -[2-amino-3-hydroxy-2-(hydroxymethyl)propyl]-3-O-acetyl -lupane-28-oate (15).**

<sup>1</sup>H NMR spectra (CDCl<sub>3</sub>)

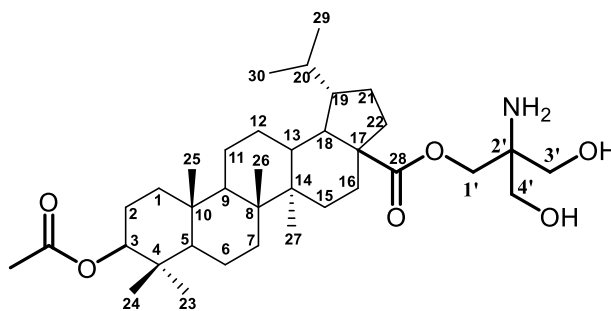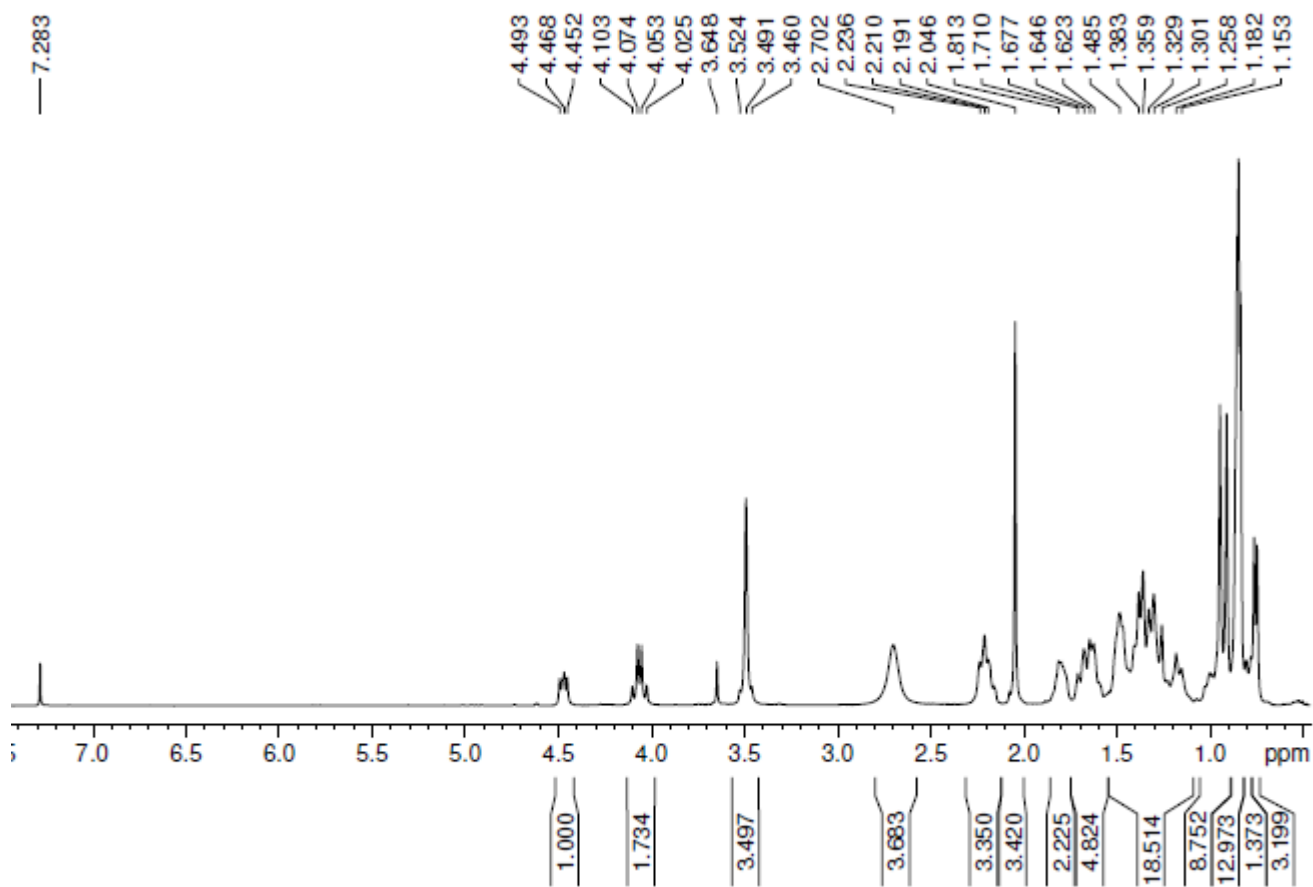

**3 $\beta$ -[2-amino-3-hydroxy-2-(hydroxymethyl)propyl]-3-O-acetyl -lupane-28-oate (15).**

<sup>13</sup>C NMR spectra (CDCl<sub>3</sub>)

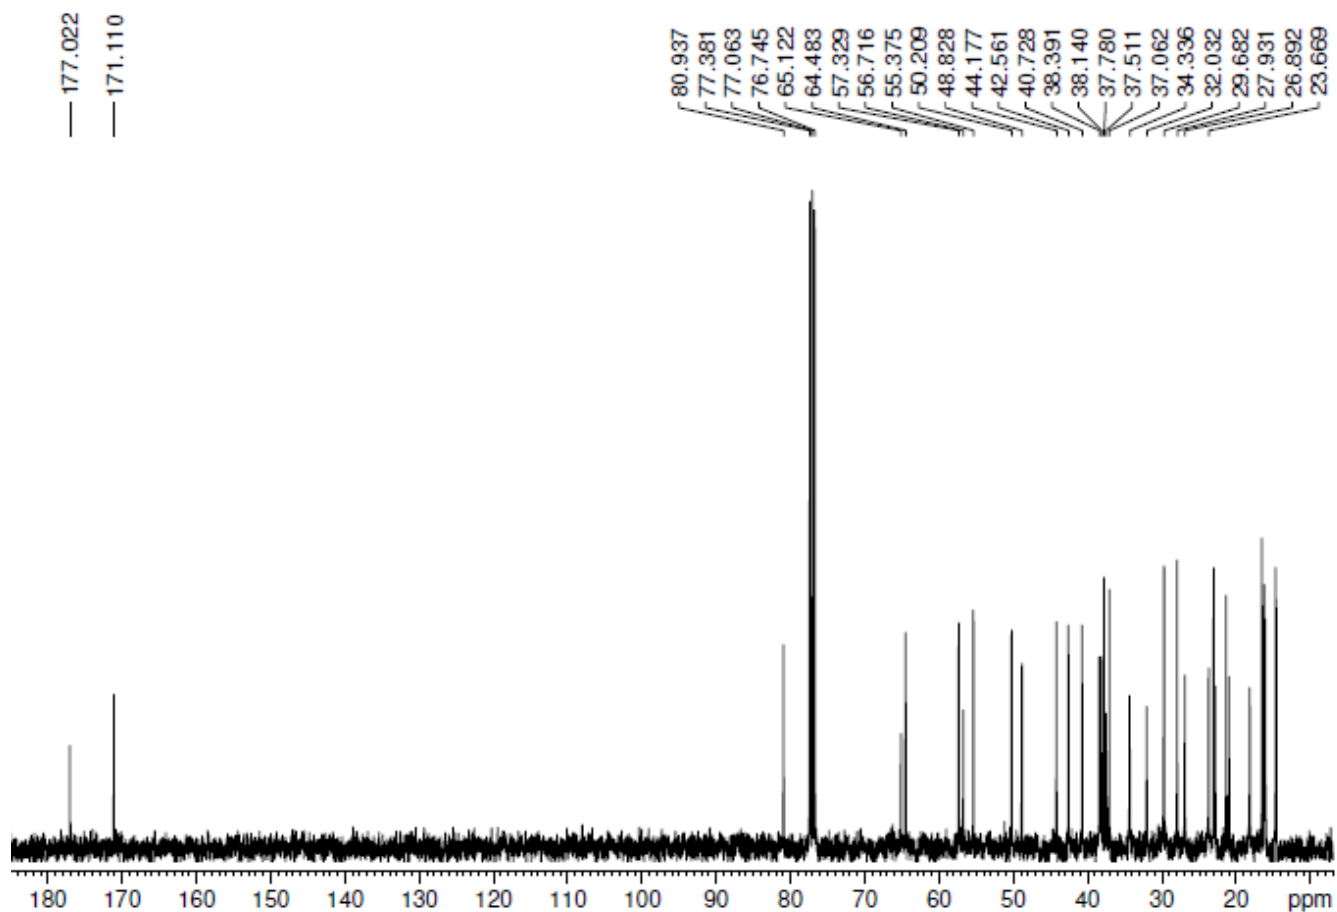

**3 $\beta$ -[2-amino-3-hydroxy-2-(hydroxymethyl)propyl]-3-O-acetylurs-12-en-28-oate (18).**

$^1\text{H}$  NMR spectra ( $\text{CDCl}_3$ )

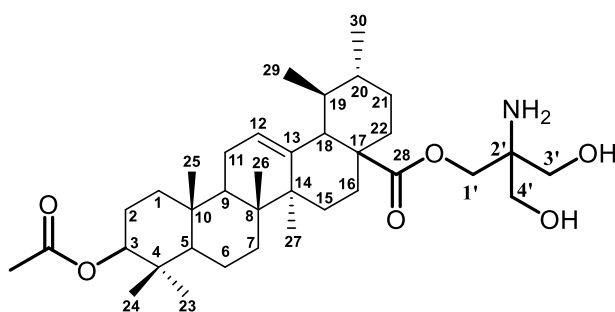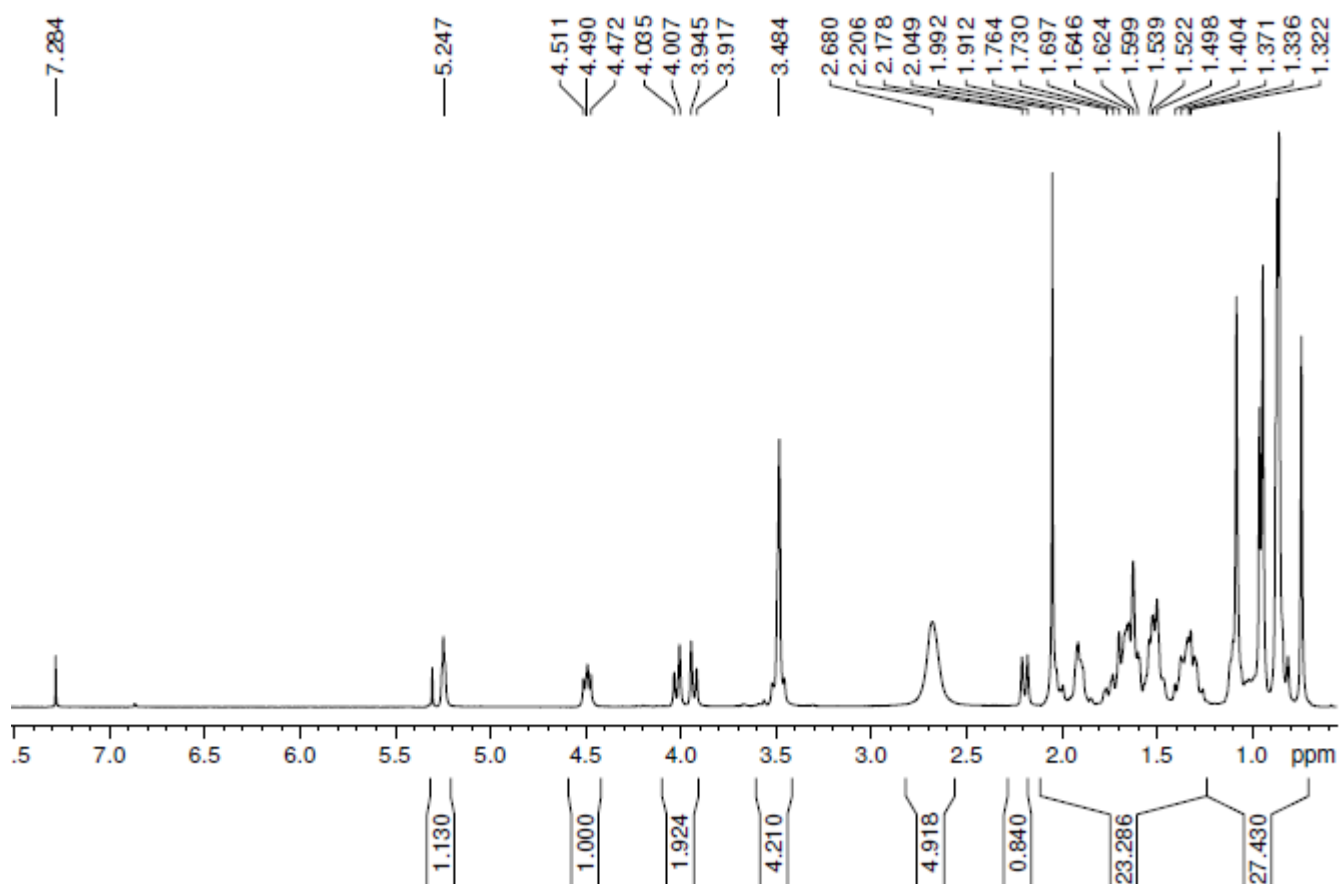

**3 $\beta$ -[2-amino-3-hydroxy-2-(hydroxymethyl)propyl]-3-O-acetylurs-12-en-28-oate (18).**

<sup>13</sup>C NMR spectra (CDCl<sub>3</sub>)

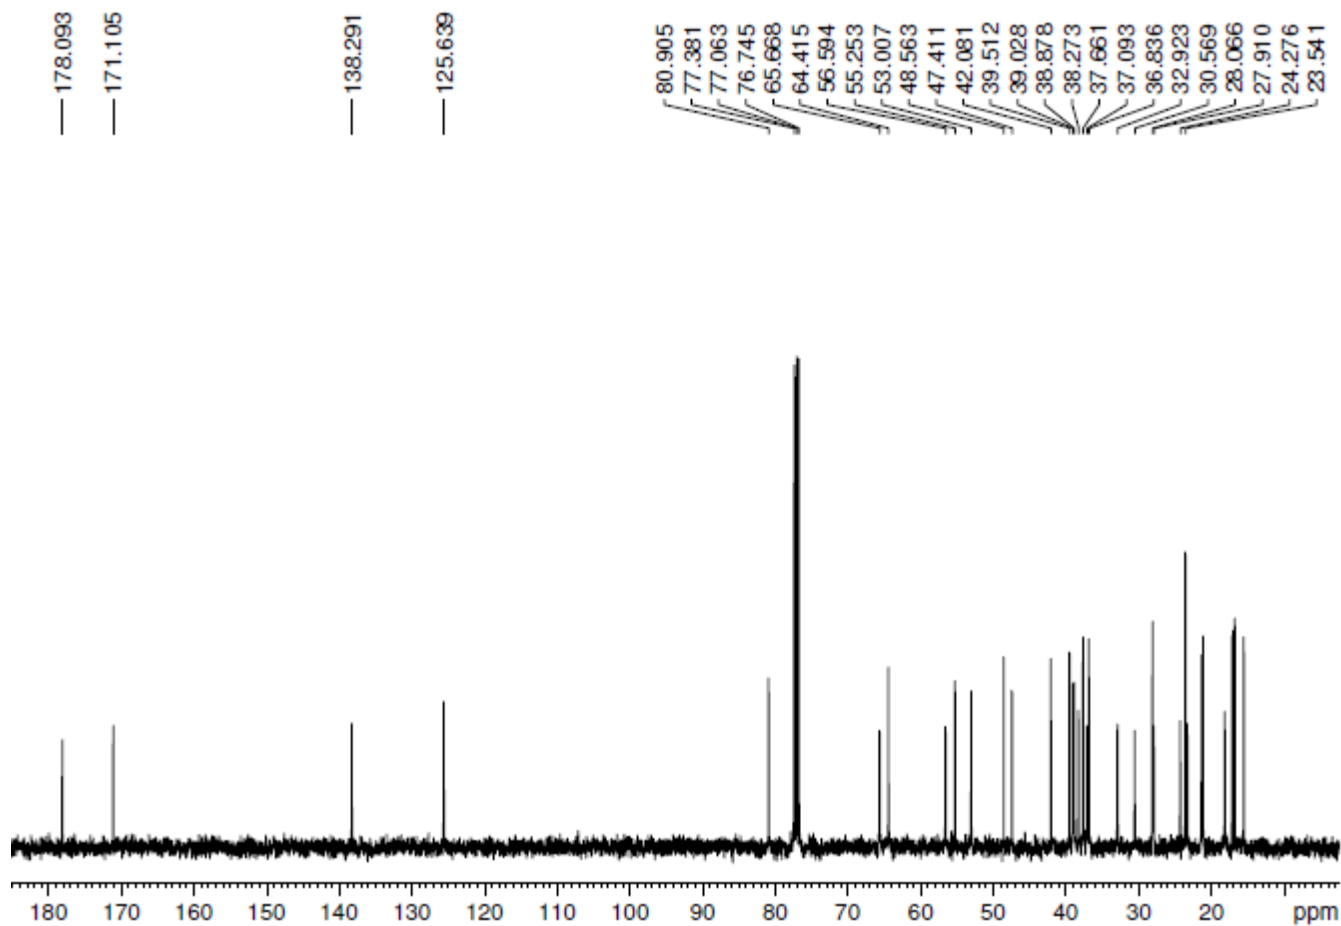



3 $\beta$ -N-[(1',1',1'-tris-hidroxymethyl)methyl]-3-O-acetyl-ursolamide (19)

$^1\text{H}$  NMR spectra (MeOD)

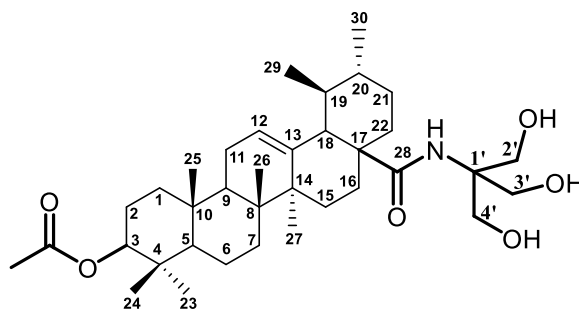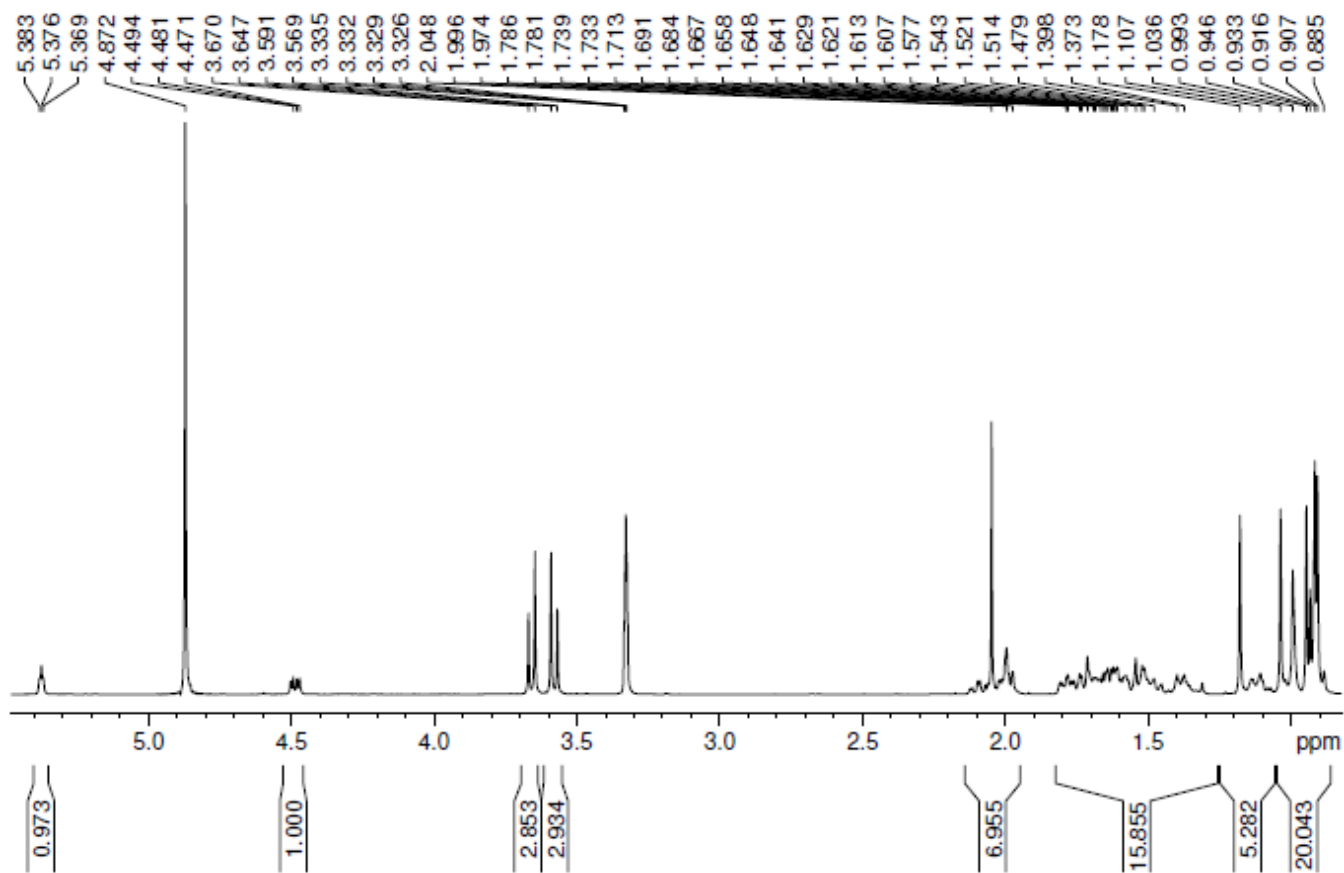

**3 $\beta$ -N-[(1',1',1'-tris-hidroxymethyl)methyl]-3-O-acetyl-ursolamide (19)**

<sup>13</sup>C NMR spectra (d5-DMSO)

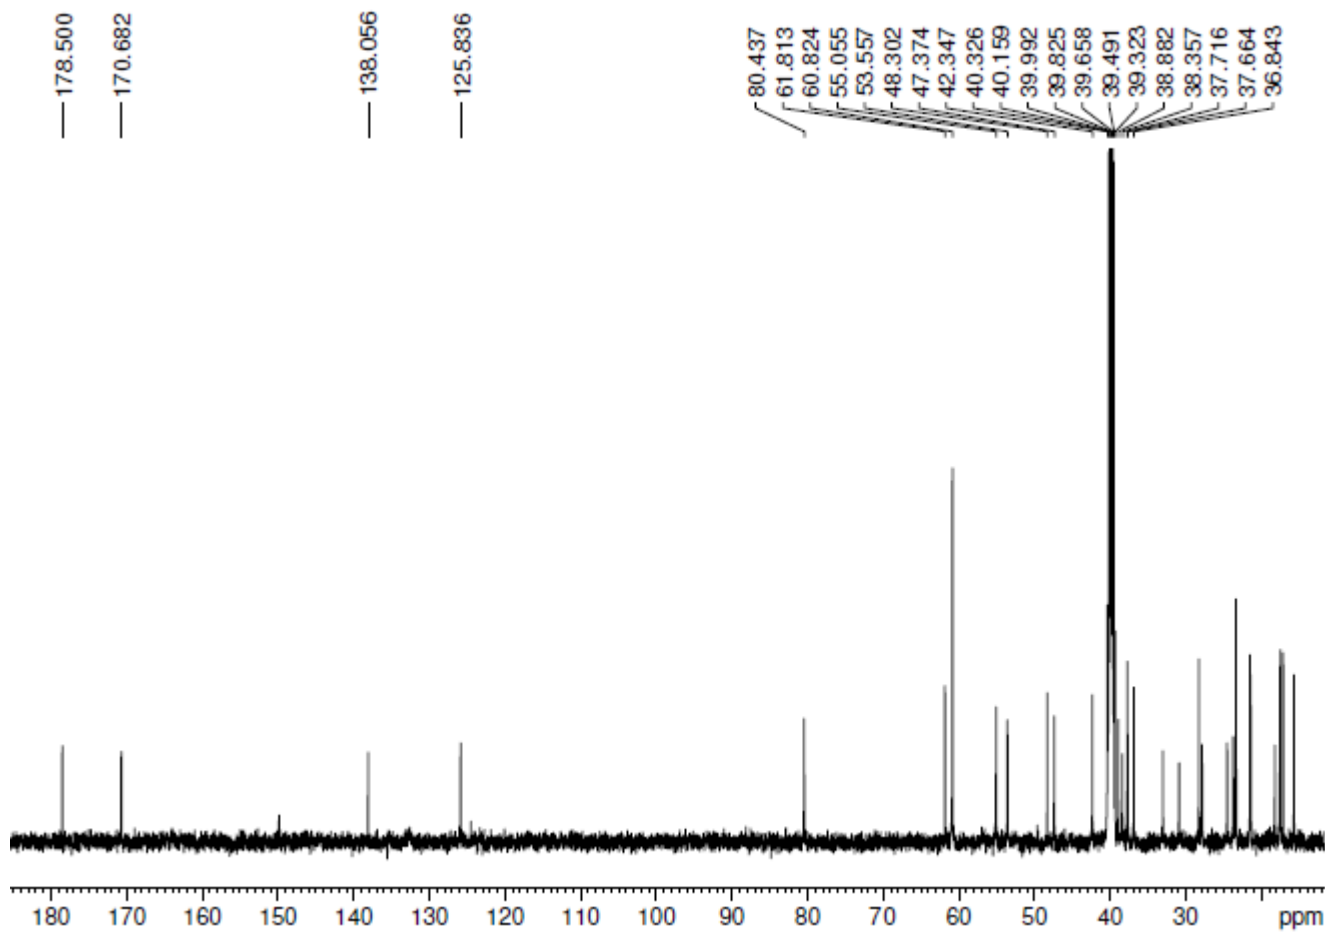

**3 $\beta$ -[2-amino-3-hydroxy-2(hydroxymethyl)propyl]-3-O-acetylolean-12-en-28-oate (20).**

$^1\text{H}$  NMR spectra ( $\text{CDCl}_3$ )

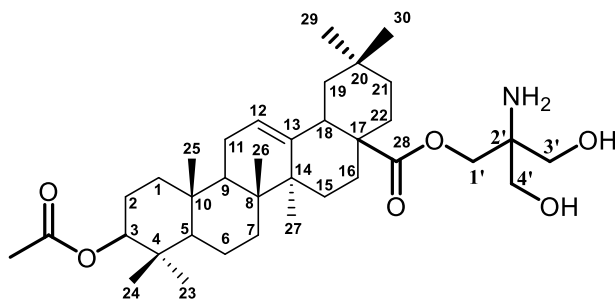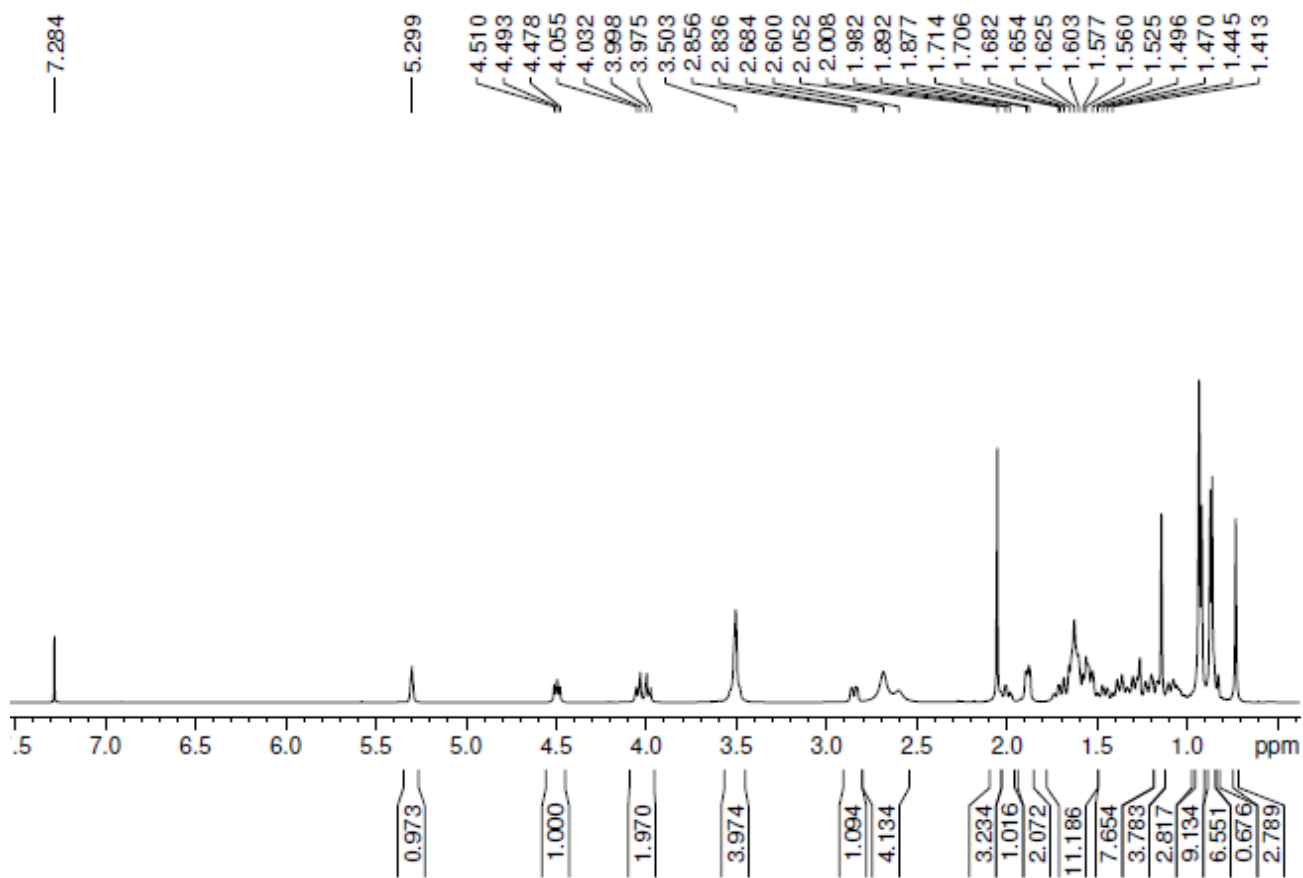

**3 $\beta$ -[2-amino-3-hydroxy-2(hydroxymethyl)propyl]-3-O-acetylolean-12-en-28-oate (20).**

<sup>13</sup>C NMR spectra (CDCl<sub>3</sub>)

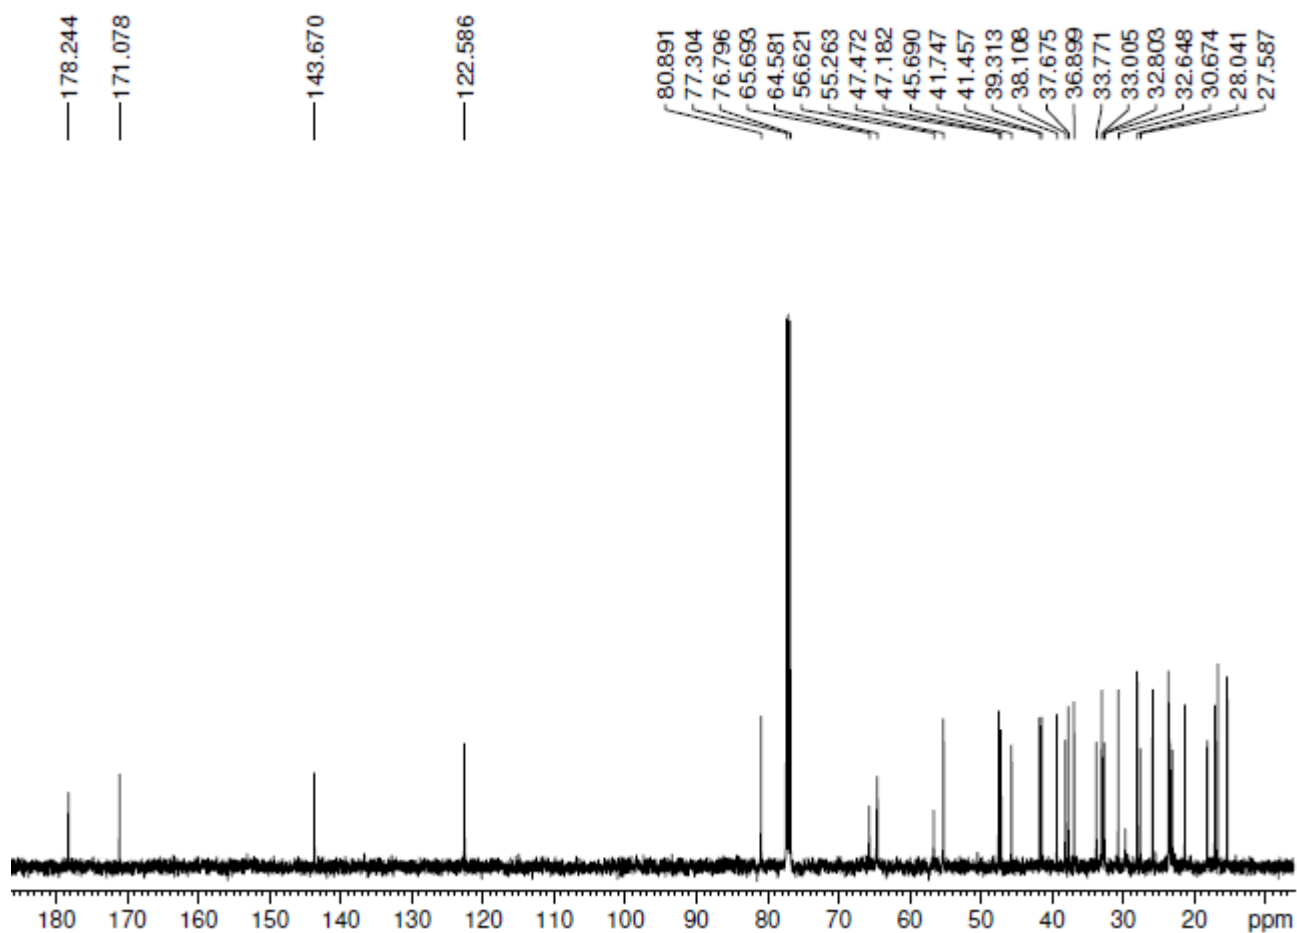

3 $\beta$ -N-[(1',1',1'-tris-hidroxymethyl)methyl]-3-O-acetyl-oleanamide (21)

<sup>1</sup>H NMR spectra (d<sub>6</sub>-DMSO)

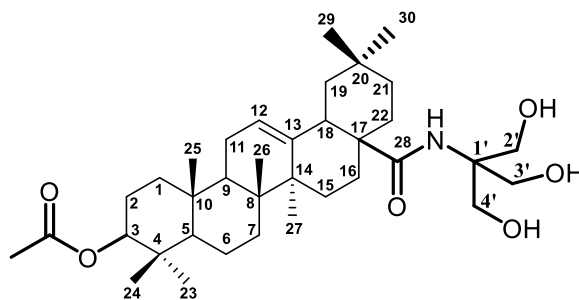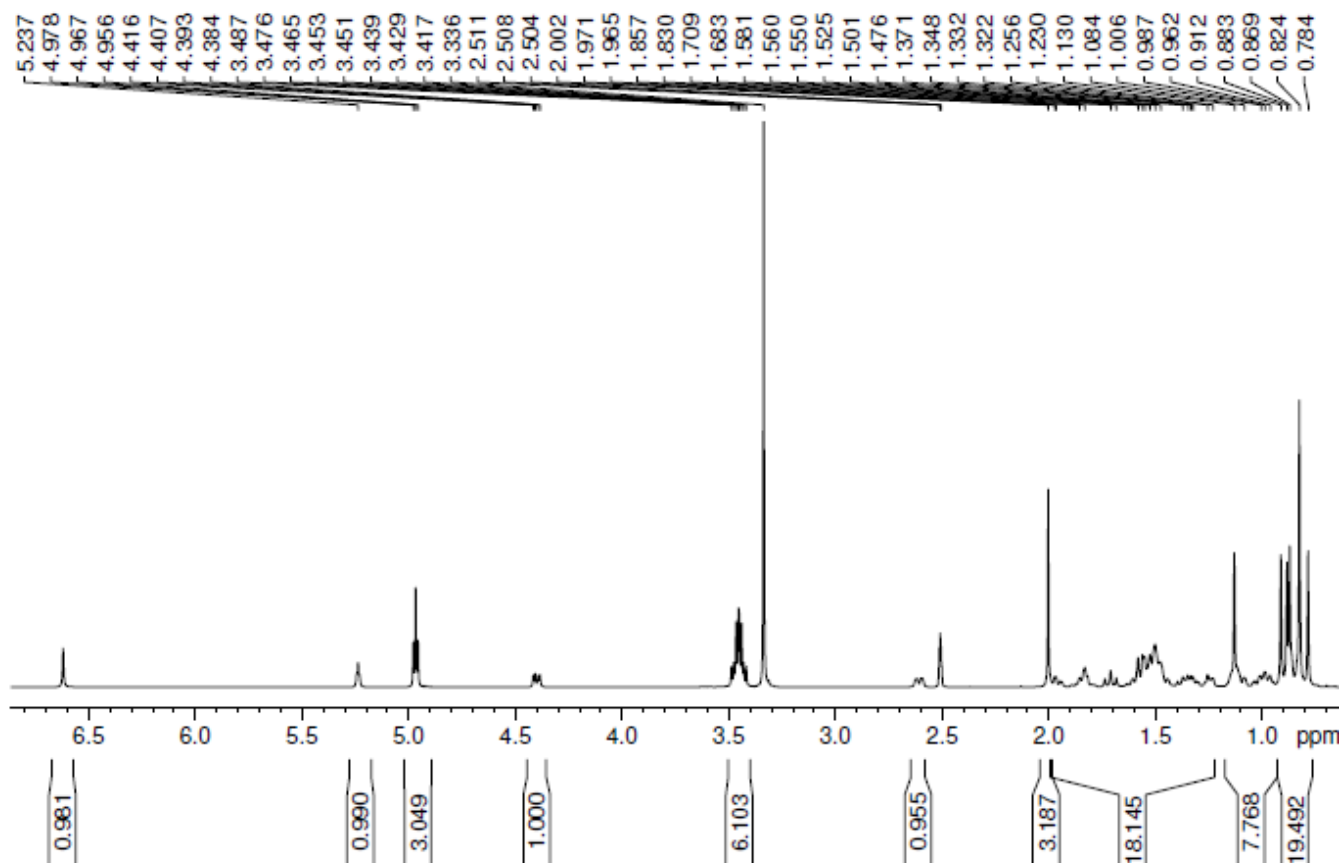

**3 $\beta$ -N-[(1',1',1'-tris-hidroxymethyl)methyl]-3-O-acetyl-oleanamide (21)**

<sup>13</sup>C NMR spectra (d<sub>6</sub>-DMSO)

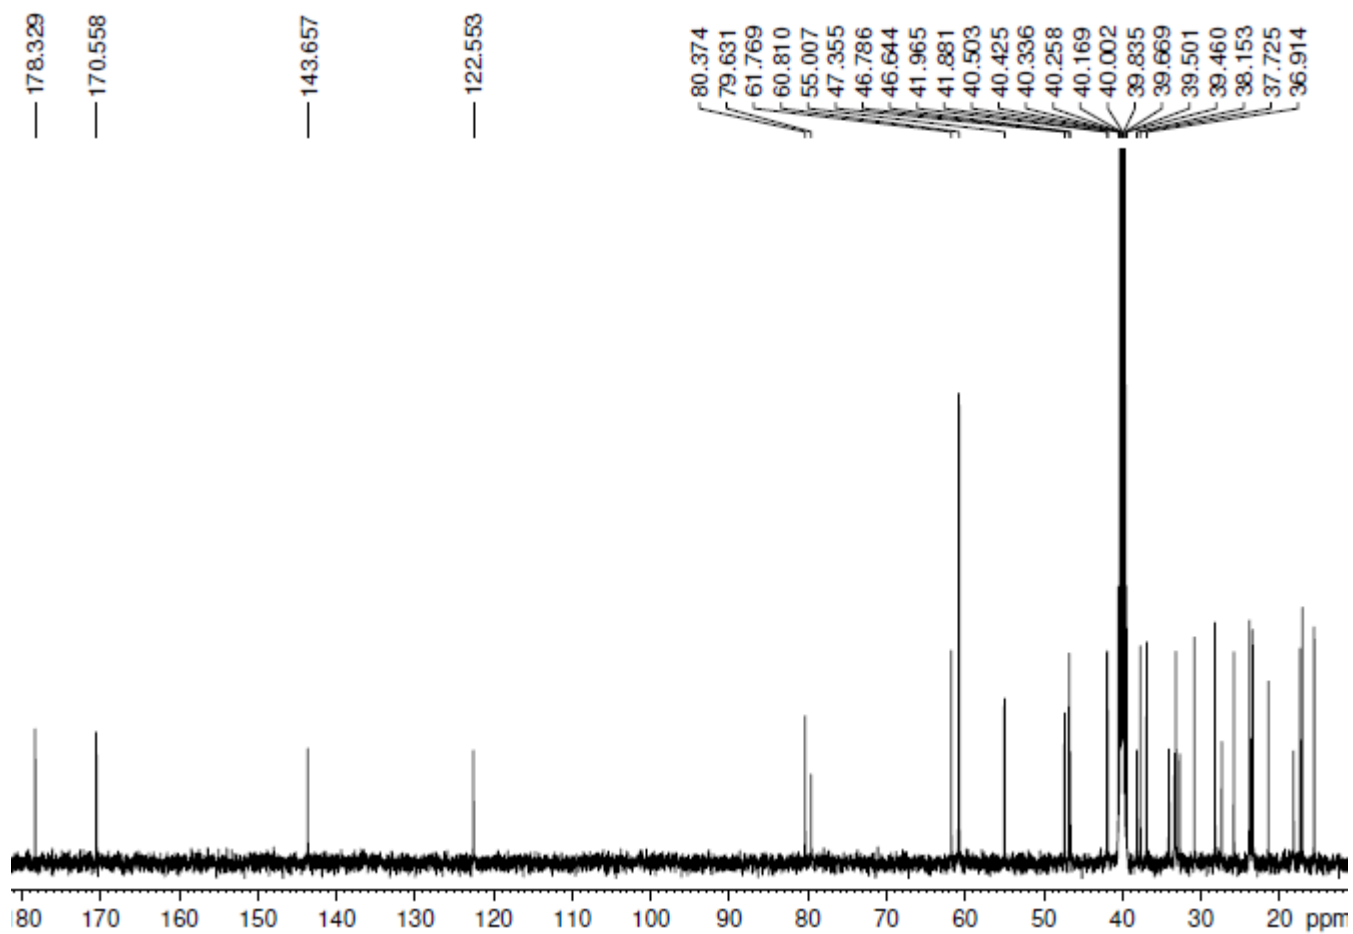

N-[4-tert-butyloxycarbonyl buthylguanidine]-3-oxo-lupane-28-amide (9)

<sup>1</sup>H NMR spectra (CDCl<sub>3</sub>)

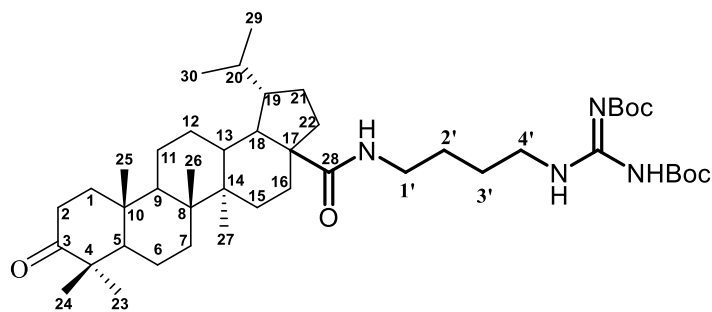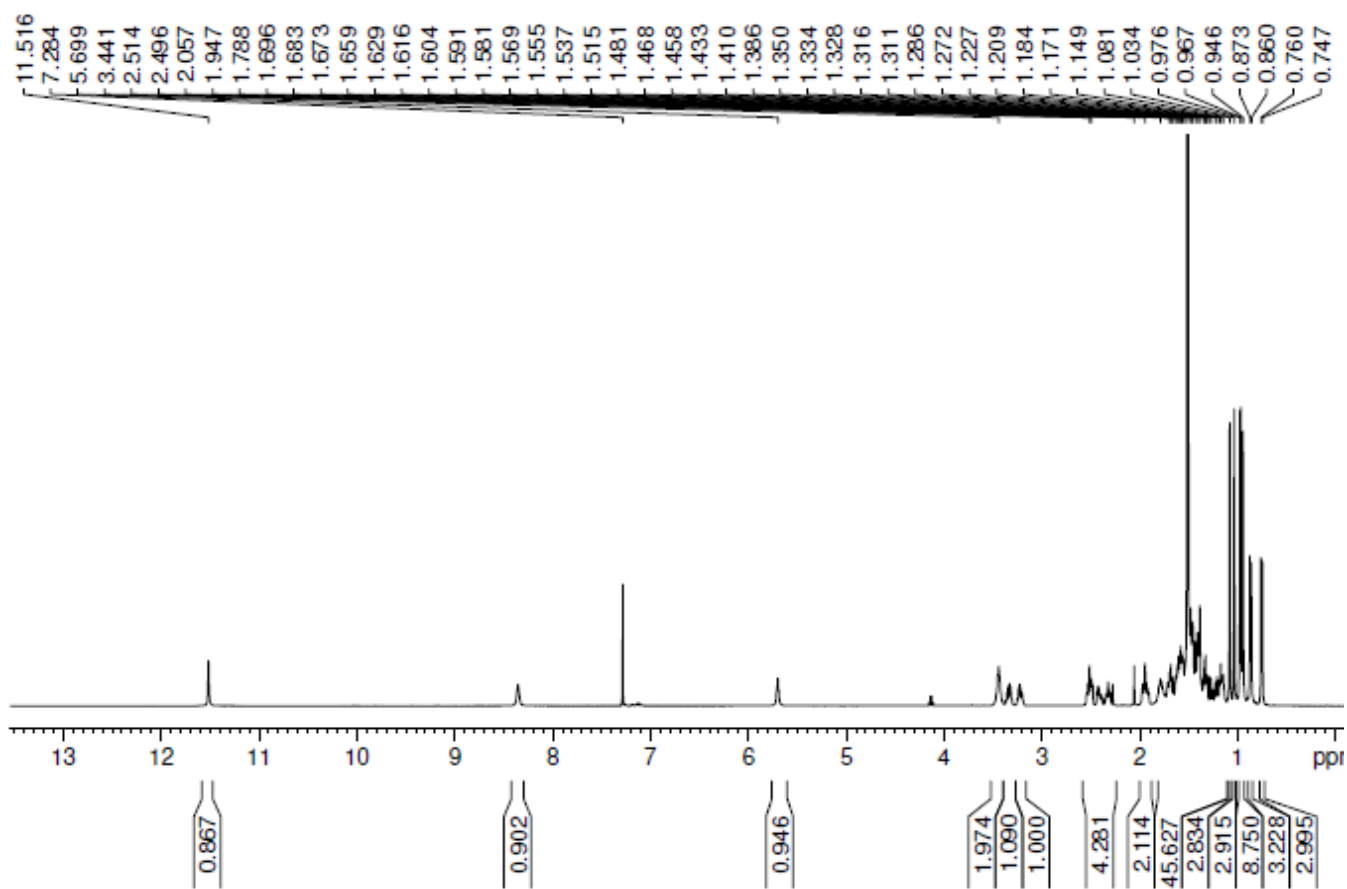

N-[4-tert-butyloxycarbonyl buthylguanidine]-3-oxo-lupane-28-amide (9)

$^{13}\text{C}$  NMR spectra ( $\text{CDCl}_3$ )

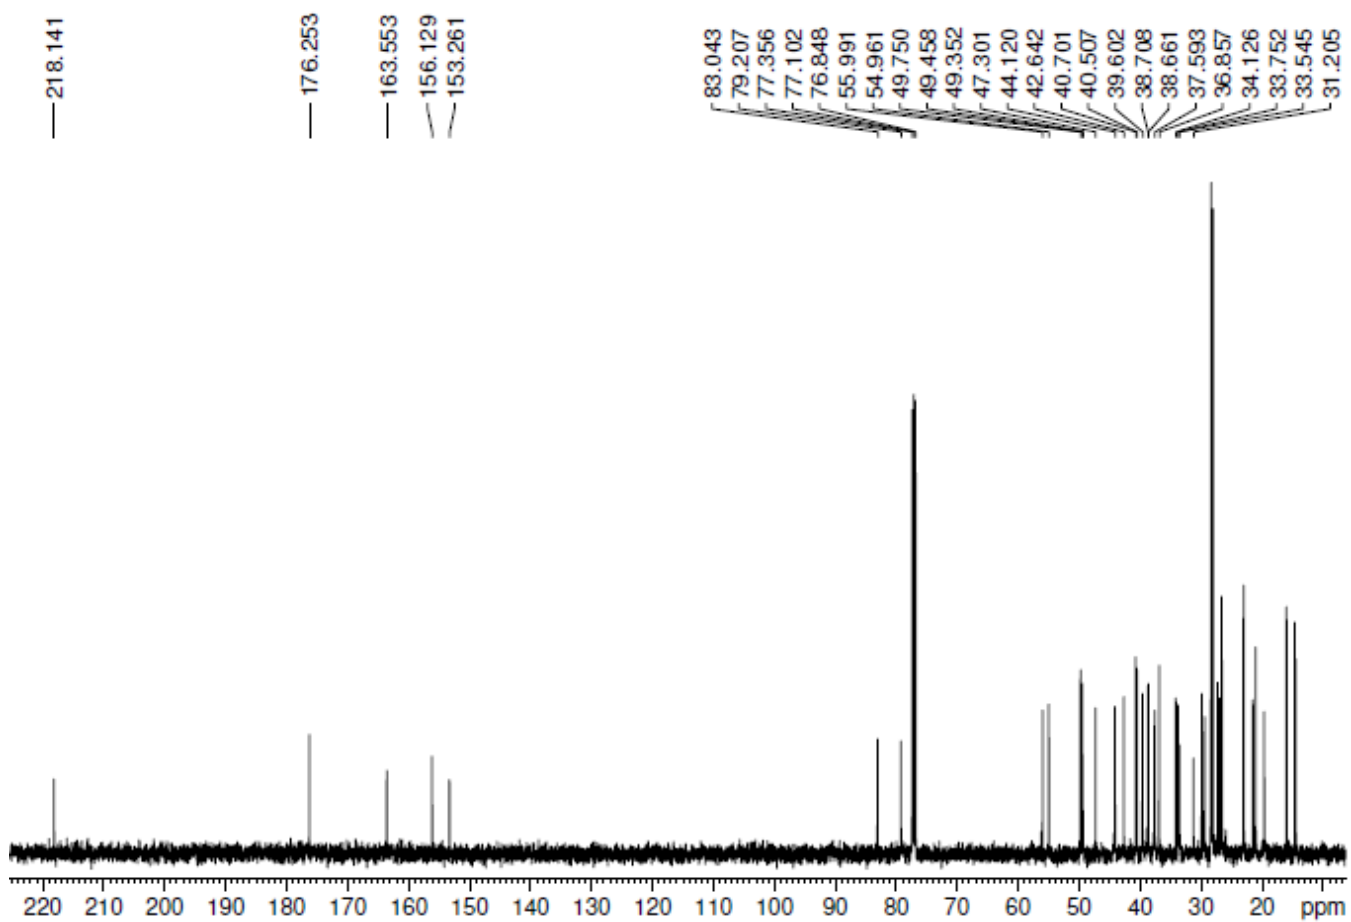



3 $\beta$ -N-(2-tert-butyloxycarbonyl ethylguanidine)-3-O-acetyl-lupane-28-amide (10).

$^1\text{H}$  NMR spectra ( $\text{CDCl}_3$ )

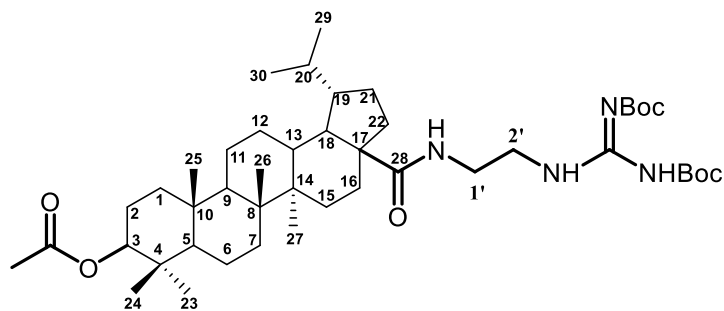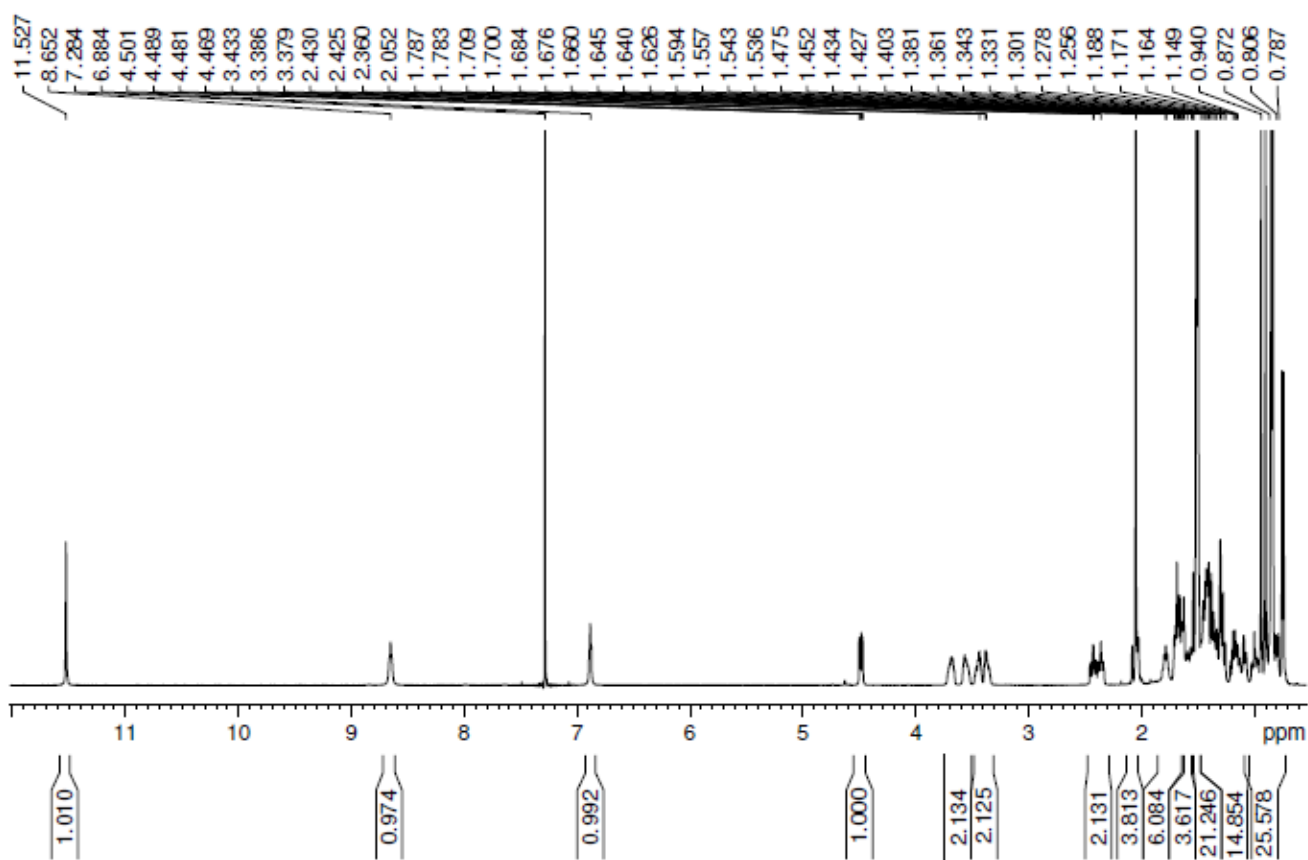

**3 $\beta$ -N-(2-tert-butyloxycarbonyl ethylguanidine)-3-O-acetyl-lupane-28-amide (10).**

$^{13}\text{C}$  NMR spectra ( $\text{CDCl}_3$ )

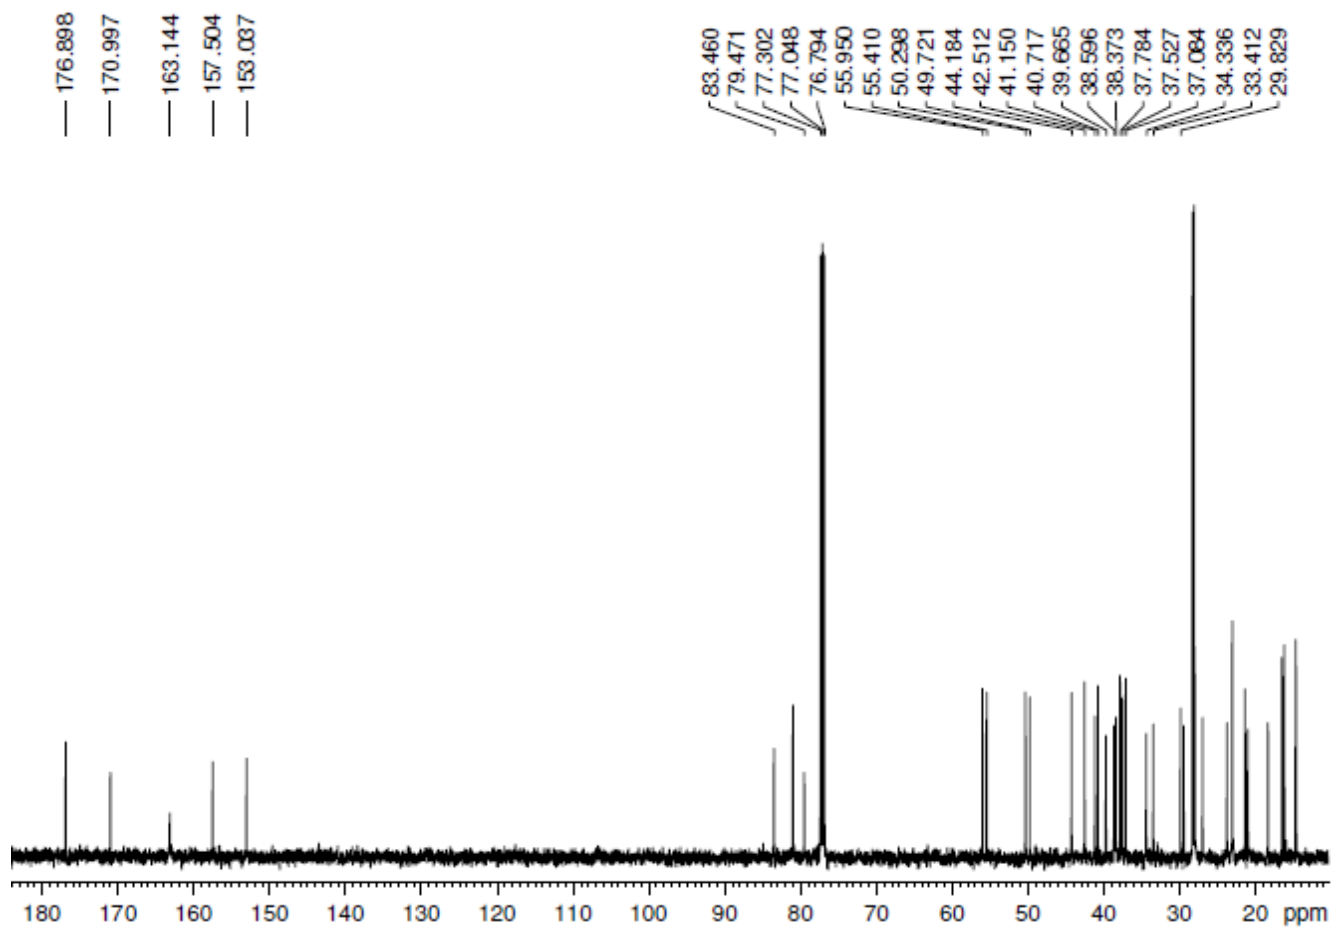

**3 $\beta$ -N-[4-tert-butyloxycarbonyl buthylguanidine]-3-O-acetyl -lupane-28-amide (11).**

$^1\text{H}$  NMR spectra ( $\text{CDCl}_3$ )

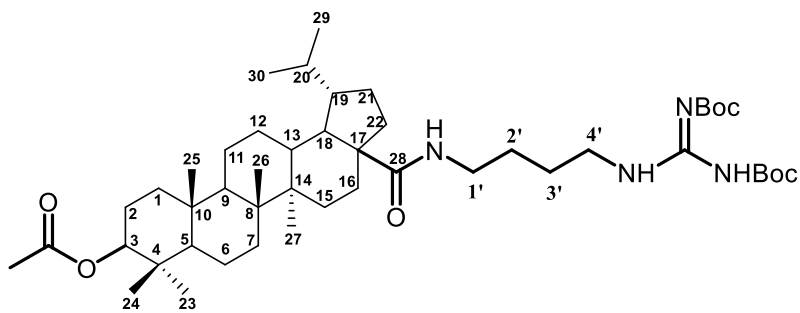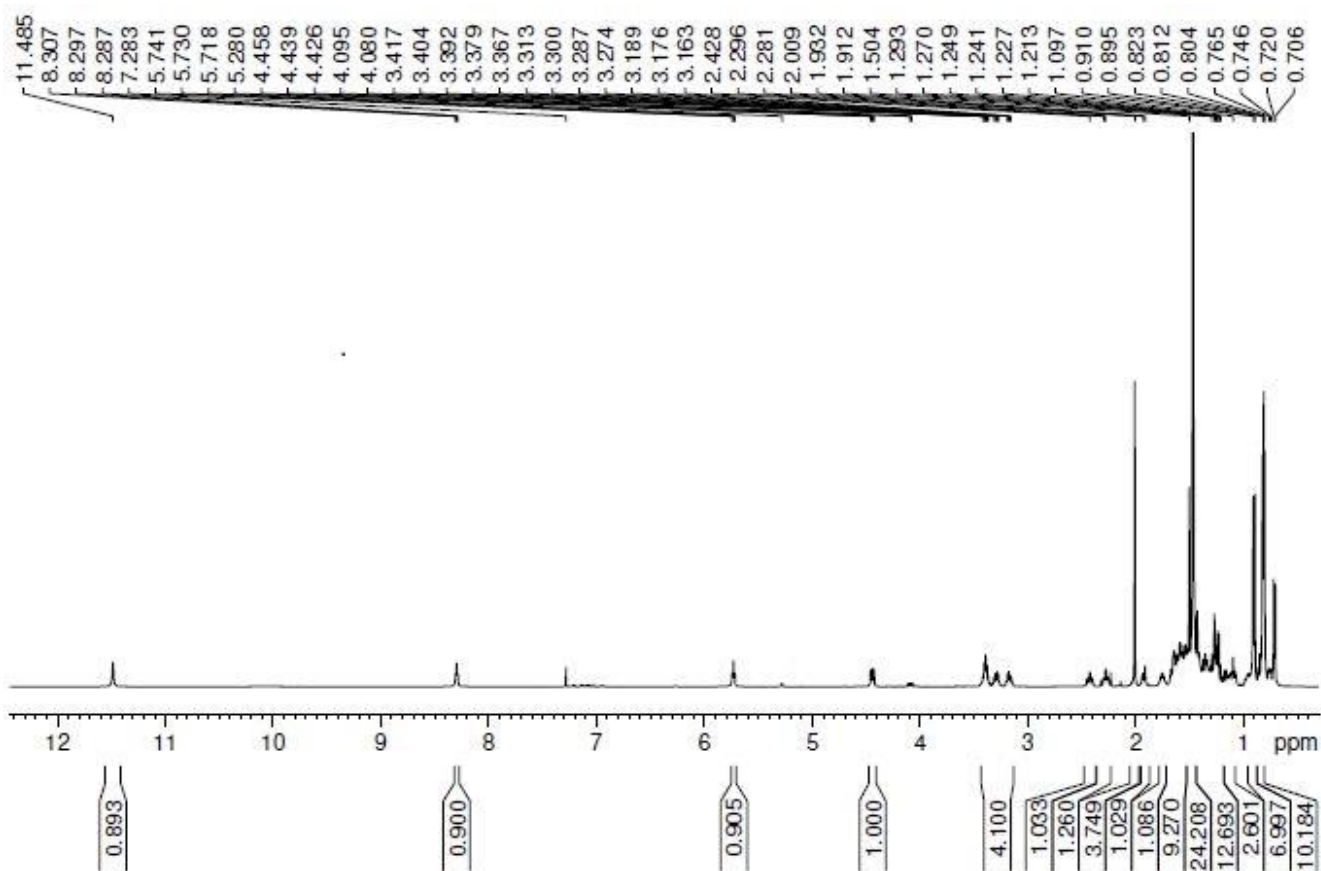

**3 $\beta$ -N-[4-tert-butyloxycarbonyl buthylguanidine]-3-O-acetyl -lupane-28-amide (11).**

<sup>13</sup>C NMR spectra (CDCl<sub>3</sub>)

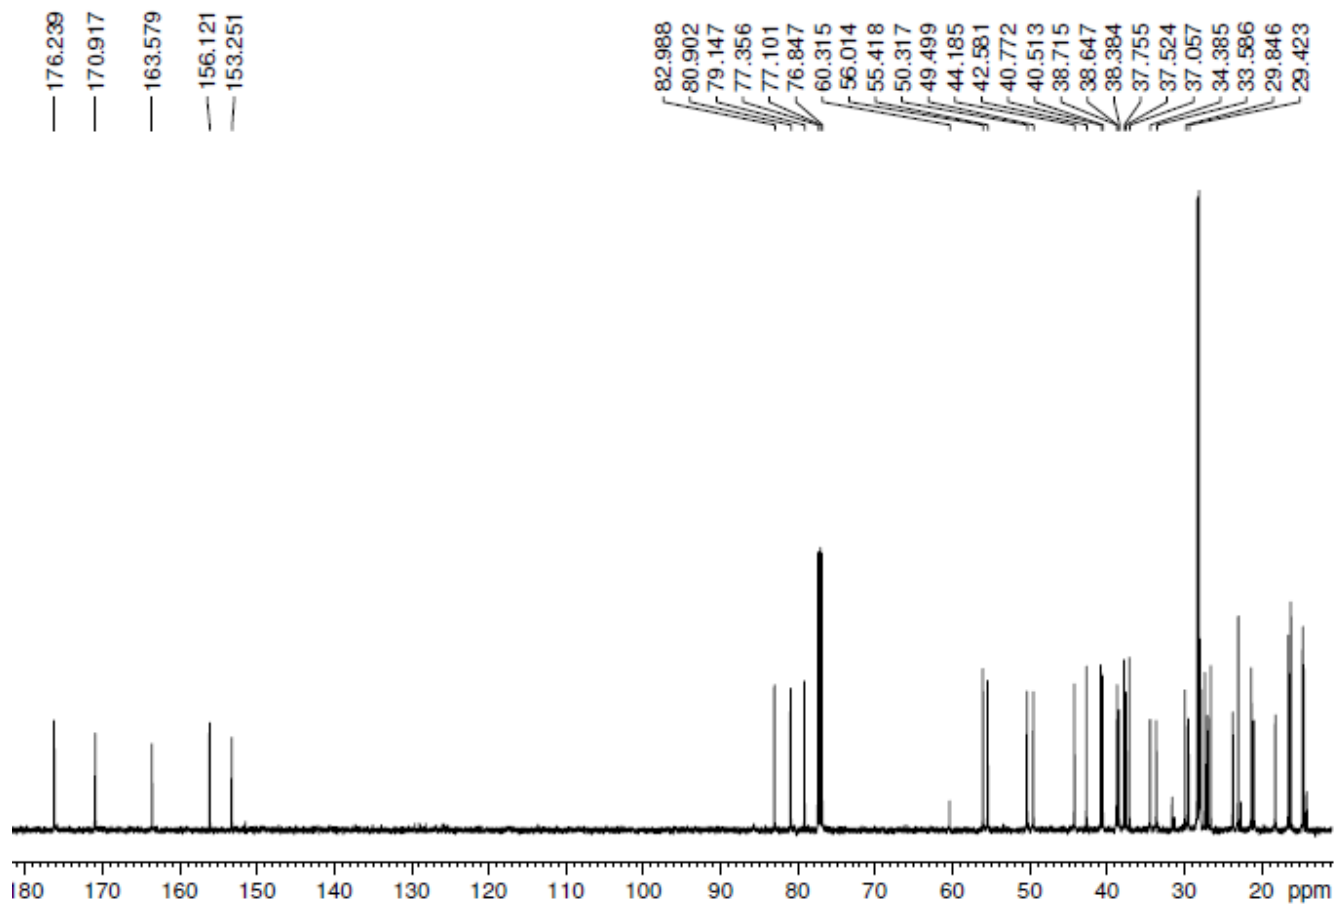

**3 $\beta$ -N-[2-(N,N'-bis-tert-butyloxycarbonyl ethylglyanidine)-aminoethyl]-3-O-acetyl-lupane-28-amide (12). <sup>1</sup>H NMR spectra (CDCl<sub>3</sub>)**

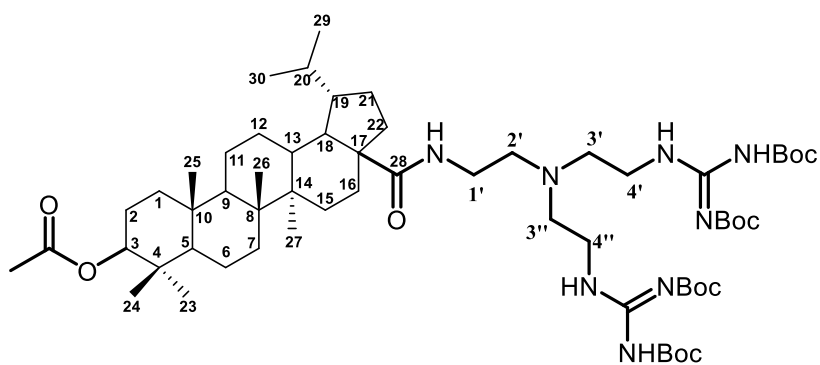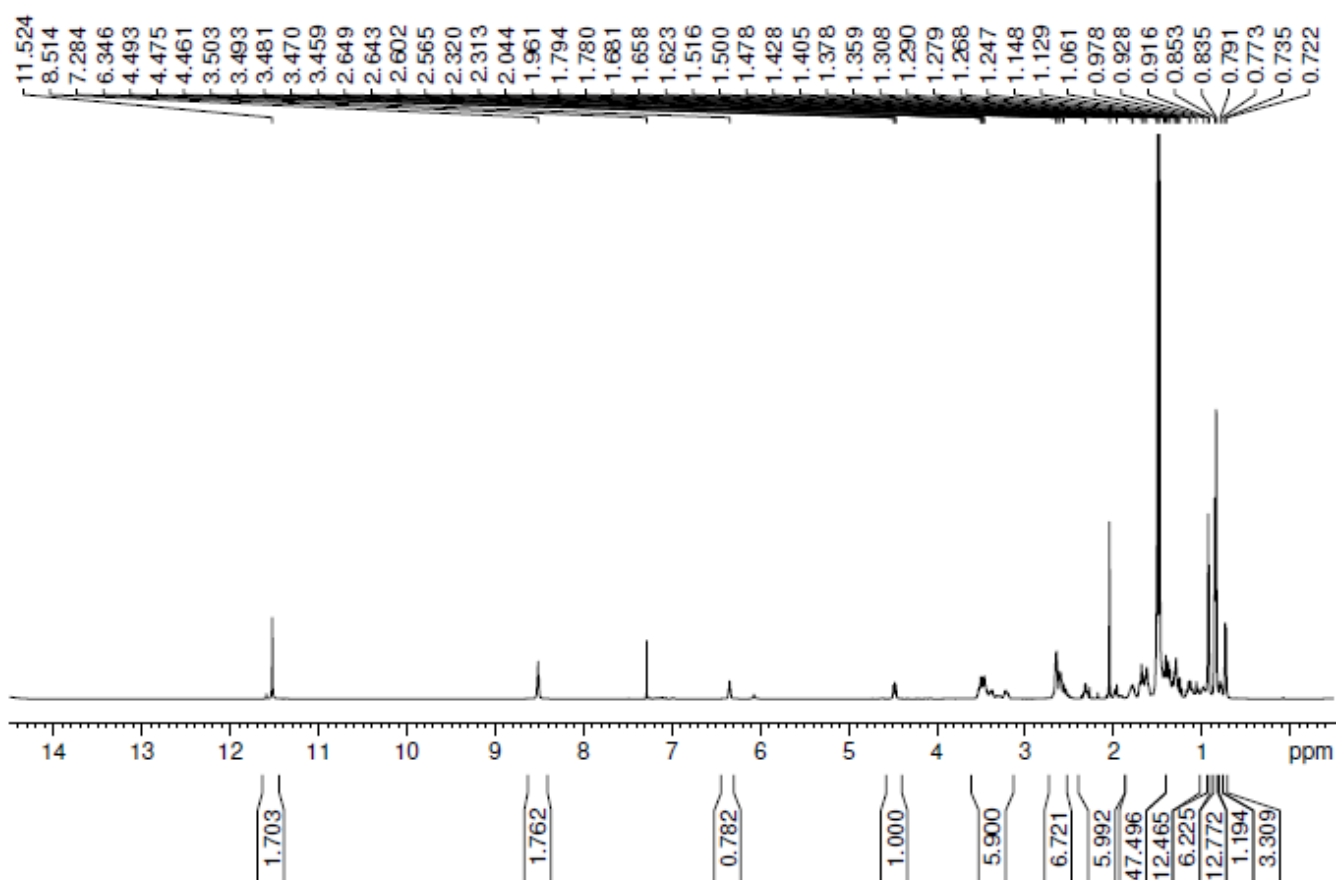

**3 $\beta$ -N-[2-(N,N'-bis-tert-butyloxycarbonyl ethyl)guanidine]-3-O-acetyl-lupane-28-amide (12).**  $^{13}\text{C}$  NMR spectra ( $\text{CDCl}_3$ )

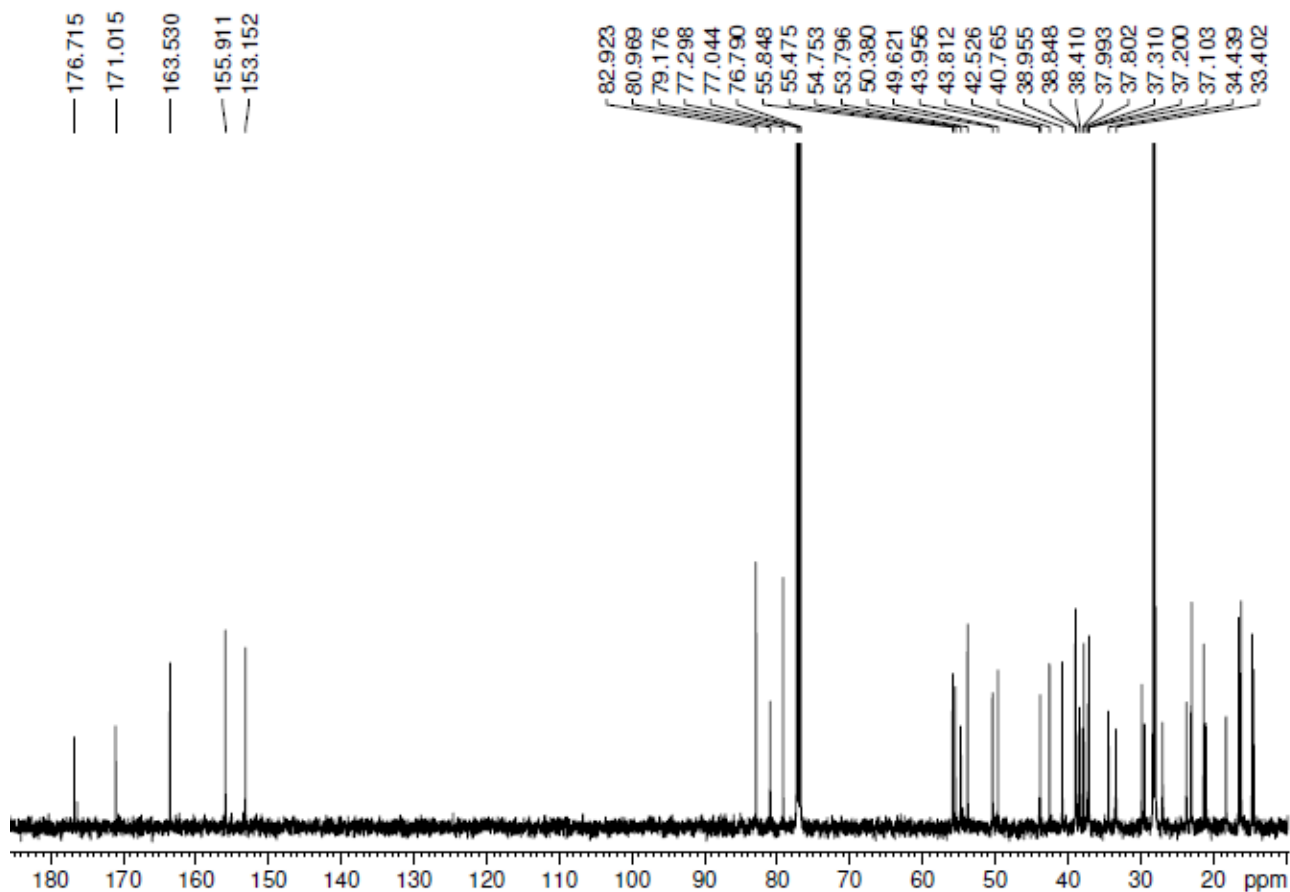

**3 $\beta$ -N-[[3-(3-tert-butyloxycarbonyl propyl)guanidine]piperazinyl]propyl]-3-O-acetyl-lupane-28-  
amide (13). <sup>1</sup>H NMR spectra (CDCl<sub>3</sub>)**

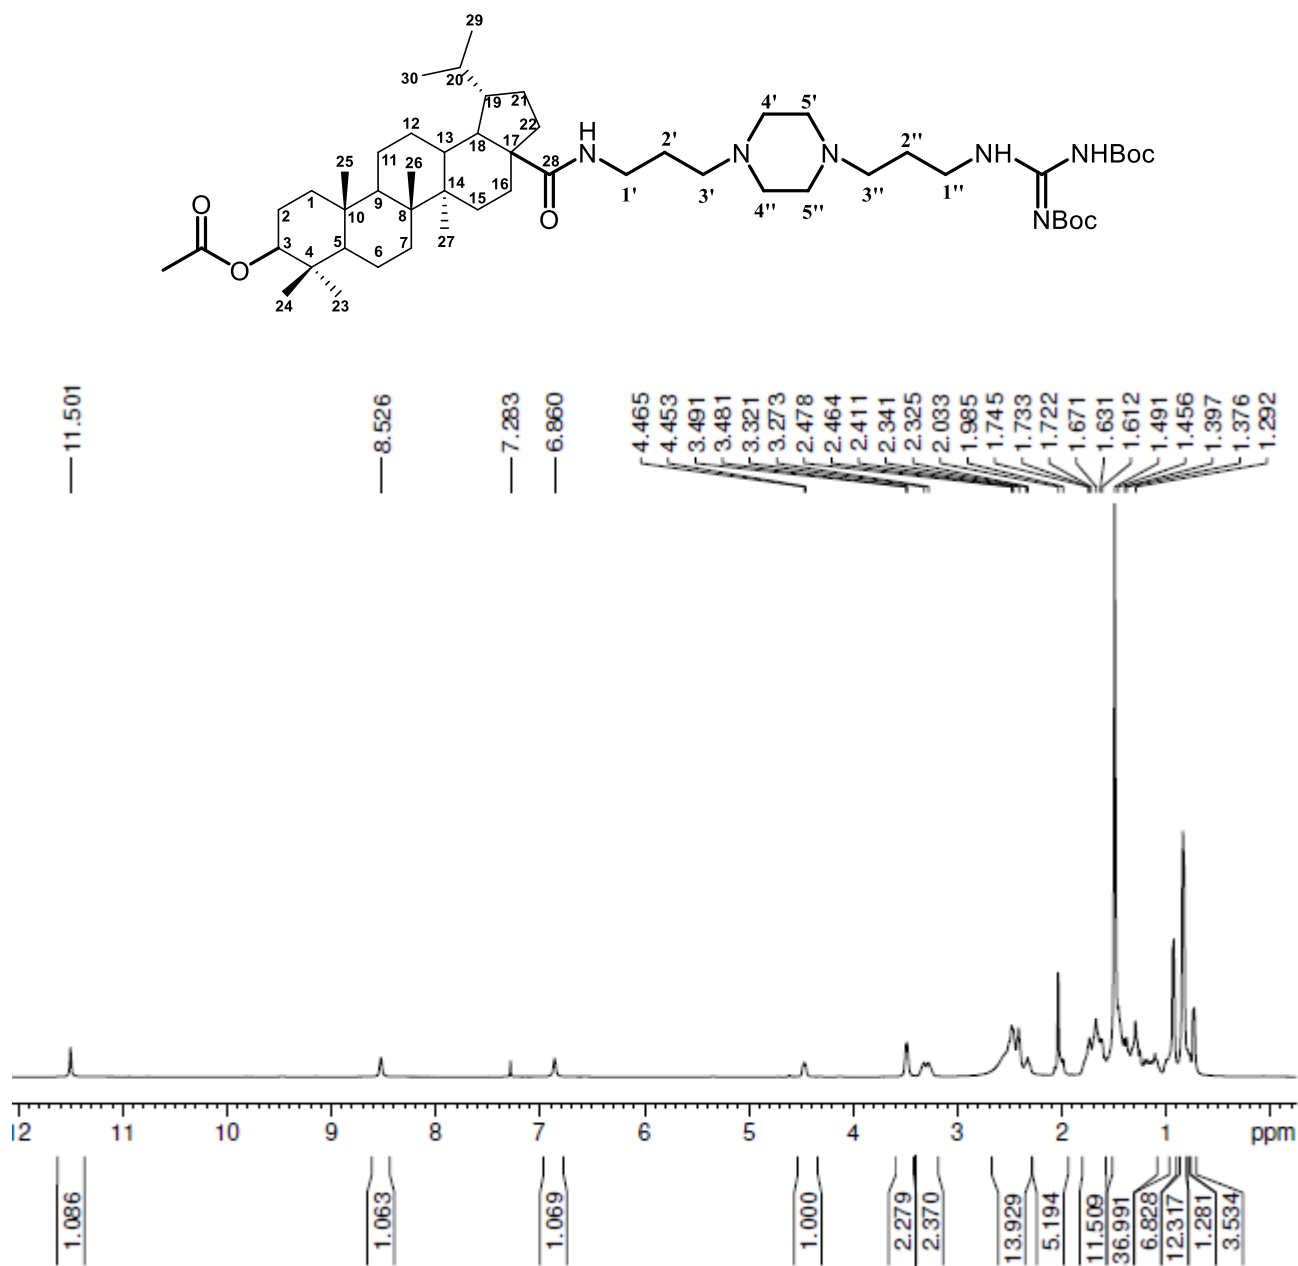

**3 $\beta$ -N-[[3-(3- tert-butyloxycarbonyl propyl)guanidine]piperazinyl]propyl]-3-O-acetyl-lupane-28-amide (13). <sup>13</sup>C NMR spectra (CDCl<sub>3</sub>)**

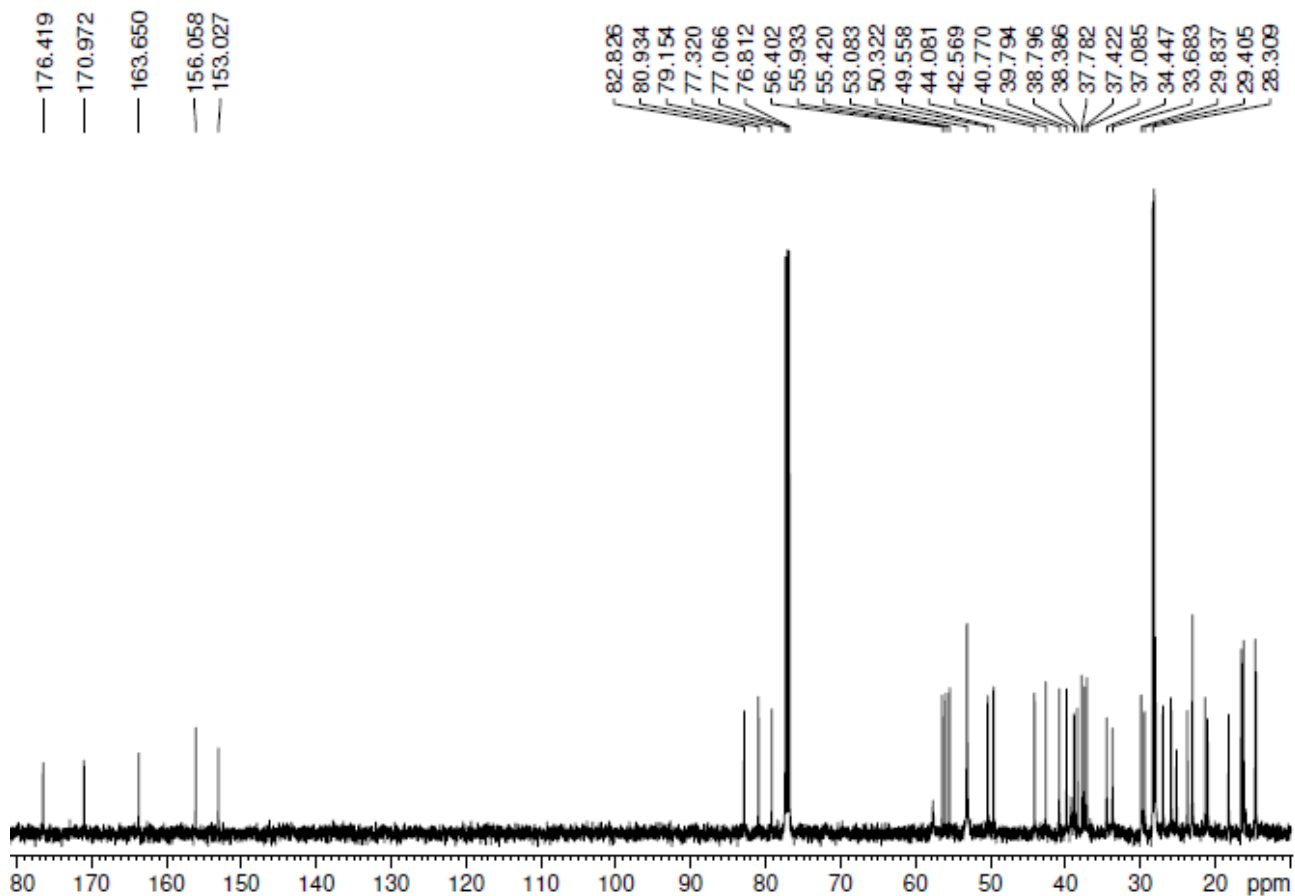



**3 $\beta$ -[2-tert-butyloxycarbonylguanidine-3-hydroxy-2-(hydroxymethyl)propyl]-3-O-acetyl-lupane-28-oate (15a). <sup>1</sup>H NMR spectra (CDCl<sub>3</sub>)**

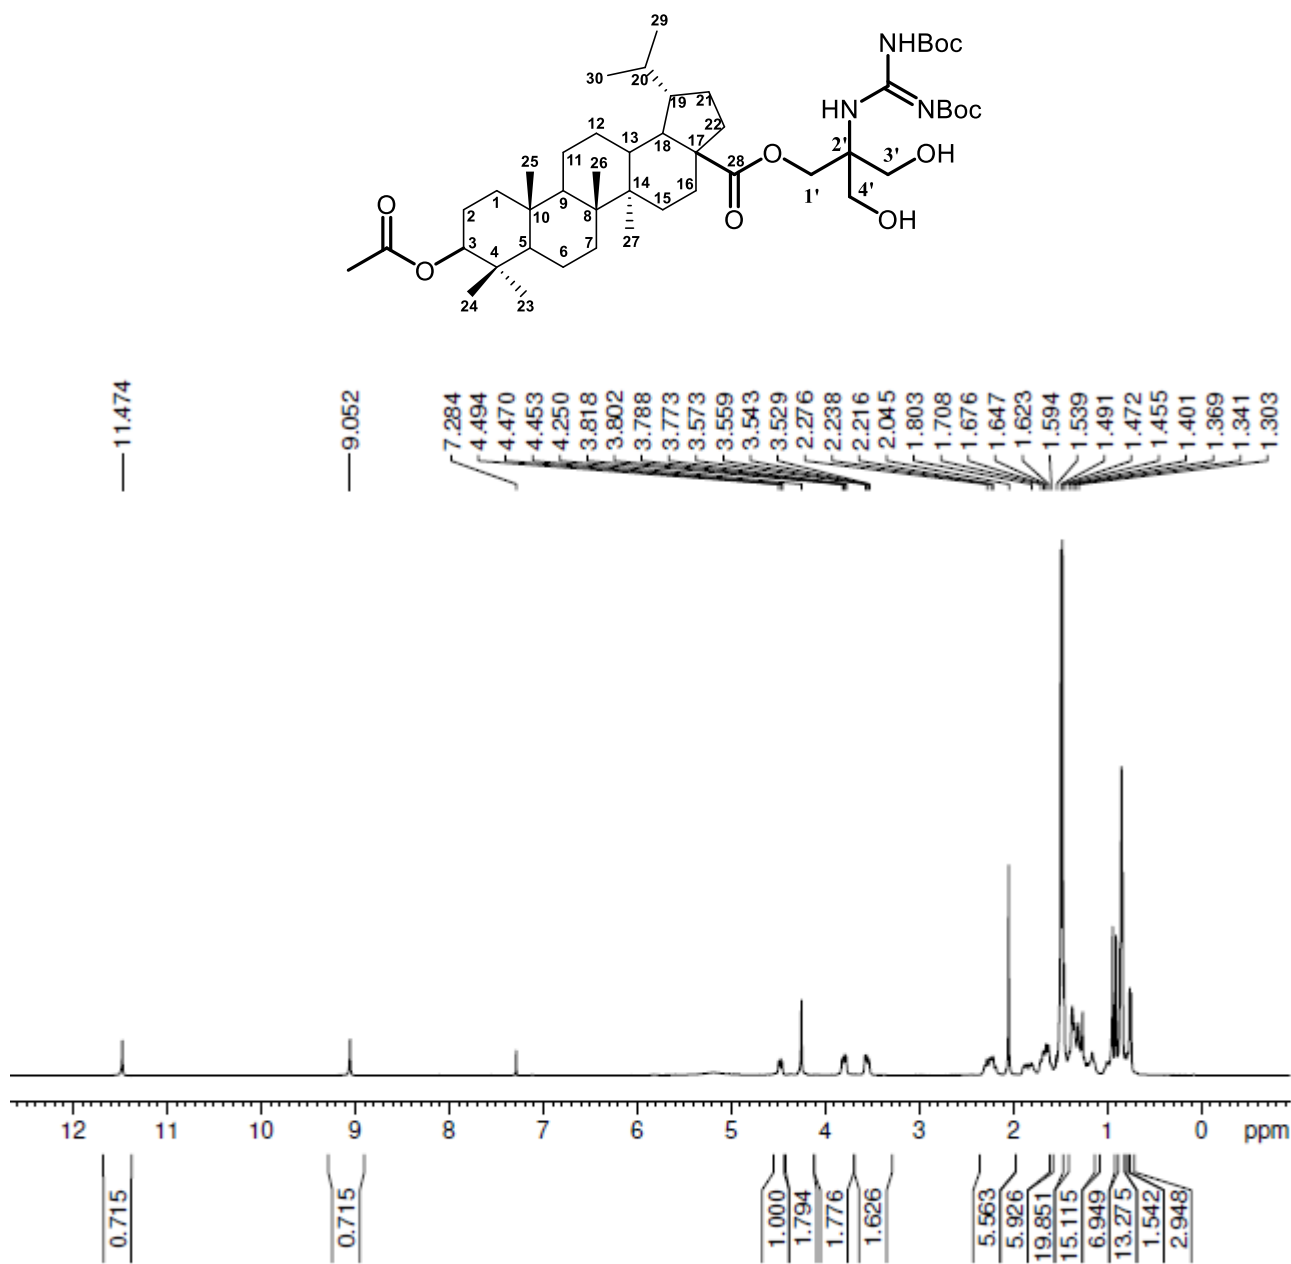

**3 $\beta$ -[2-tert-butyloxycarbonylguanidine-3-hydroxy-2-(hydroxymethyl)propyl]-3-O-acetyl -lupane-28-oate (15a).  $^{13}\text{C}$  NMR spectra ( $\text{CDCl}_3$ )**

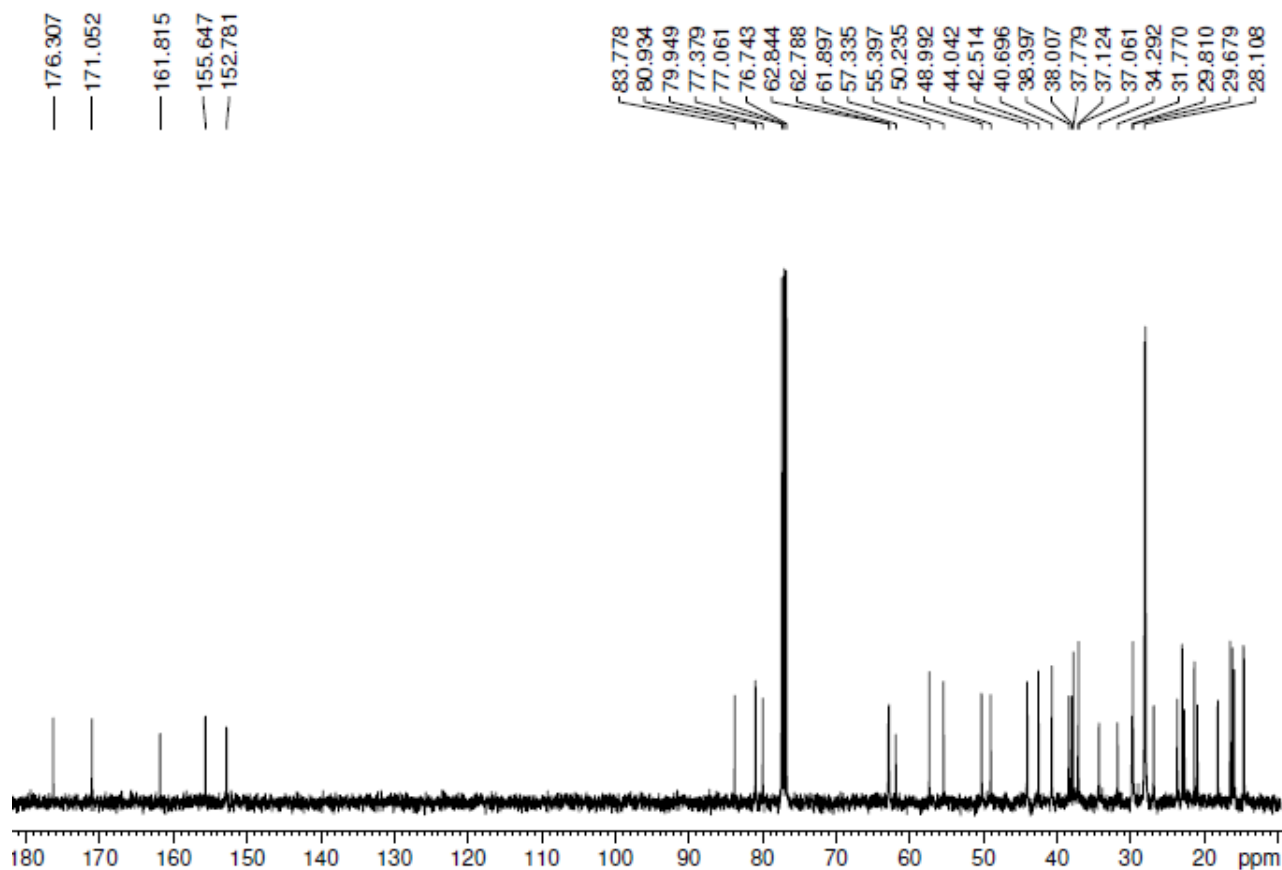

**3 $\beta$ -[2-tert-butyloxycarbonylguanidine-3-hydroxy-2-(hydroxymethyl)propyl]-3-O-acetyl-urs-12-en-28-oate (18a). <sup>1</sup>H NMR spectra (CDCl<sub>3</sub>)**

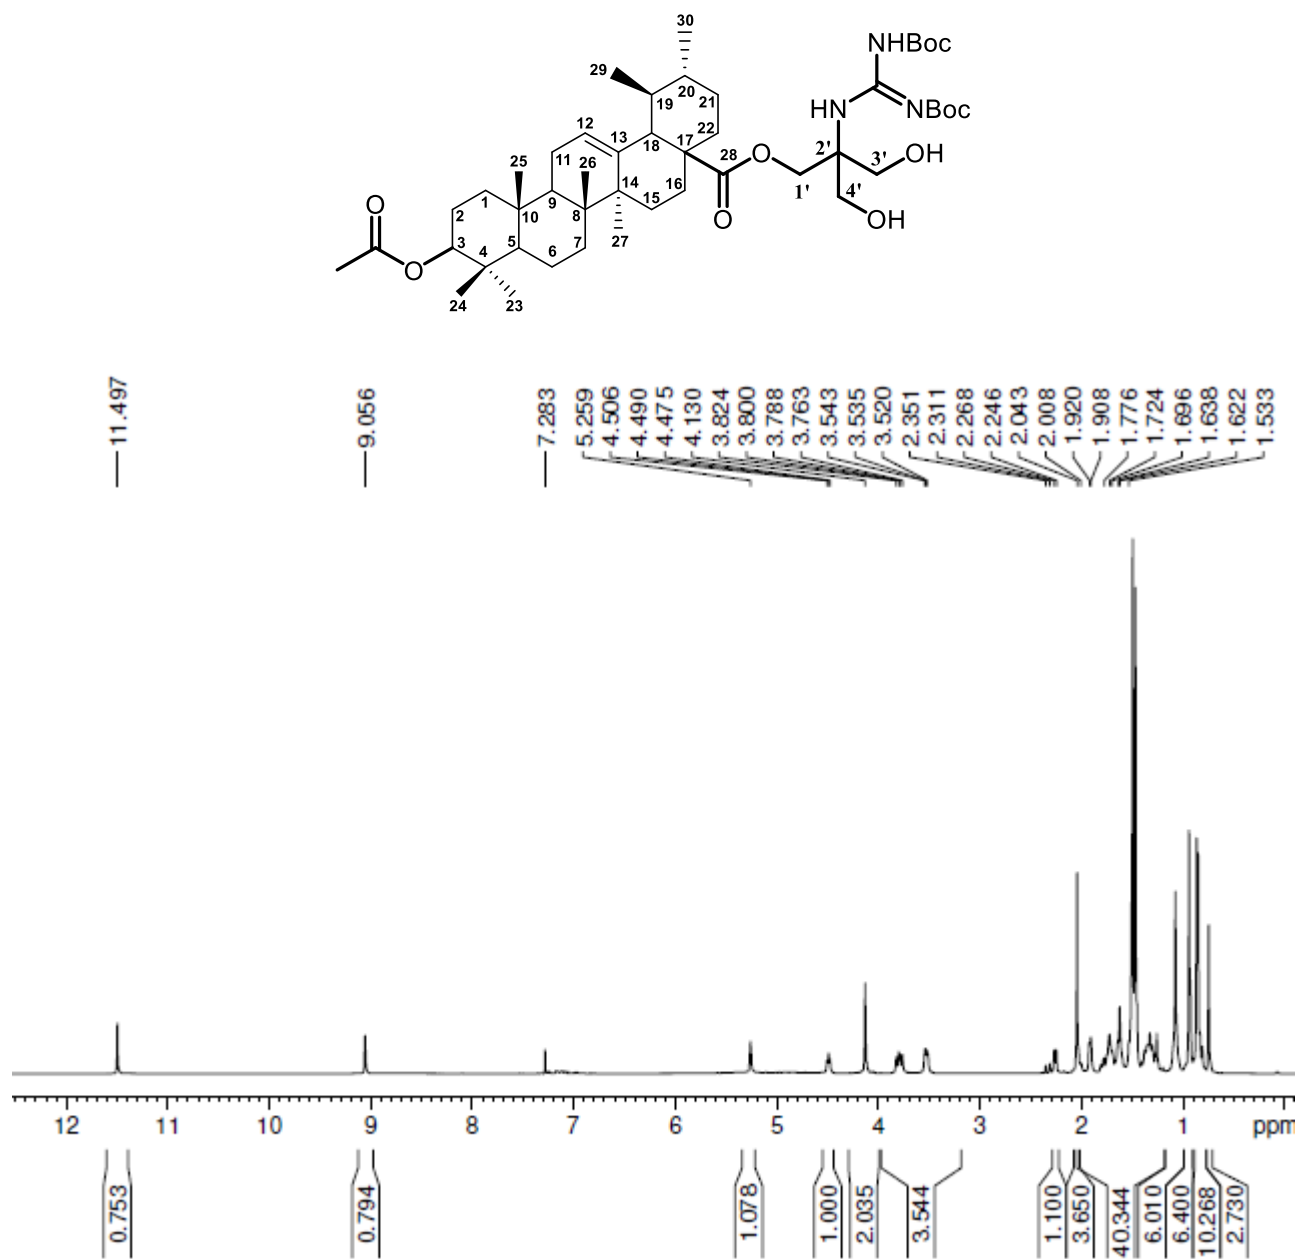

**3 $\beta$ -[2-tert-butyloxycarbonylguanidine-3-hydroxy-2-(hydroxymethyl)propyl]-3-O-acetyl-urs-12-en-28-oate (18a). <sup>13</sup>C NMR spectra (CDCl<sub>3</sub>)**

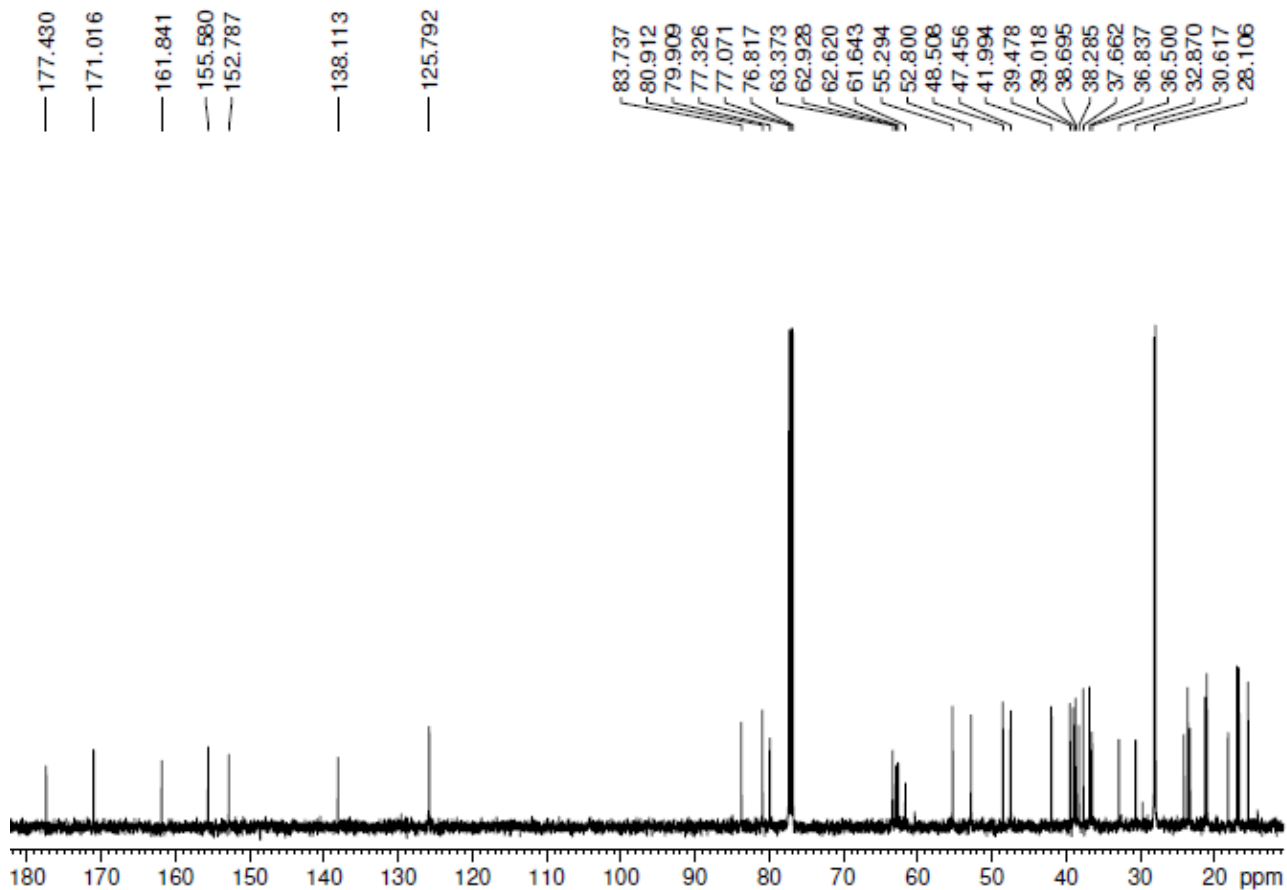

**3 $\beta$ -[2-tert-butyloxycarbonylguanidine-3-hydroxy-2-(hydroxymethyl)propyl]-3-O-acetyl-olean-12-en-28-oate (20a). <sup>1</sup>H NMR spectra (CDCl<sub>3</sub>)**

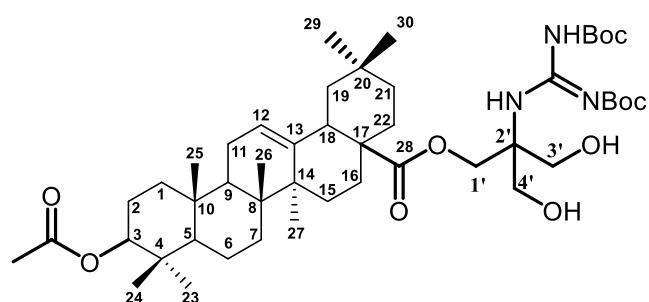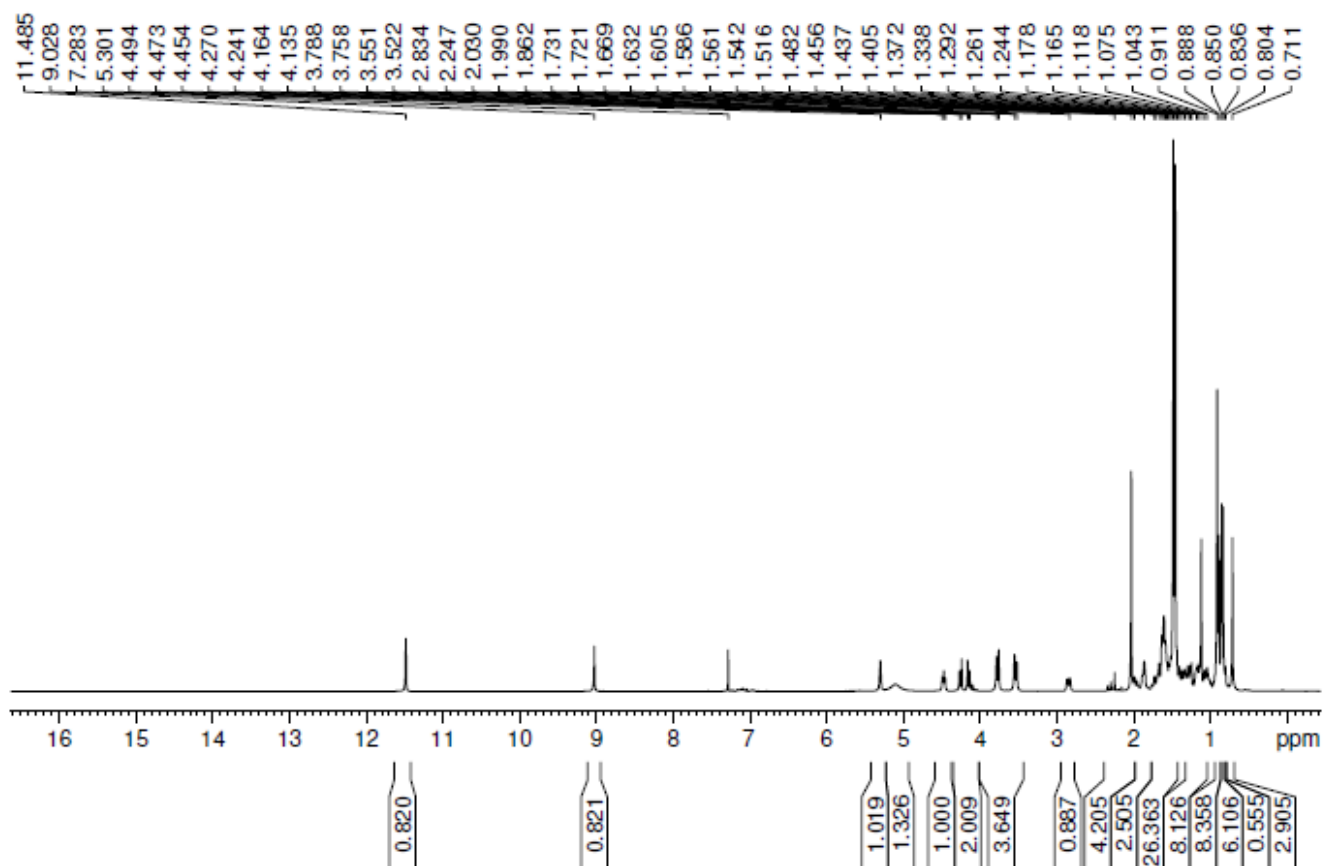

**3 $\beta$ -[2-tert-butyloxycarbonylguanidine-3-hydroxy-2-(hydroxymethyl)propyl]-3-O-acetyl - olean-12-en-28-oate (20a).**  $^{13}\text{C}$  NMR spectra ( $\text{CDCl}_3$ )

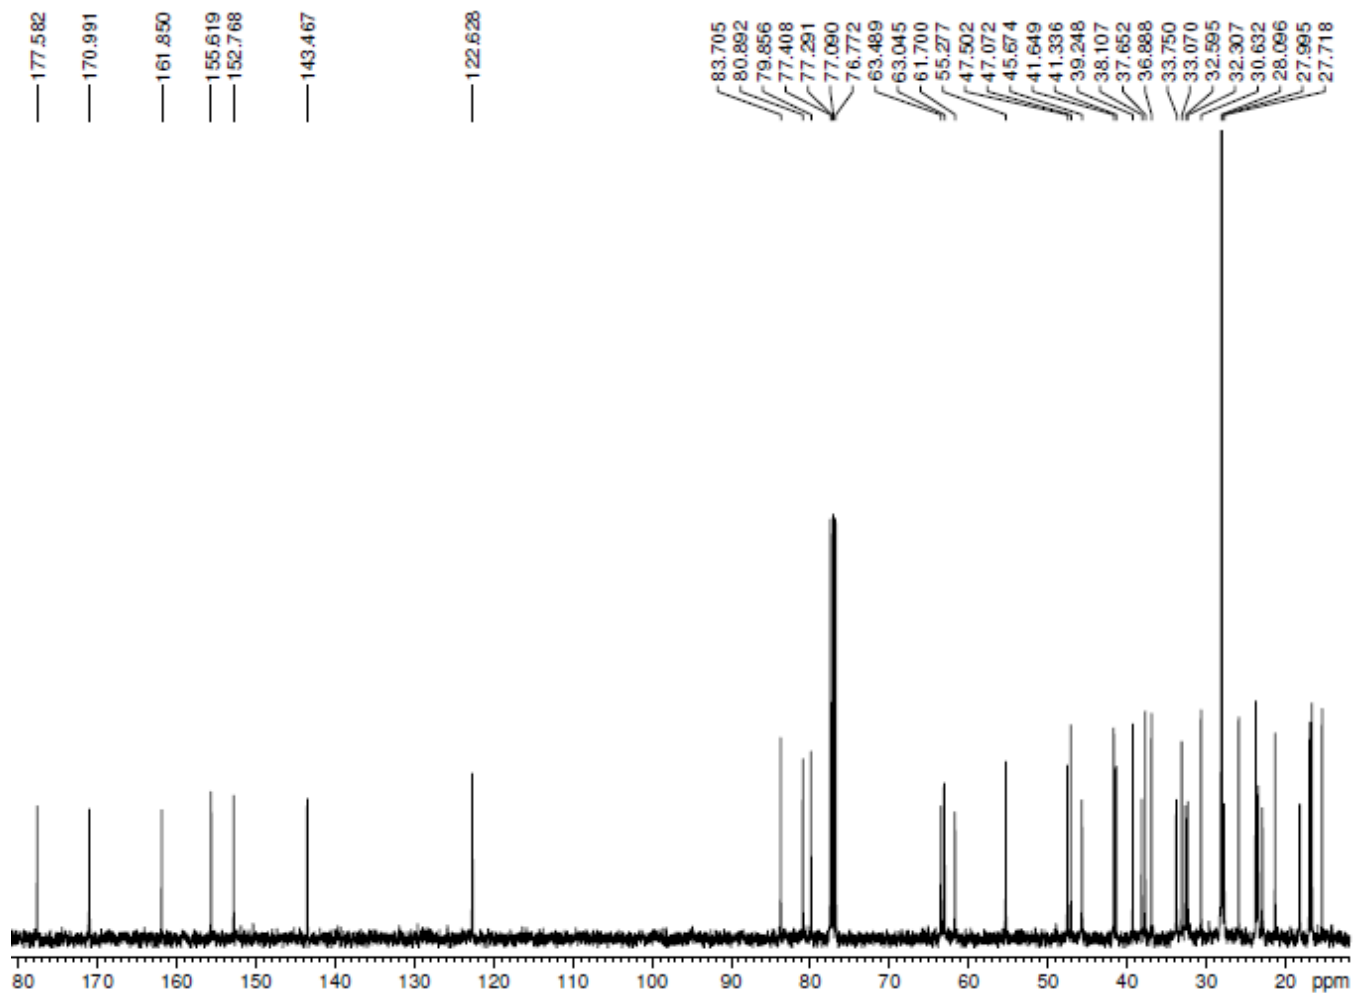

**N-(4-buthylguanidine)-3-oxolupane-28-amide trifluoroacetate (9a).**  $^1\text{H}$  NMR spectra ( $\text{CDCl}_3$ )

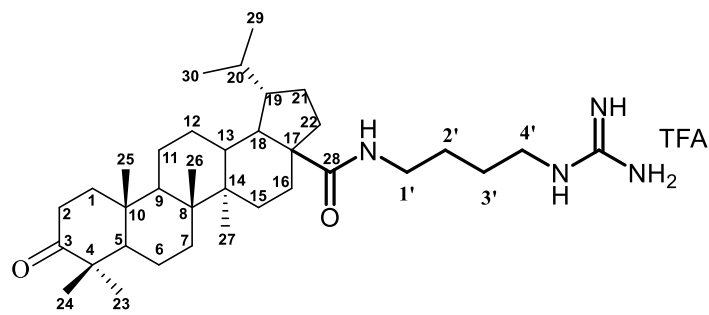

— 11.133

— 7.497  
— 7.284  
— 6.817  
— 6.385

3.260  
2.453  
2.311  
2.141  
2.043  
2.017  
1.911  
1.765  
1.582  
1.456  
1.418  
1.396  
1.260

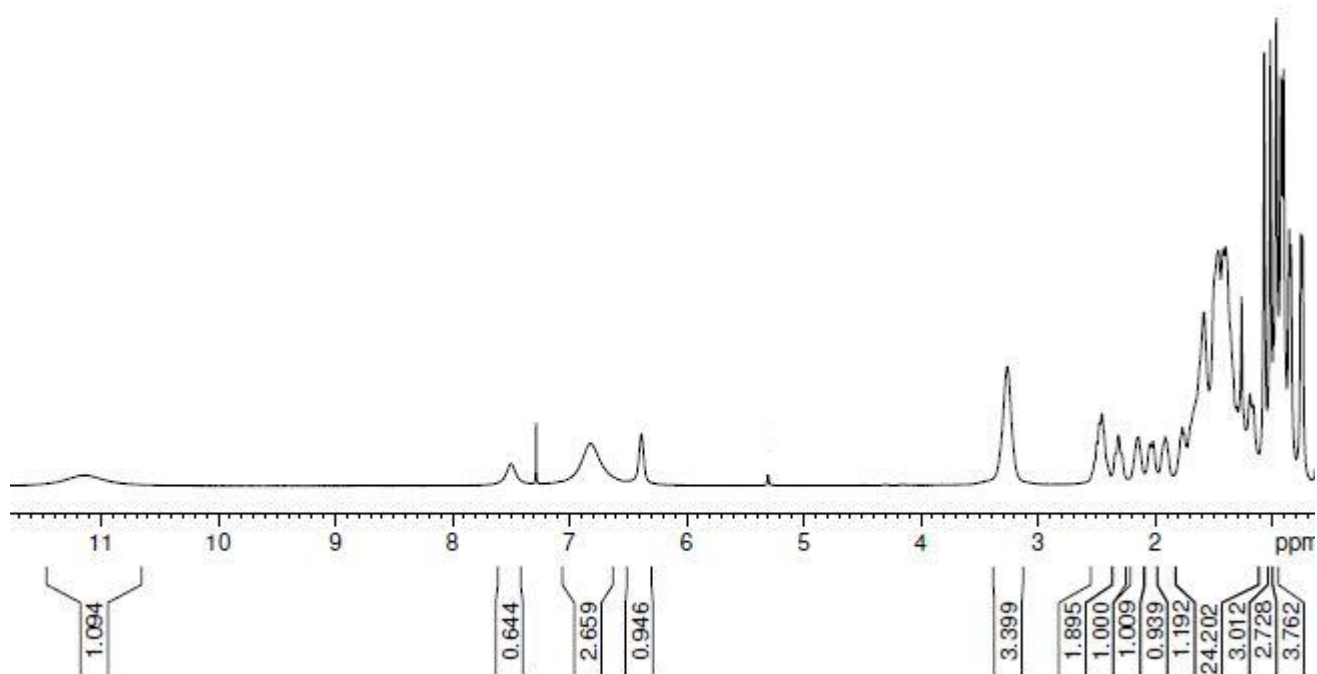

**N-(4-buthylguanidine)-3-oxolupane-28-amide trifluoroacetate (9a).**  $^{13}\text{C}$  NMR spectra ( $\text{CDCl}_3$ )

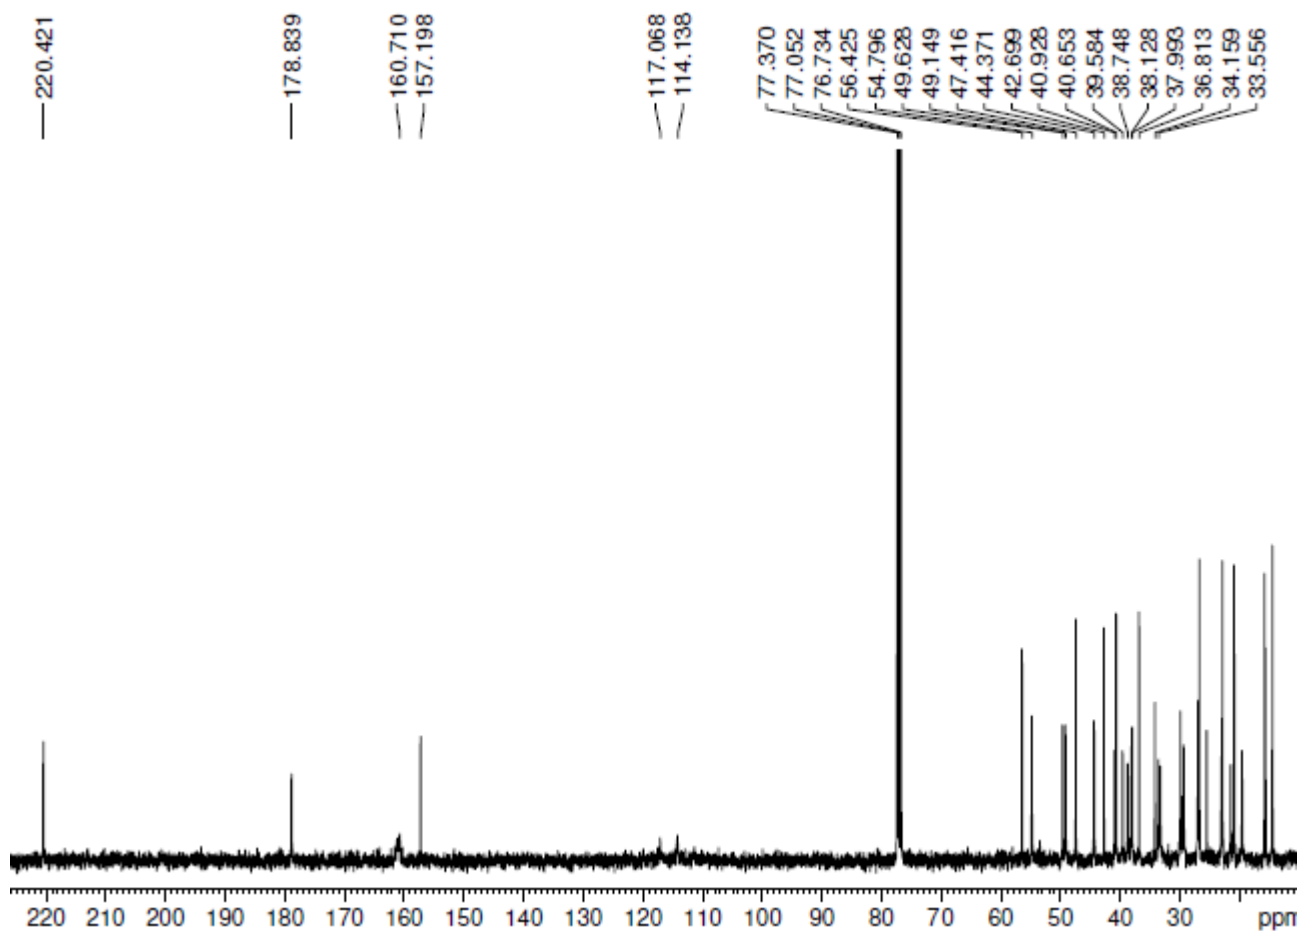



**N-(4-buthylguanidine)-3-oxolupane-28-amide trifluoroacetate (9a).**  $^{19}\text{F}$  NMR spectra ( $\text{CDCl}_3$ )

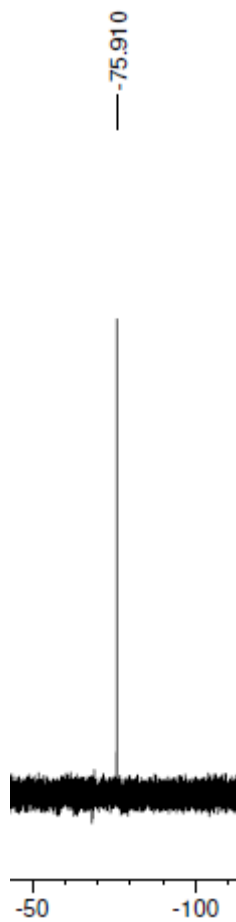

**3 $\beta$ -N-(2-ethylguanidine)-3-O-acetyl-lupane-28-amide trifluoroacetate (10a).**  $^1\text{H}$  NMR spectra  
( $\text{CDCl}_3$ )

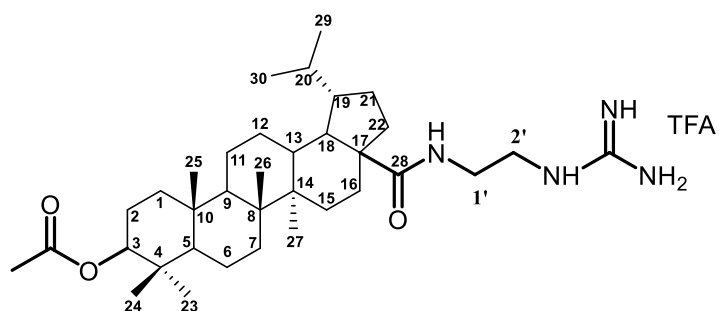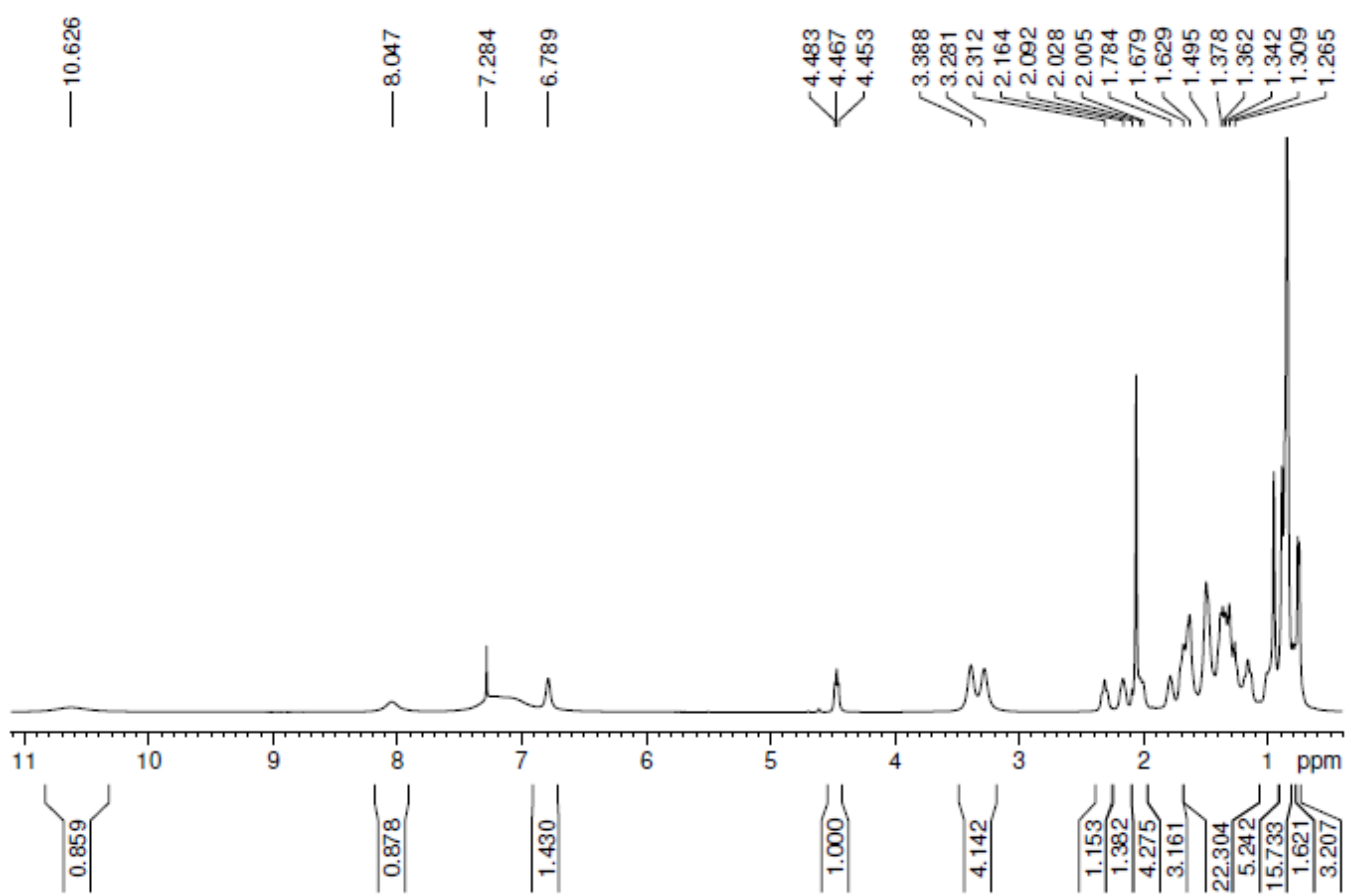

**3 $\beta$ -N-(2-ethylguanidine)-3- O-acetyl-lupane-28-amide trifluoroacetate (10a).**  $^{13}\text{C}$  NMR spectra  
( $\text{CDCl}_3$ )

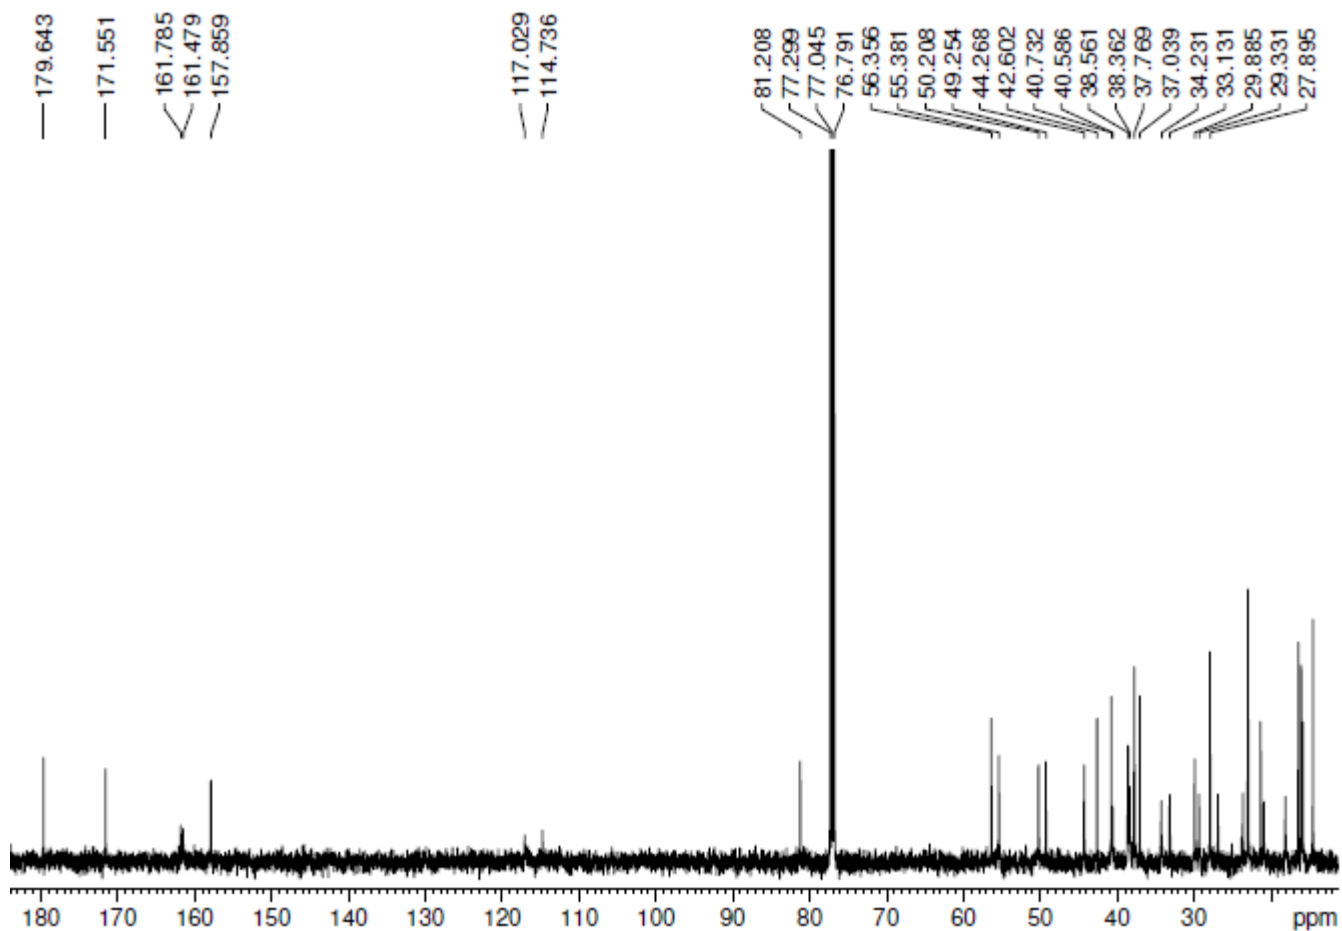

**3 $\beta$ -N-(2-ethylguanidine)-3- O-acetyl-lupane-28-amide trifluoroacetate (10a).**  $^{13}\text{F}$  NMR spectra  
( $\text{CDCl}_3$ )

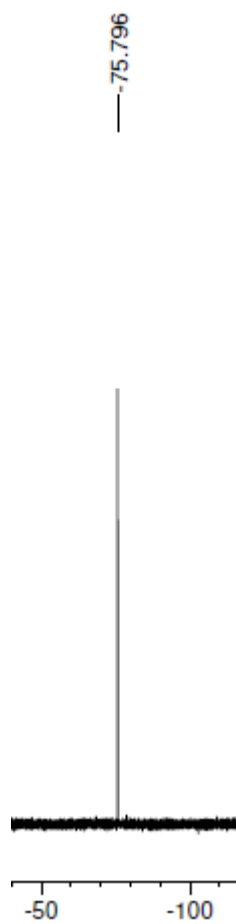

**3 $\beta$ -N-(4-buthylguanidine)-3-O-acetyl-lupane-28-amide trifluoroacetate (11a).** <sup>1</sup>H NMR spectra (MeOD)

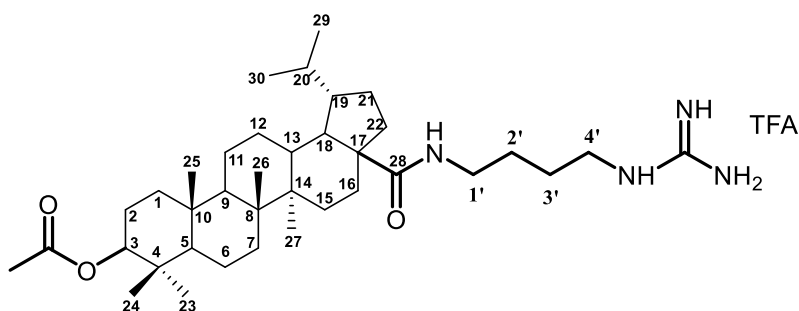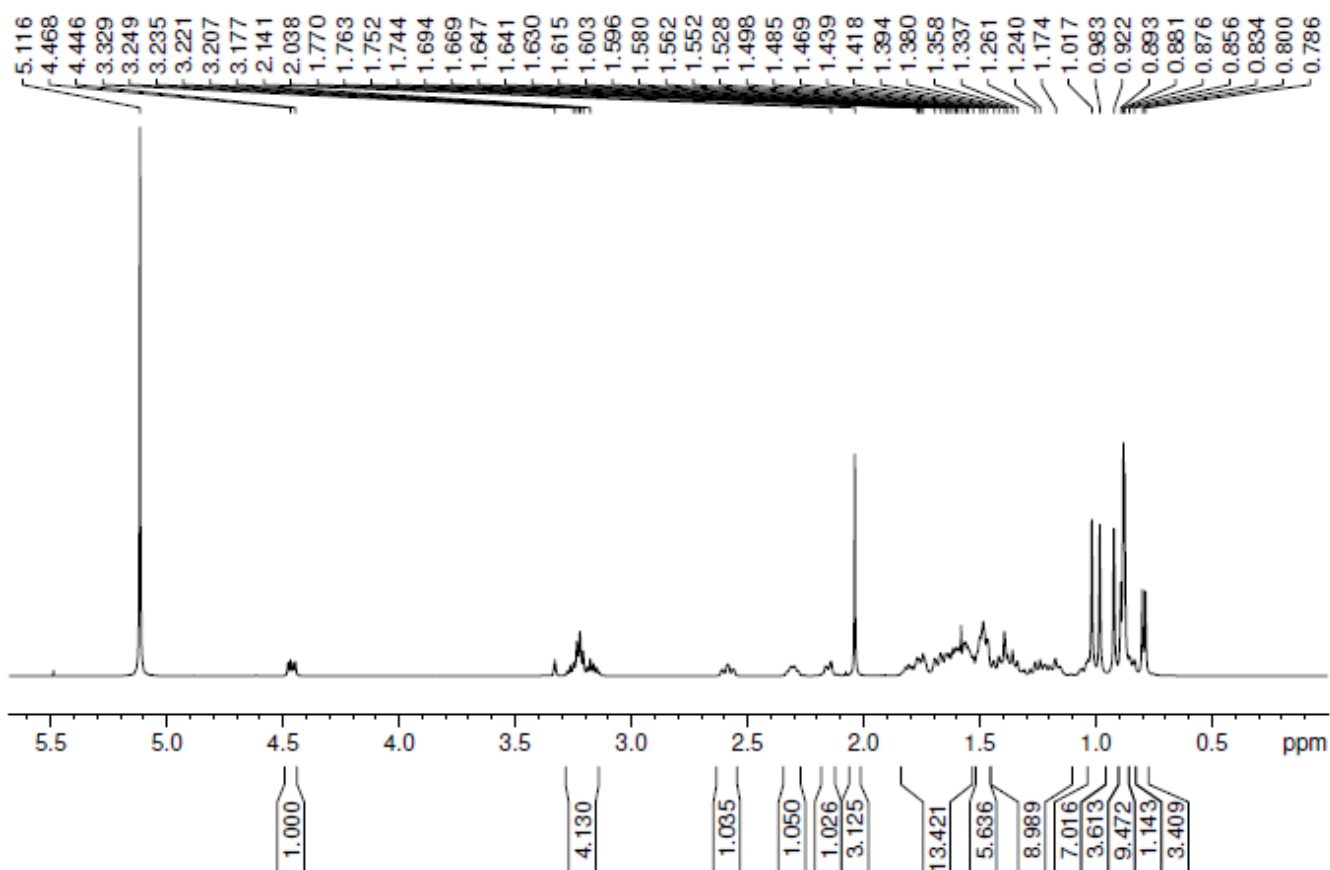

**3 $\beta$ -N-(4-buthylguanidine)-3- O-acetyl-lupane-28-amide trifluoroacetate (11a).** <sup>13</sup>C NMR spectra  
(MeOD)

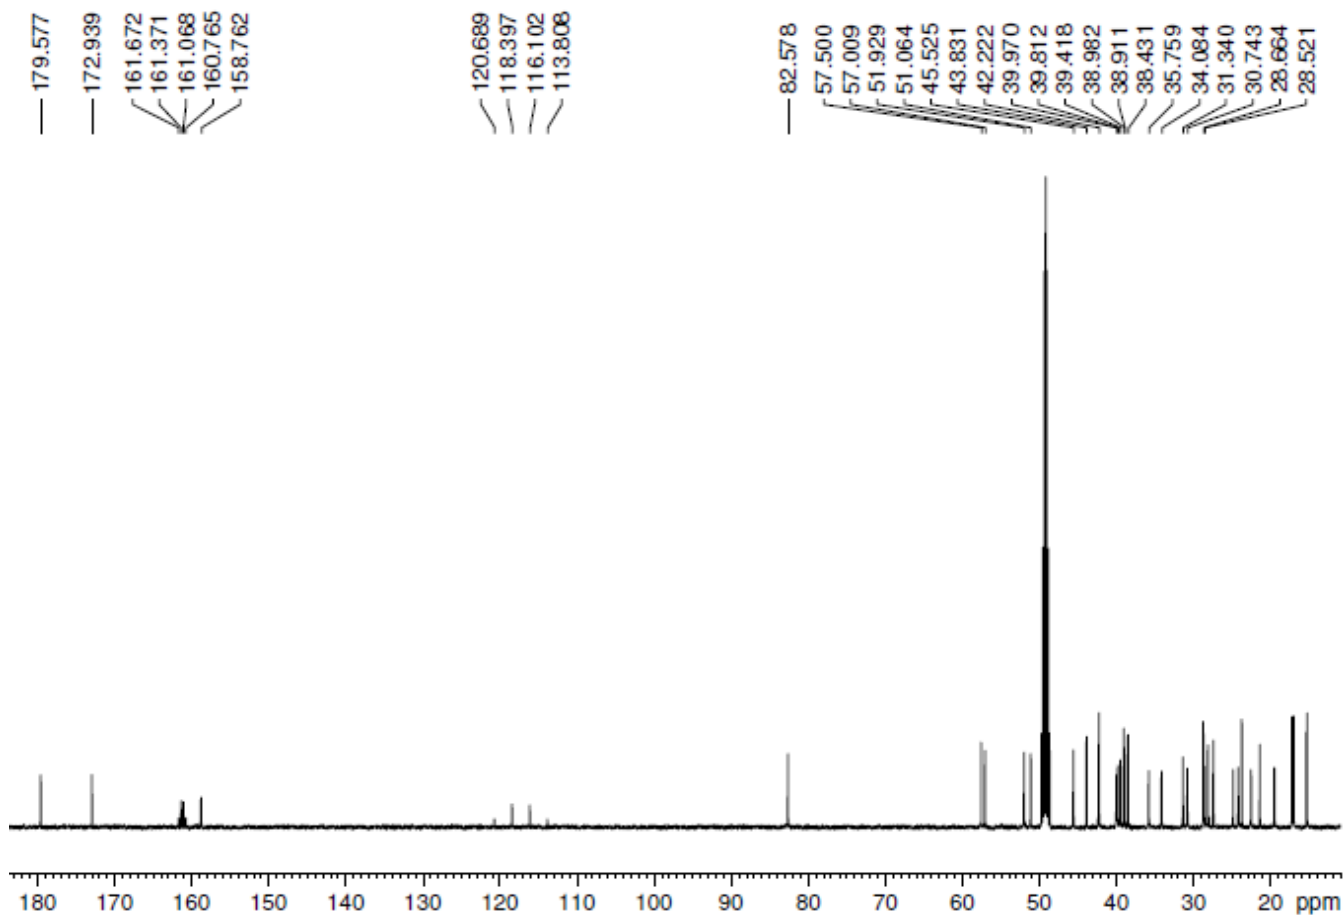

**3 $\beta$ -N-(4-buthylgyanidine)-3- O-acetyl-lupane-28-amide trifluoroacetate (11a). <sup>19</sup>F NMR spectra (MeOD)**

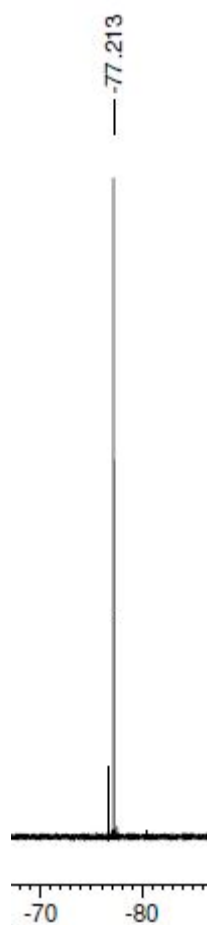

**3β-N-[2-(N,N'-bis-ethylguanidine)-ethyl]-3-O-acetyl-lupane-28-amide trifluoroacetate (12a)**

<sup>1</sup>H NMR spectra (MeOD)

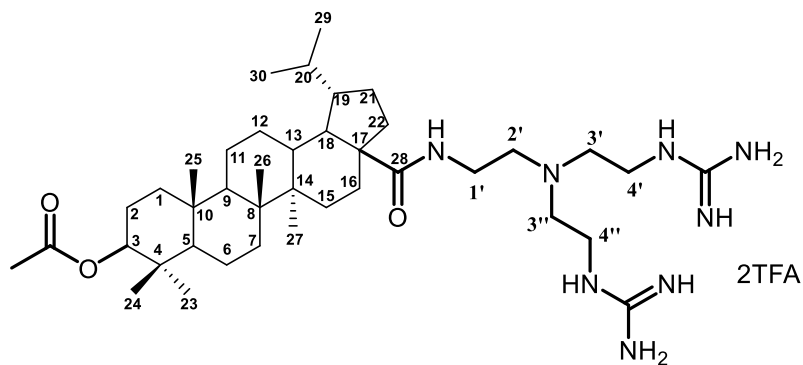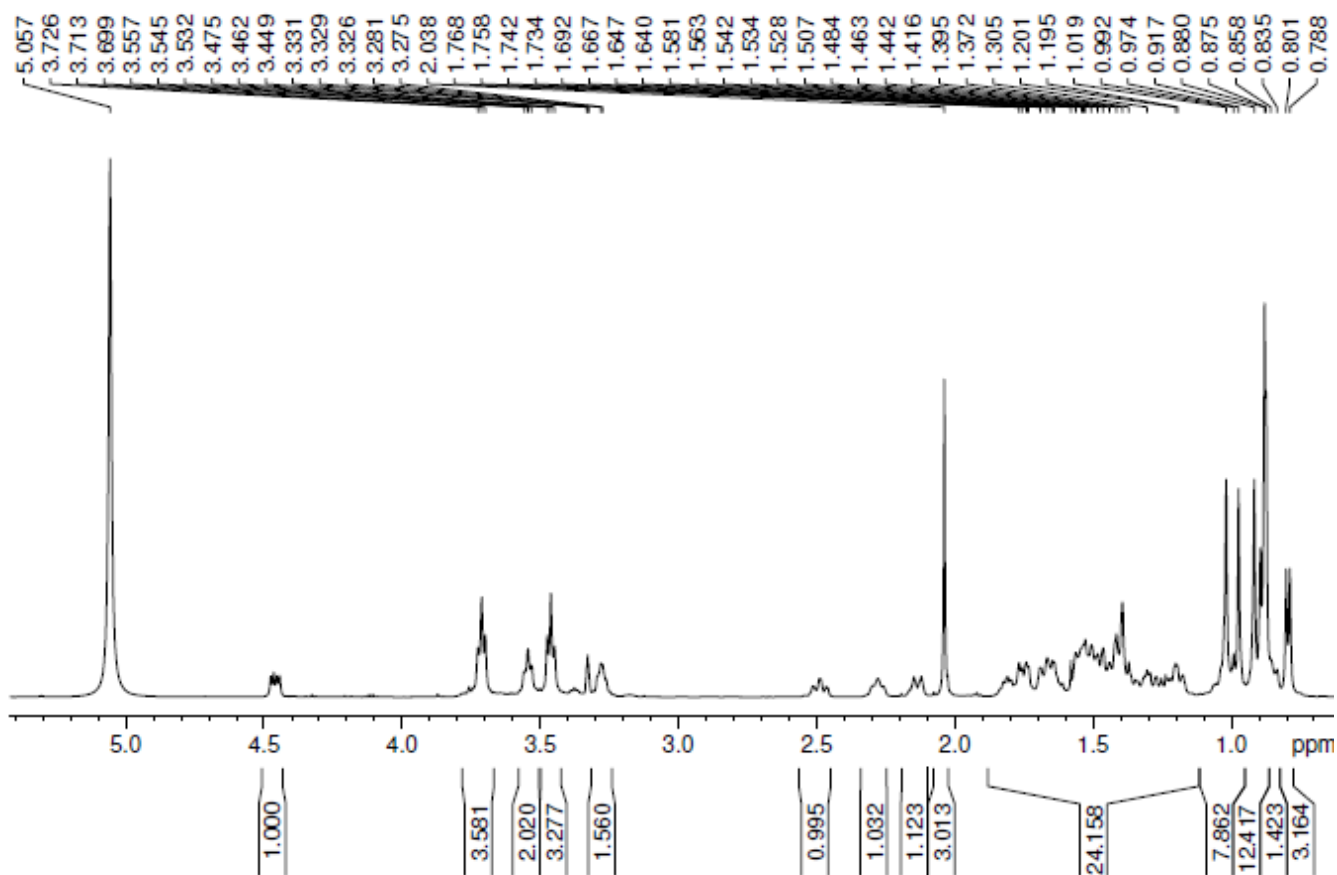



**3 $\beta$ -N-[2-(N,N'-bis-ethylguanidine)-ethyl]-3- O-acetyl -lupane-28-amide trifluoroacetate (12a).**

<sup>13</sup>C NMR spectra (MeOD)

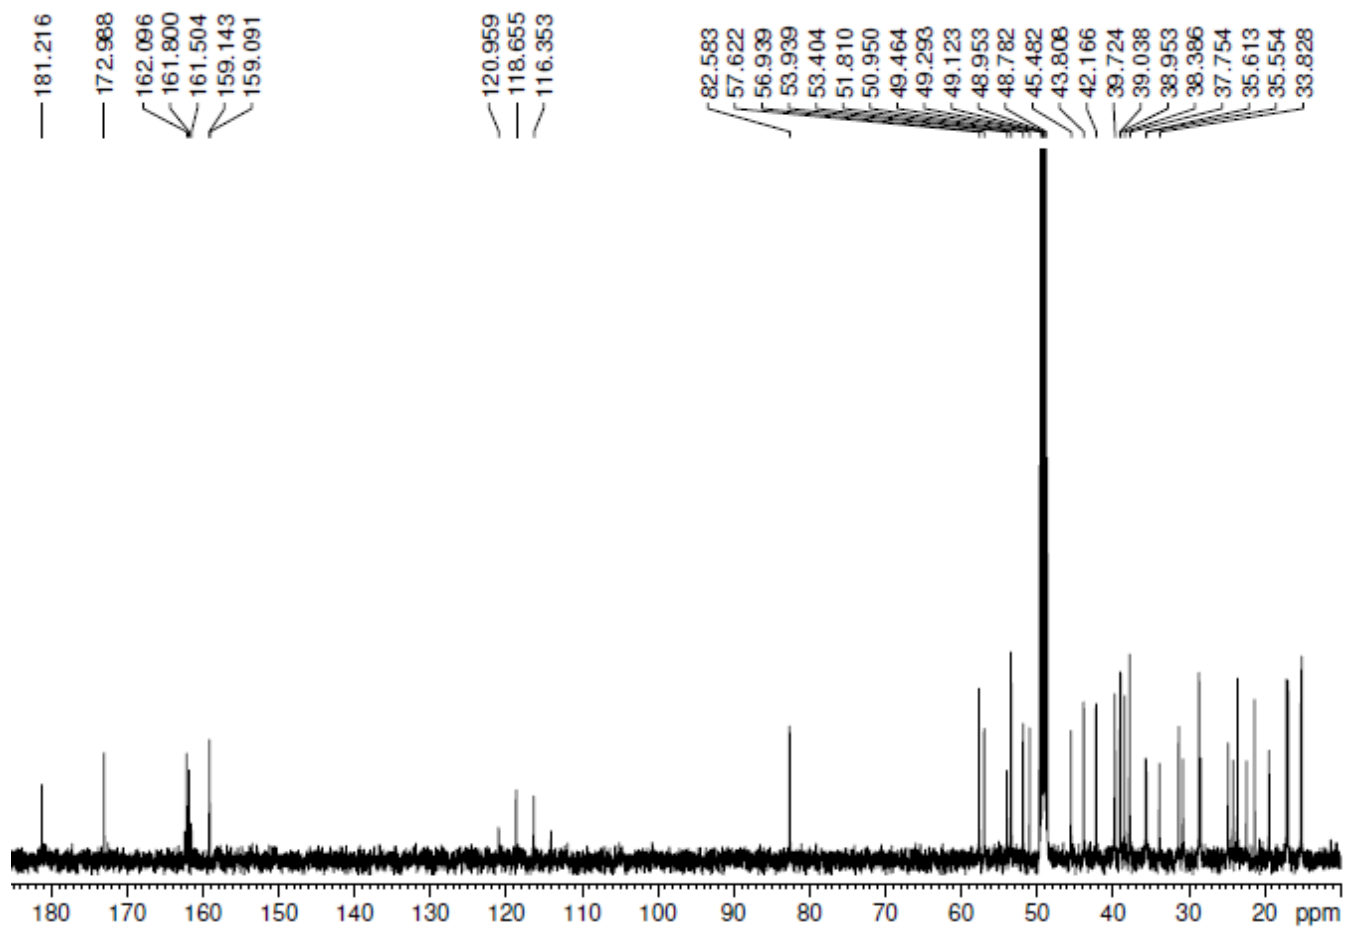

**3 $\beta$ -N-[2-(N,N'-bis-ethylguanidine)-ethyl]-3- O-acetyl -lupane-28-amide trifluoroacetate (12a).**

<sup>19</sup>F NMR spectra (MeOD)

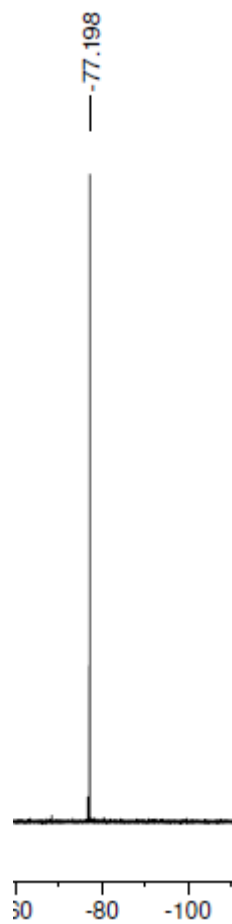

**3 $\beta$ -N-[[3-(3-propylguanidine)piperazinyl]propyl]-3-O-acetyl-lupane-28-amide trifluoroacetate (13a).**

<sup>1</sup>H NMR spectra (MeOD)

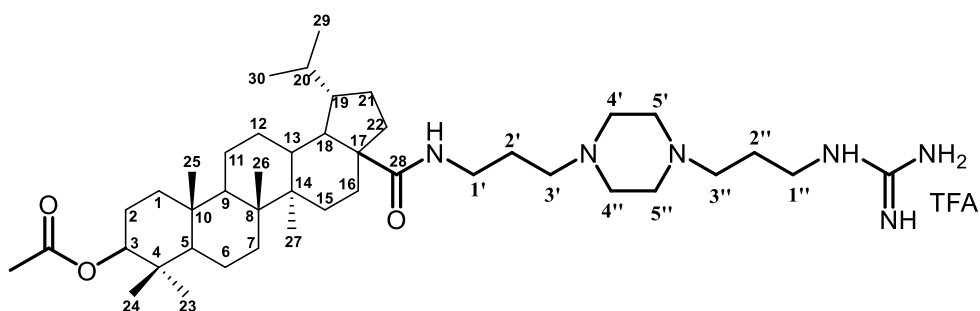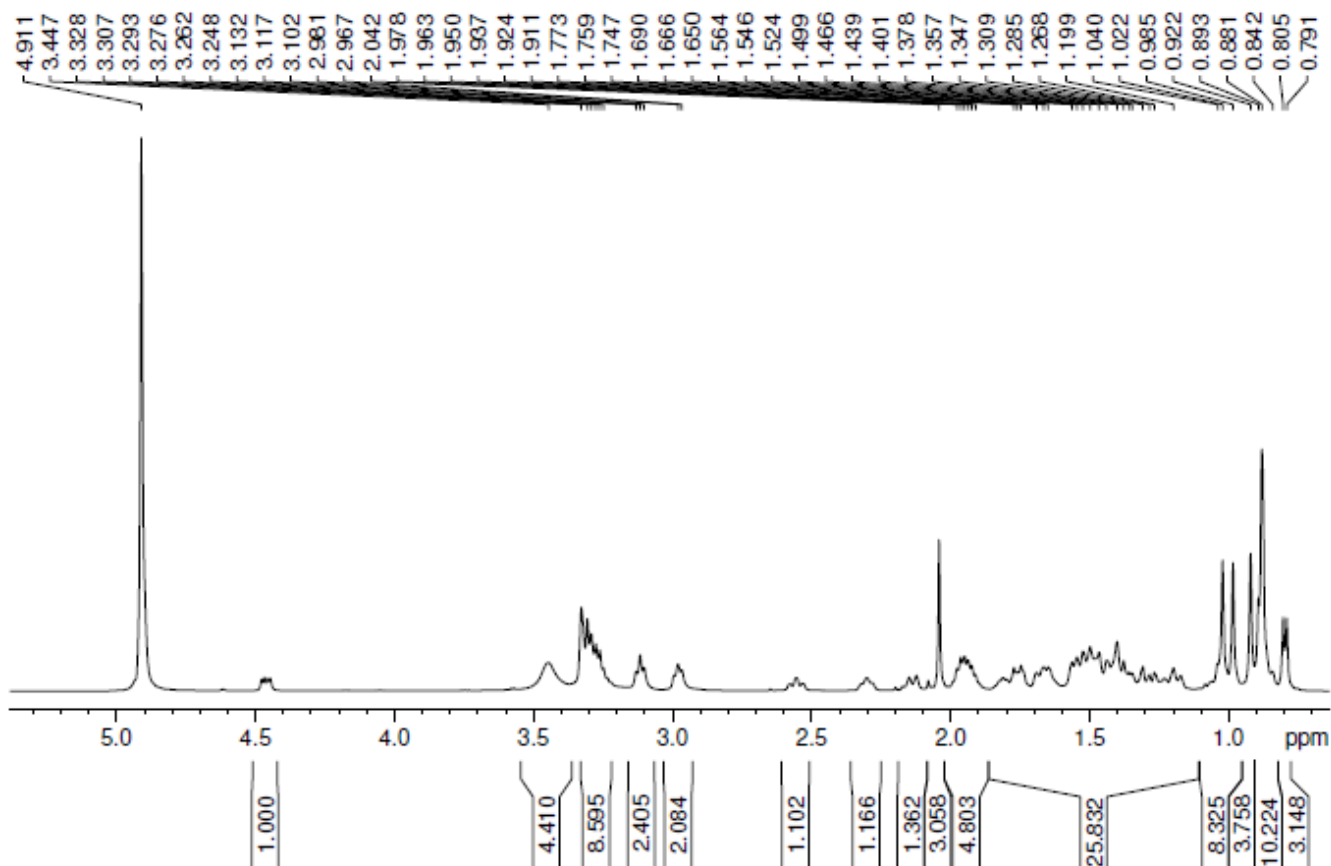

**3 $\beta$ -N-[[3-(3-propylguanidine)piperazinyl]propyl]-3-O-acetyl-lupane-28-amide trifluoroacetate (13a).**

<sup>13</sup>C NMR spectra (MeOD)

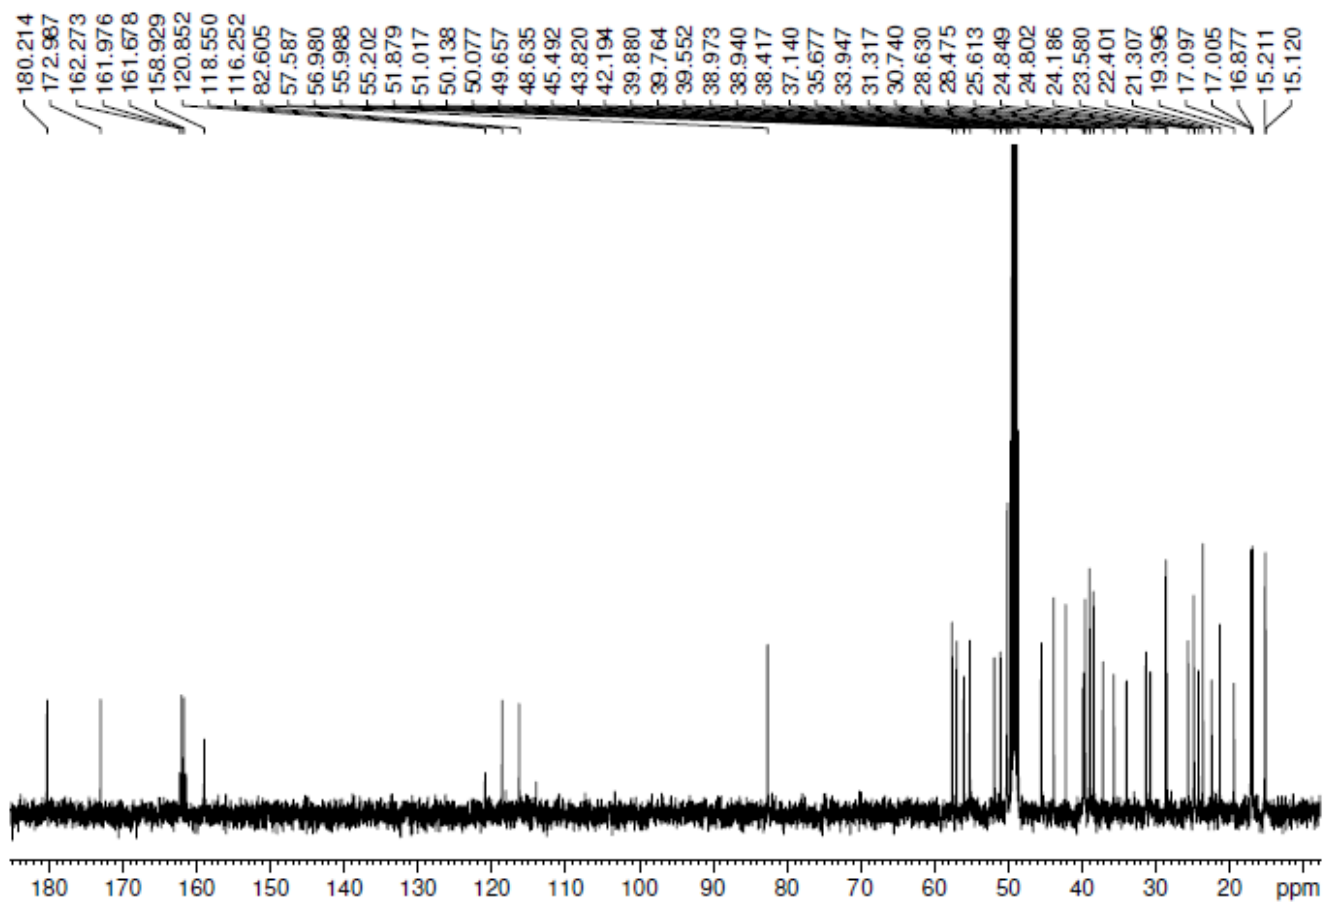

**3 $\beta$ -N-[[3-(3-propylguanidine)piperazinyl]propyl]-3-O-acetyl-lupane-28-amide trifluoroacetate (13a).**

<sup>19</sup>F NMR spectra (MeOD)

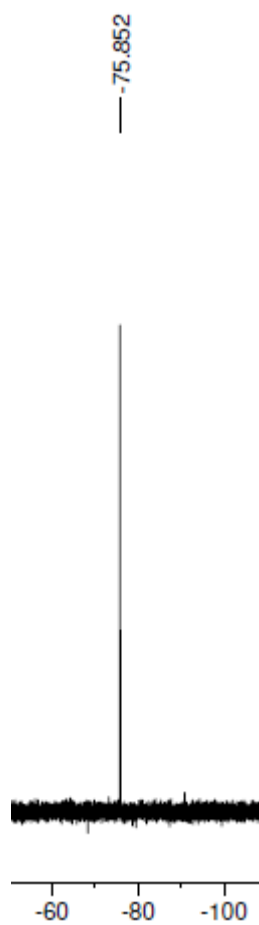

**3 $\beta$ -[2-guanidino-3-hydroxy-2-(hydroxymethyl)propyl]-3-O-acetyl-lupane-28-oate trifluoroacetate (15b). <sup>1</sup>H NMR spectra (CDCl<sub>3</sub>)**

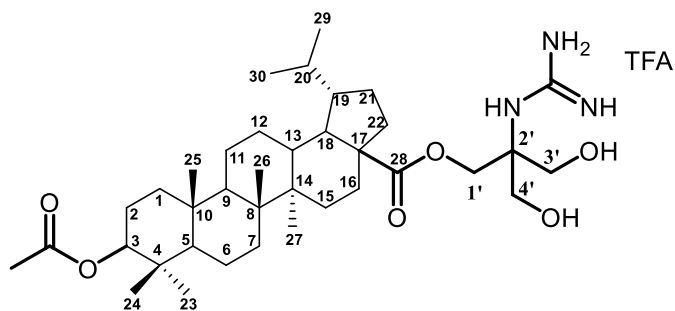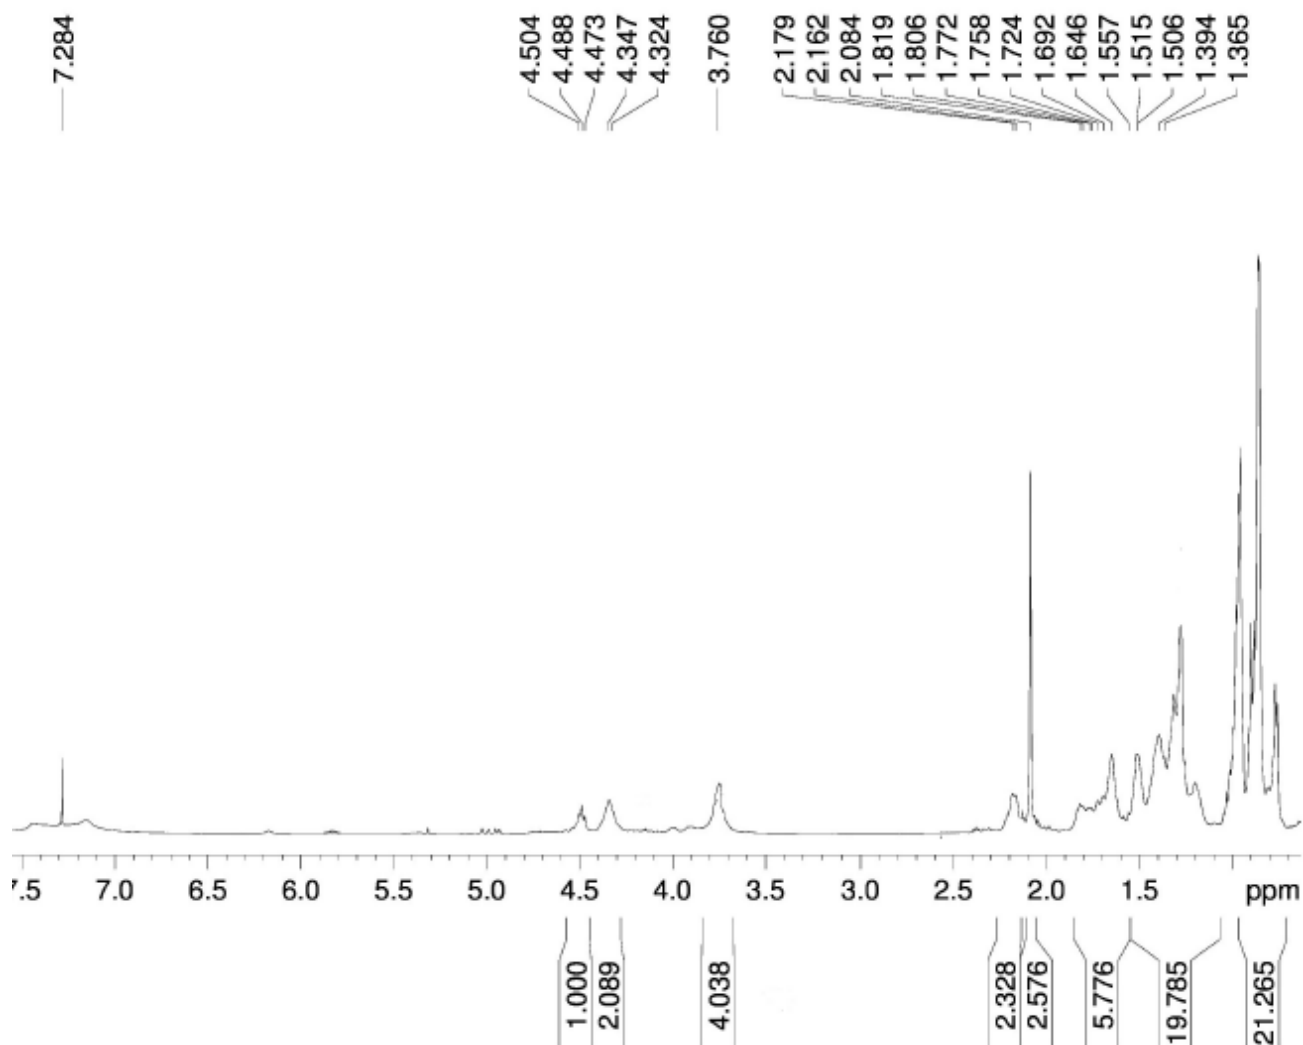

**3 $\beta$ -[2-guanidine-3-hydroxy-2-(hydroxymethyl)propyl]-3-O-acetyl-lupane-28-oate trifluoroacetate (15b). <sup>13</sup>C NMR spectra (CDCl<sub>3</sub>)**

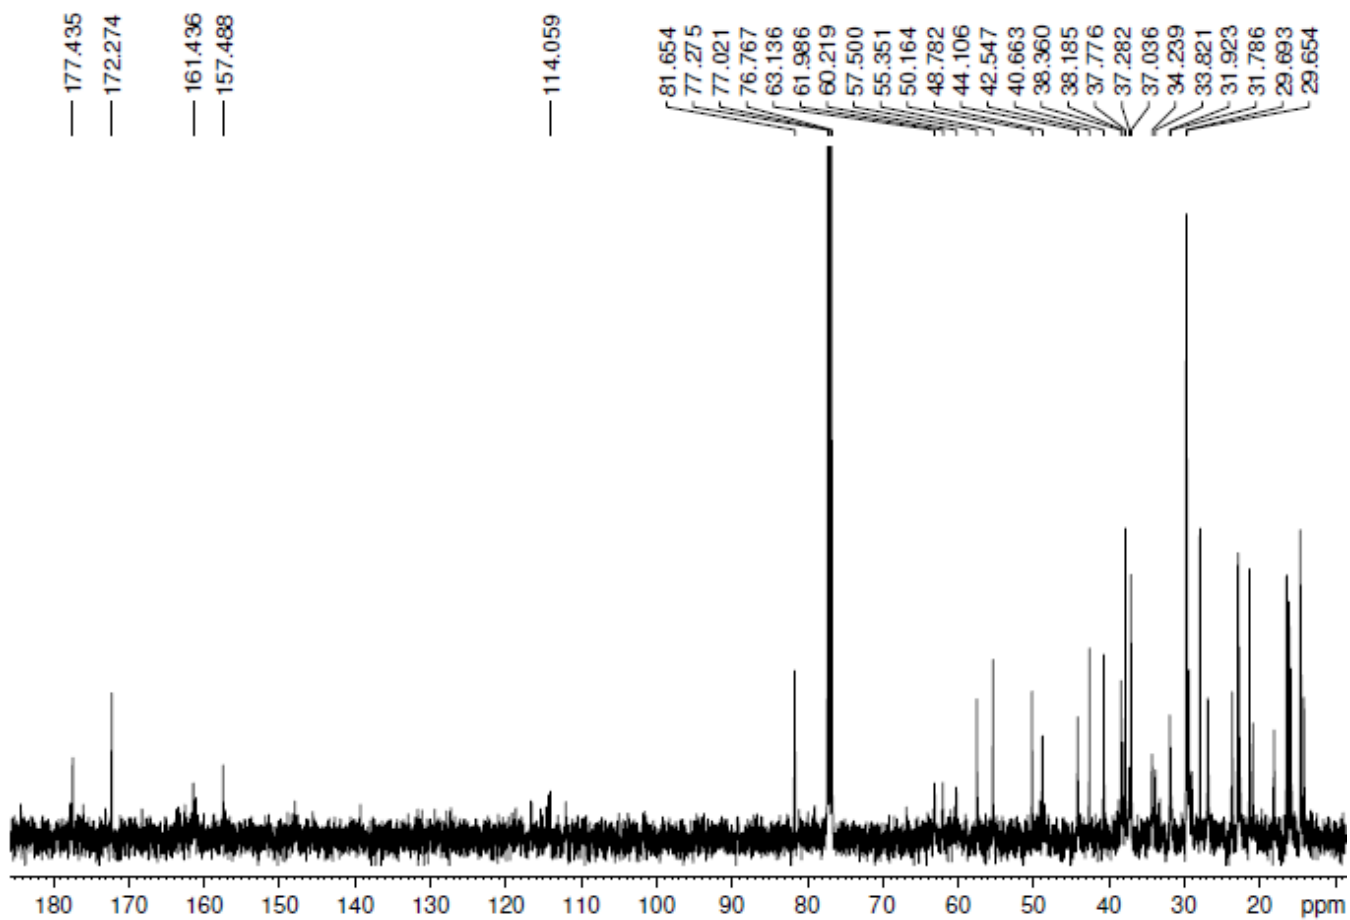

**3 $\beta$ -[2-guanidine-3-hydroxy-2-(hydroxymethyl)propyl]-3-O-acetyl-lupane-28-oate trifluoroacetate (15b). <sup>19</sup>F NMR spectra (CDCl<sub>3</sub>)**

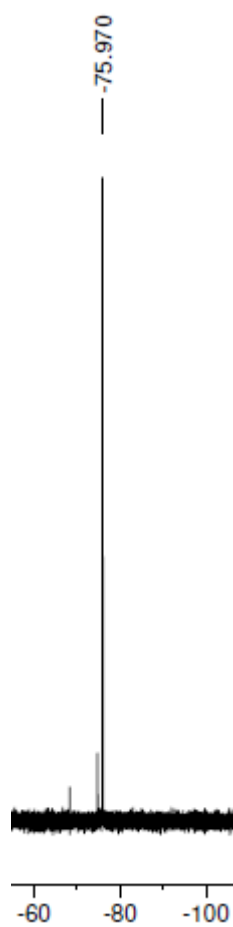



**3 $\beta$ -[2-guanidine-3-hydroxy-2-(hydroxymethyl)propyl]-3-O-acetyl-urs-12-en-28-oate trifluoroacetate (18b). <sup>1</sup>H NMR spectra (MeOD)**

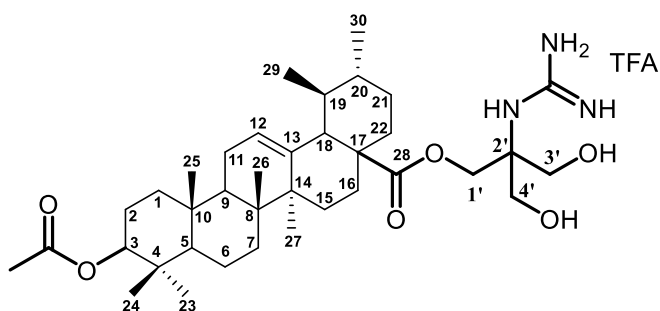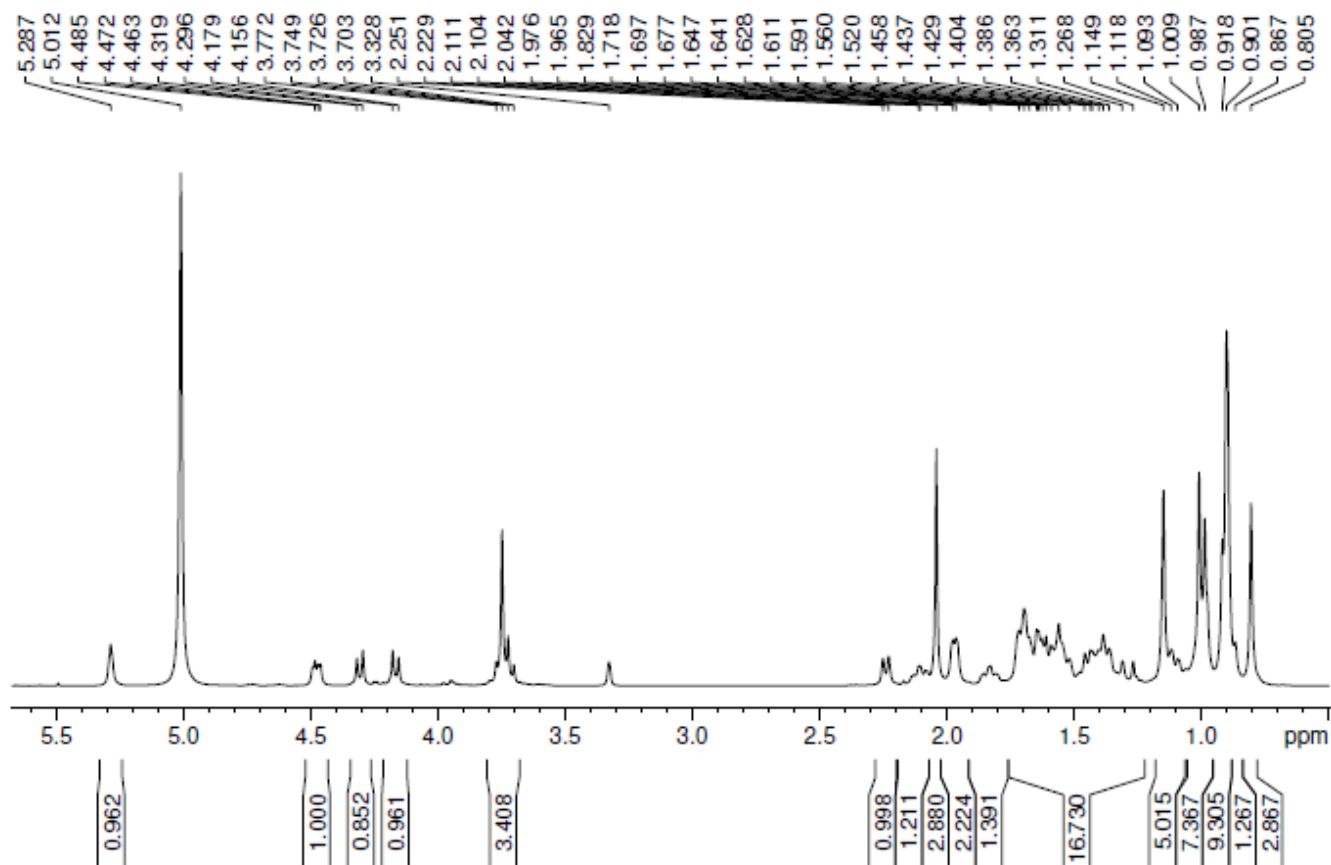

**3 $\beta$ -[2-guanidine-3-hydroxy-2-(hydroxymethyl)propyl]-3-O-acetyl-urs-12-en-28-oate trifluoroacetate (18b). <sup>13</sup>C NMR spectra (MeOD)**

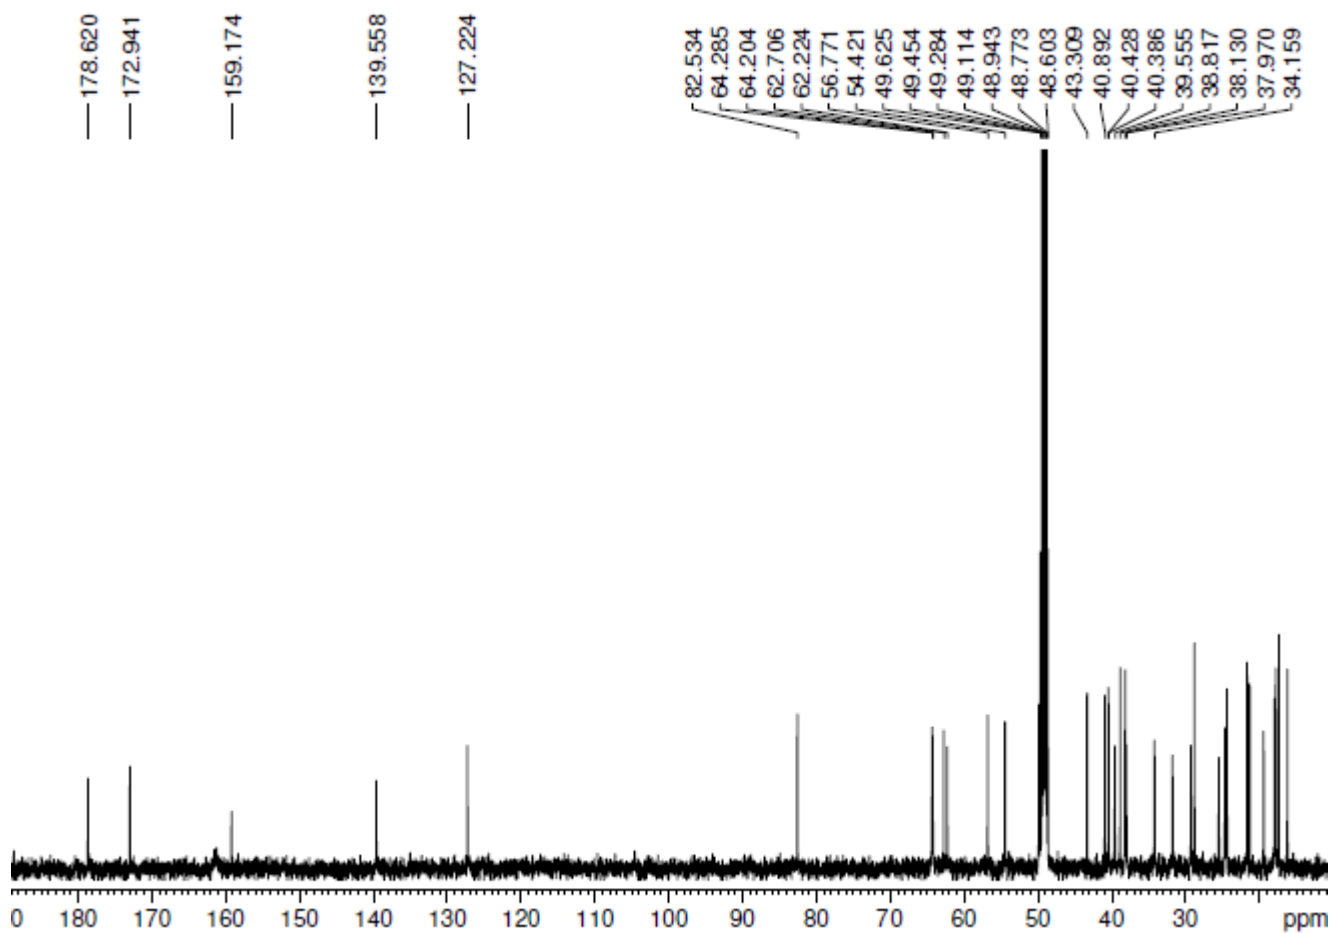

**3 $\beta$ -[2-guanidine-3-hydroxy-2-(hydroxymethyl)propyl]-3-O-acetyl-urs-12-en-28-oate trifluoroacetate (18b). <sup>19</sup>F NMR spectra (MeOD)**

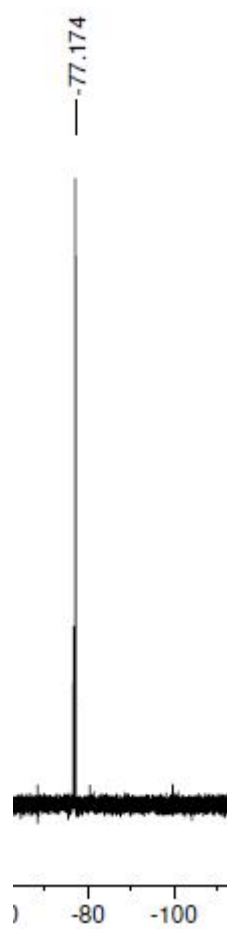

**3 $\beta$ -[2-guanidine-3-hydroxy-2-(hydroxymethyl)propyl]-3-O-acetyl-olean-12-en-28-oate trifluoroacetate (20b).  $^1\text{H}$  NMR spectra (MeOD)**

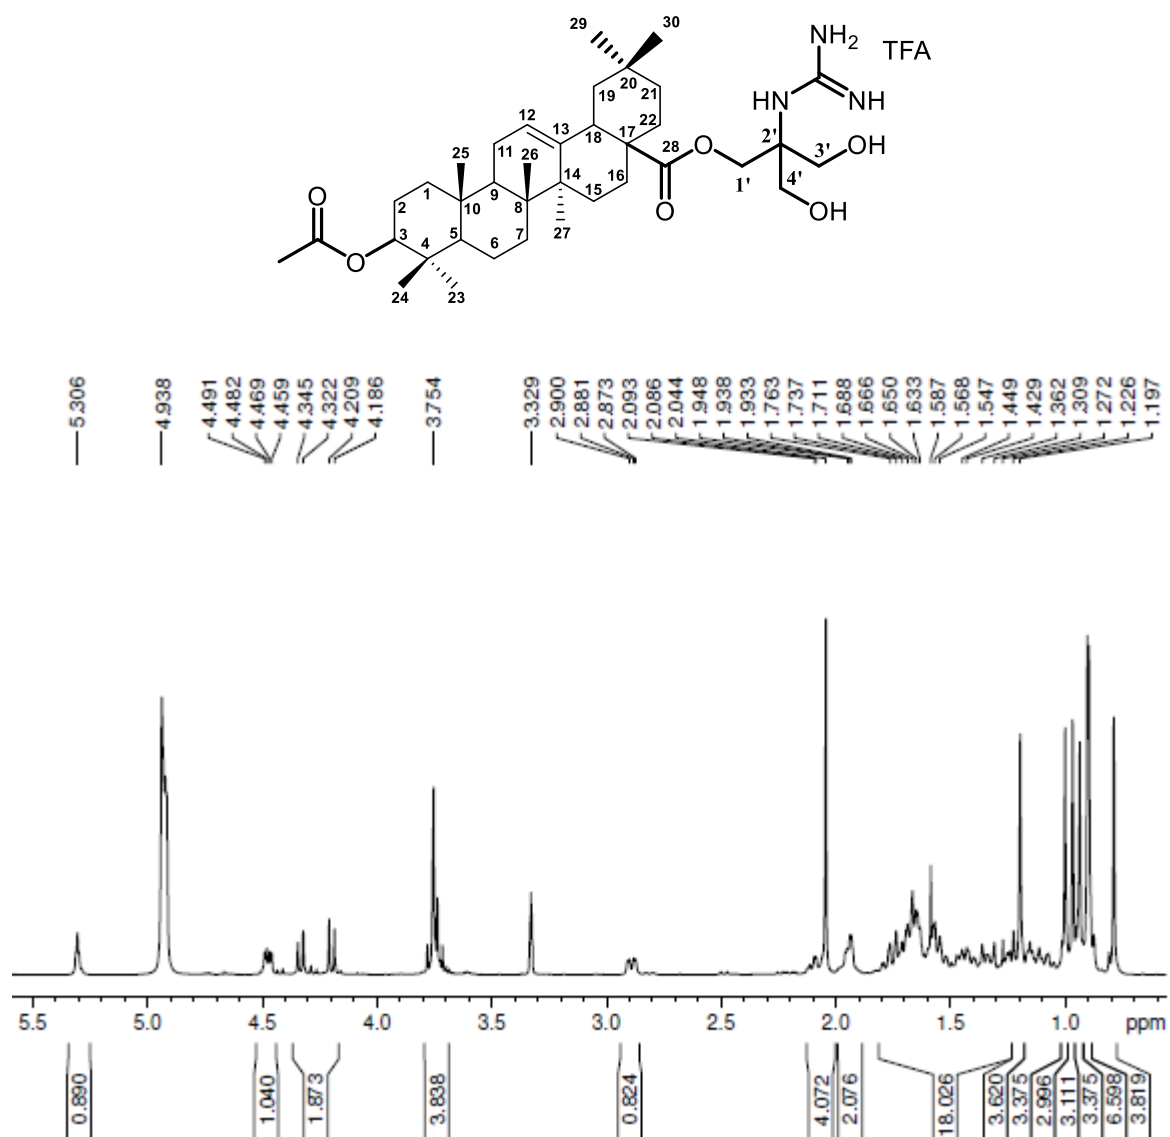

**3 $\beta$ -[2-guanidine-3-hydroxy-2-(hydroxymethyl)propyl]-3-O-acetyl-olean-12-en-28-oate trifluoroacetate (20b). <sup>13</sup>C NMR spectra (MeOD)**

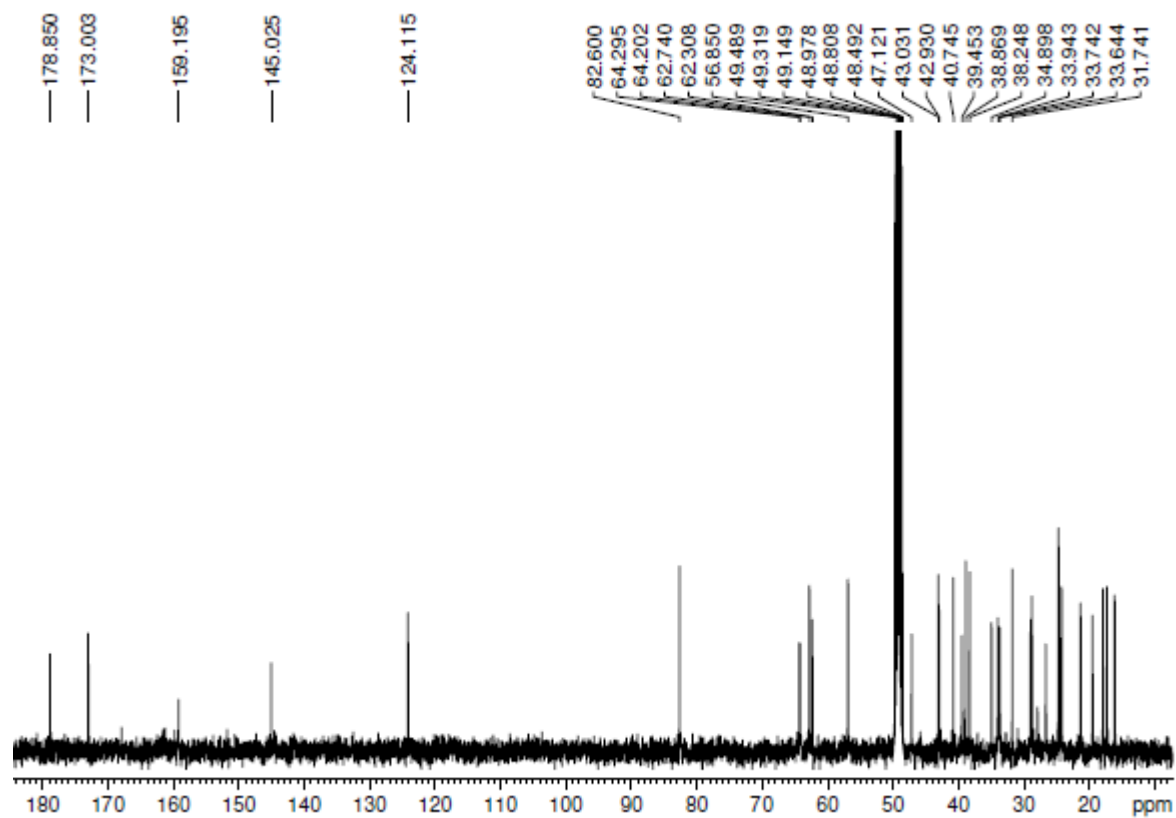

**3 $\beta$ -[2-guanidine-3-hydroxy-2-(hydroxymethyl)propyl]-3-O-acetyl-olean-12-en-28-oate trifluoroacetate (20b). <sup>19</sup>F NMR spectra (MeOD)**

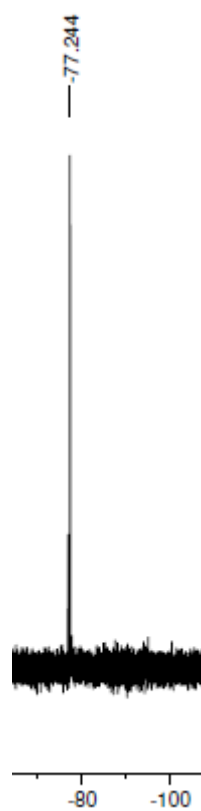

# N-(4-buthylguanidine)-3-oxolupane-28-amide dihydrochloride (9b).

<sup>1</sup>H NMR spectra (d<sub>6</sub>-DMSO)

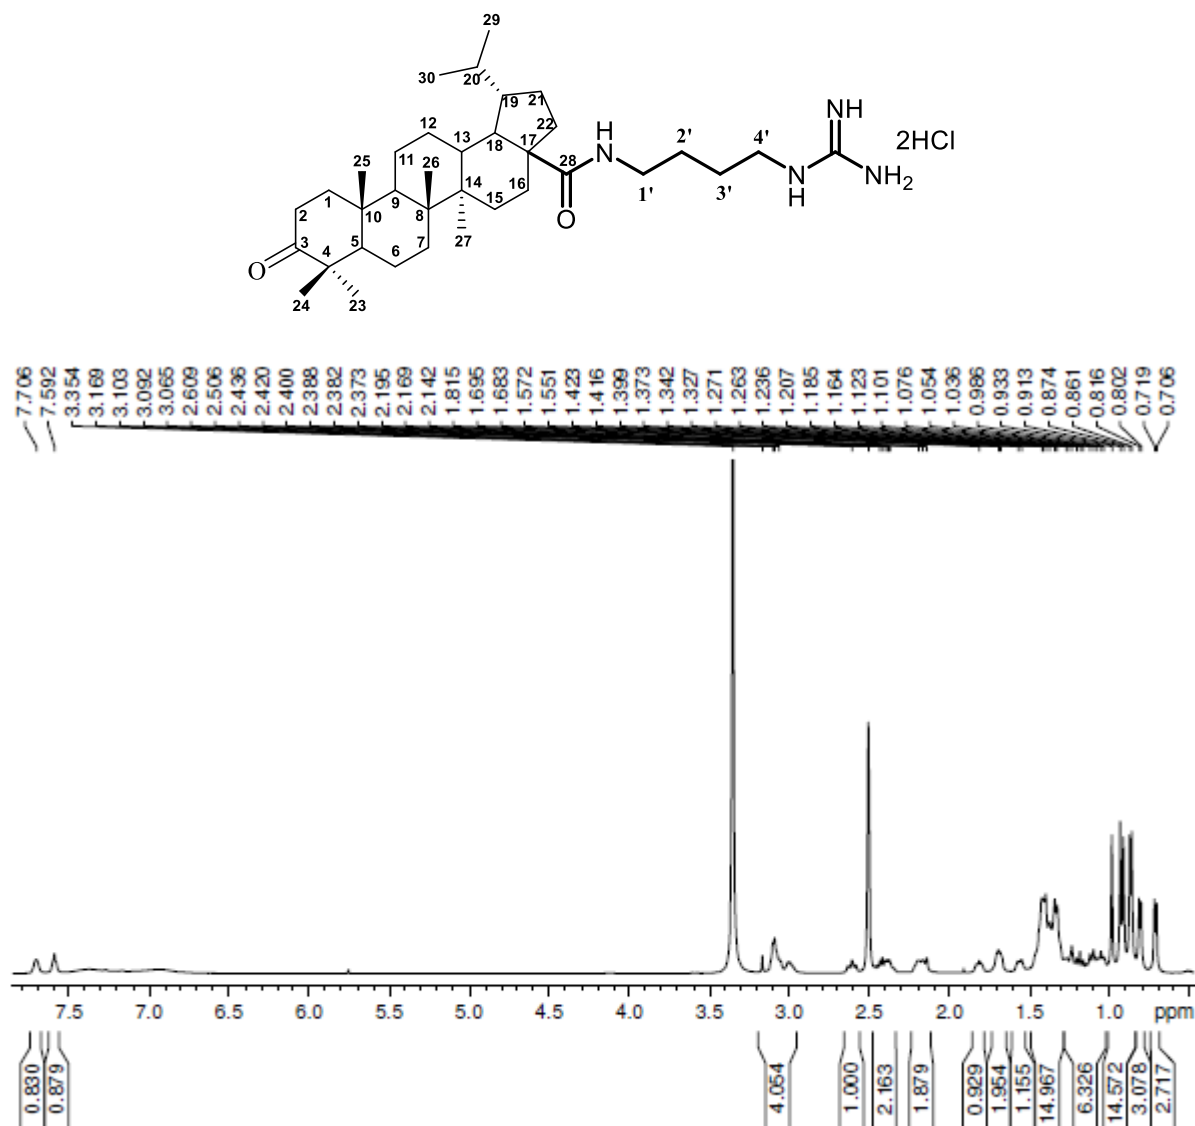

**N-(4-buthylguanidine)-3-oxolupane-28-amide dihydrochloride (9b).**

$^{13}\text{C}$  NMR spectra ( $\text{d}_6\text{-DMSO}$ )

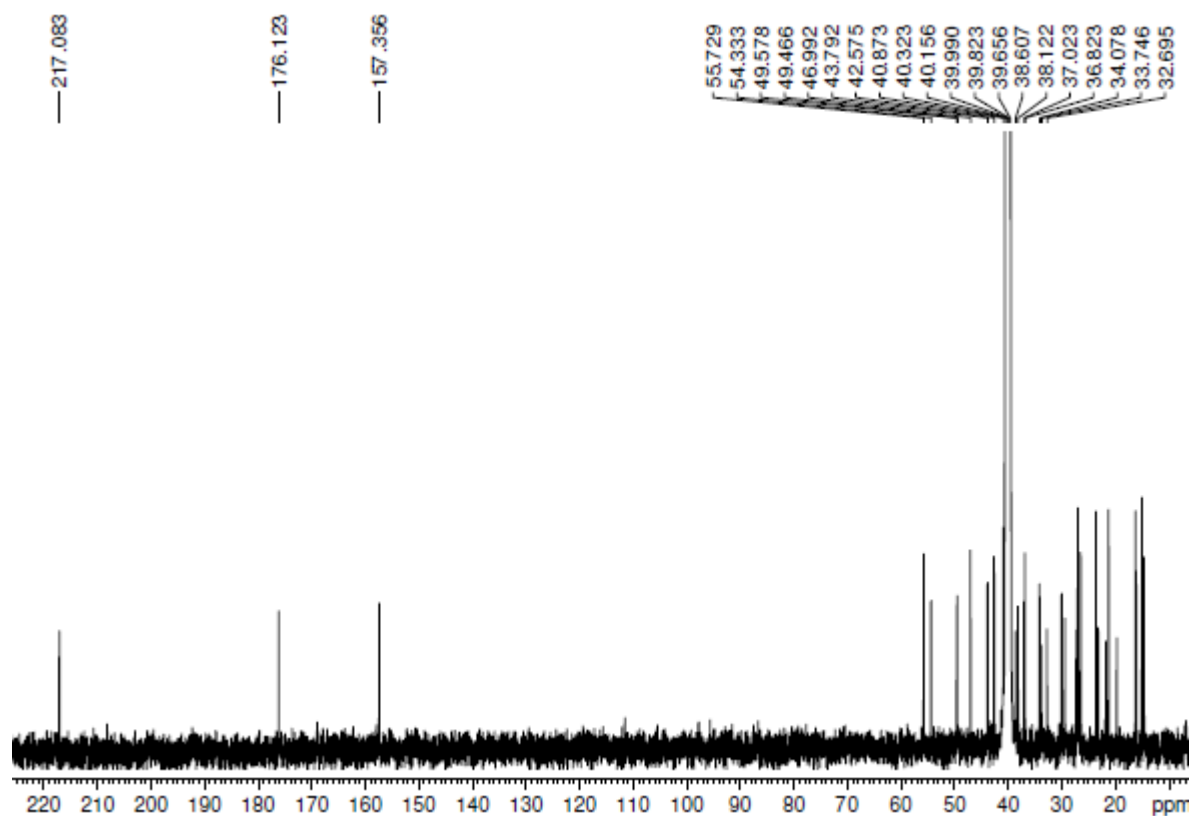



**3 $\beta$ -N-(2-ethylguanidine)-3-O-acetyl-lupane-28-amide hydrochloride (10b).**

<sup>1</sup>H NMR spectra (MeOD)

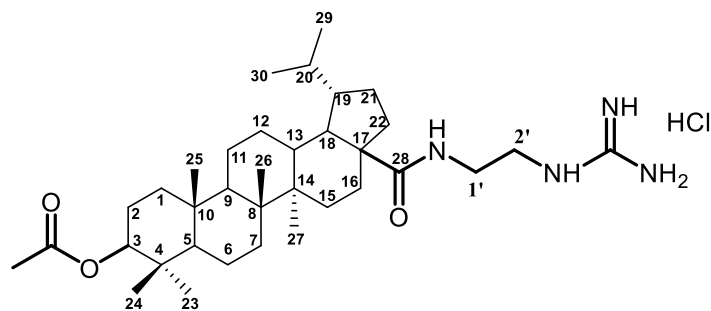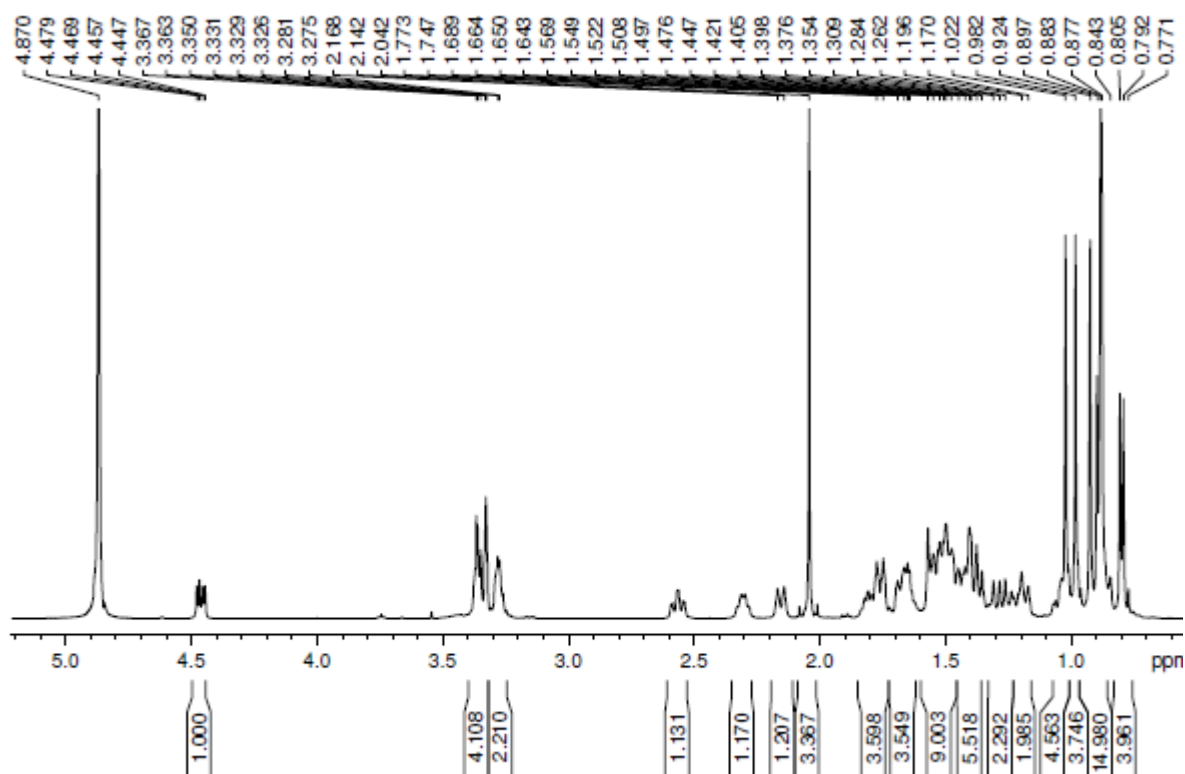

**3 $\beta$ -N-(2-ethylguanidine)-3-O-acetyl-lupane-28-amide hydrochloride (10b).**

<sup>1</sup>H NMR spectra (MeOD)

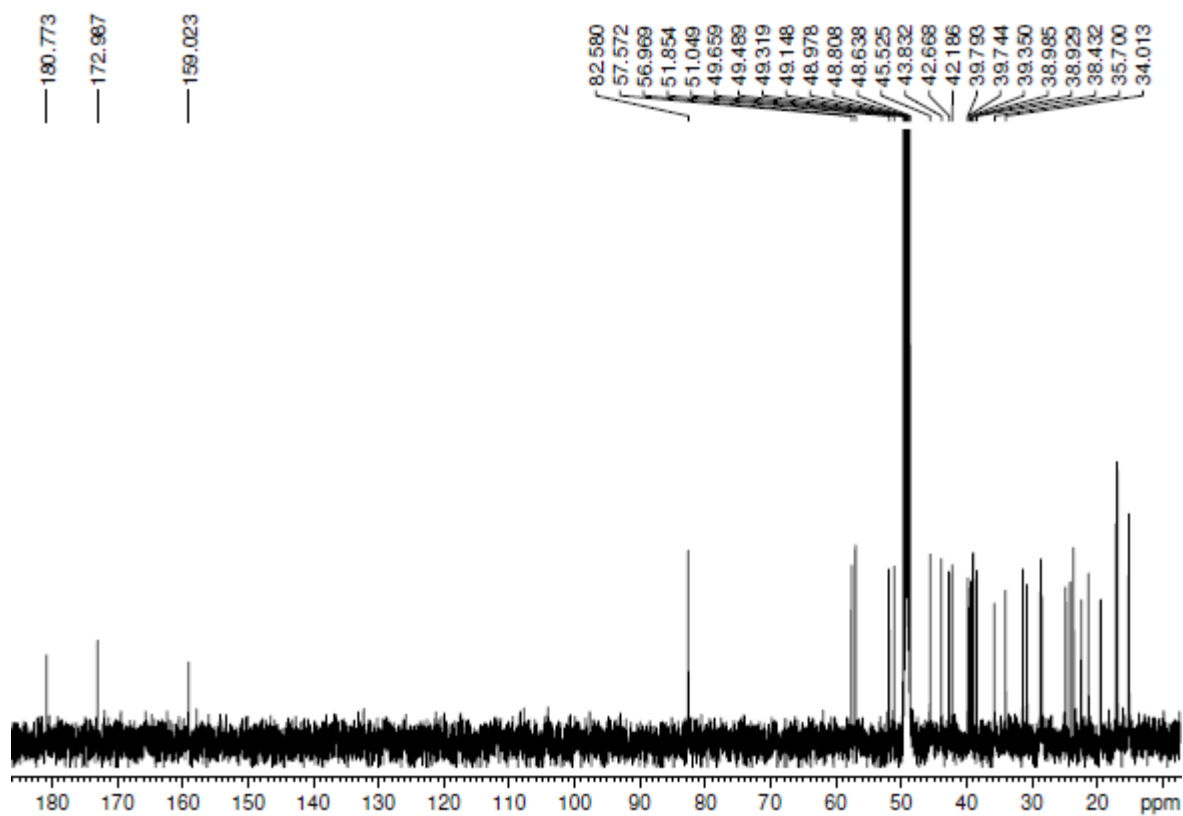

### 3 $\beta$ -N-(4-buthylguanidine)-3-O-acetyl-lupane-28-amide hydrochloride (11b).

<sup>1</sup>H NMR spectra (MeOD)

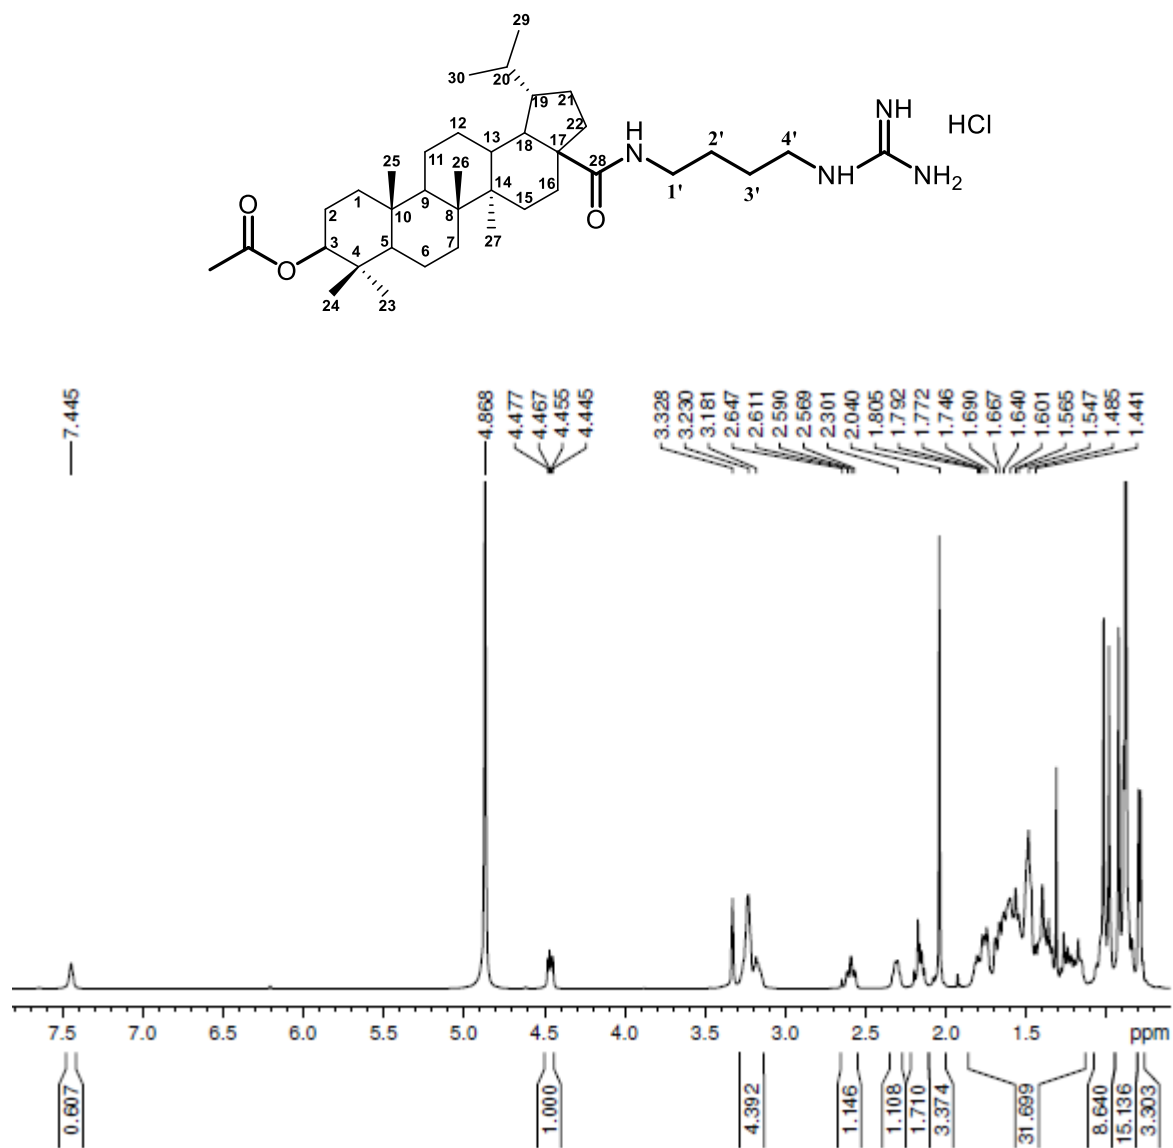

**3 $\beta$ -N-(4-buthylguanidine)-3-O-acetyl-lupane-28-amide hydrochloride (11b).**

<sup>13</sup>C NMR spectra (MeOD)

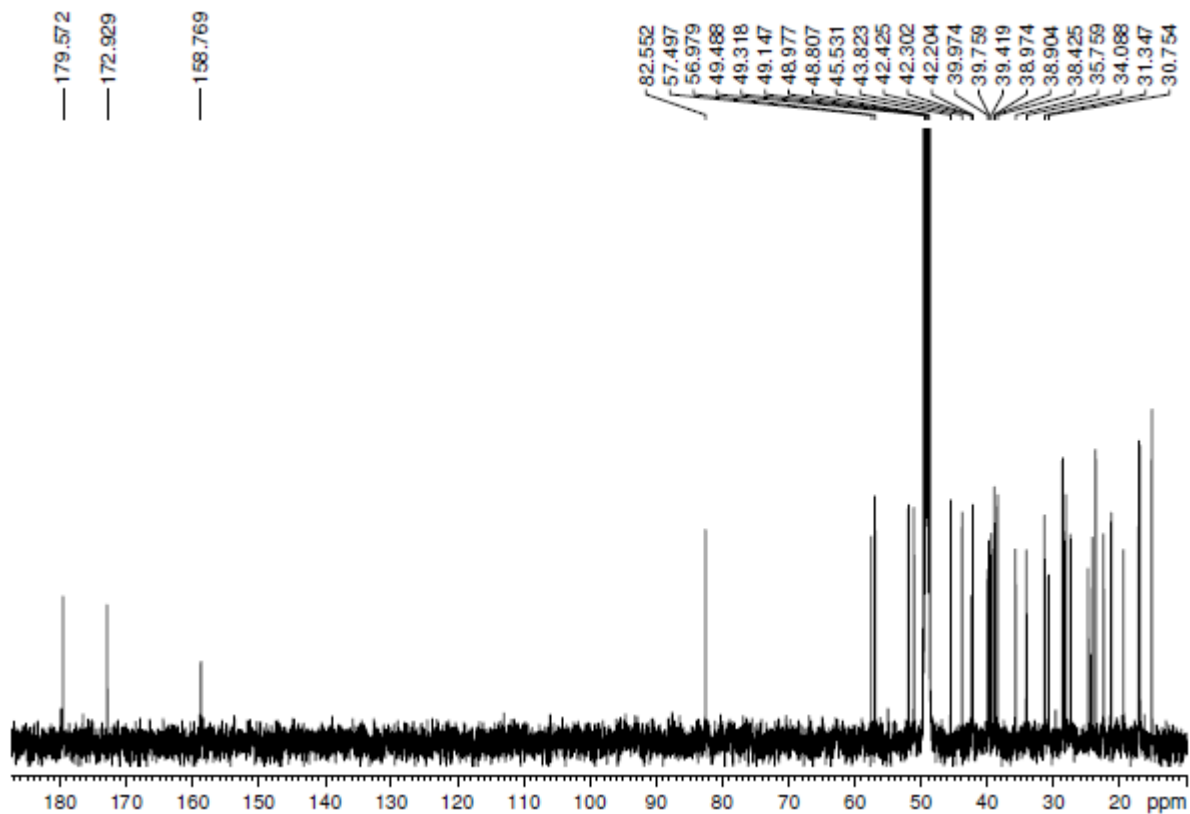

**3 $\beta$ -N-[2-(N,N'-bis-ethylguanidine)-ethyl]-3-O-acetyl-lupane-28-amide dihydrochloride (12b).**

<sup>1</sup>H NMR spectra (MeOD)

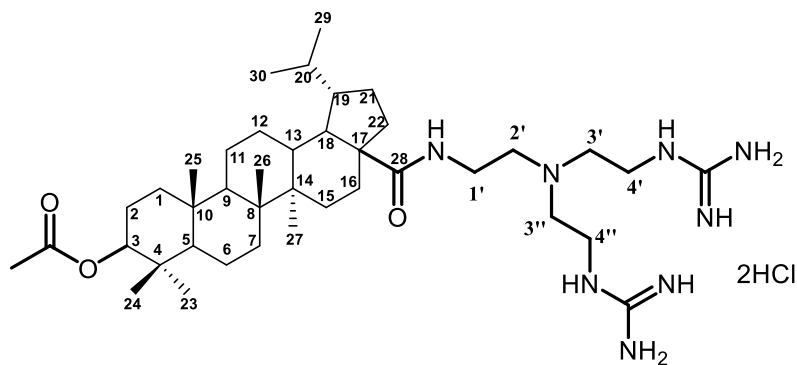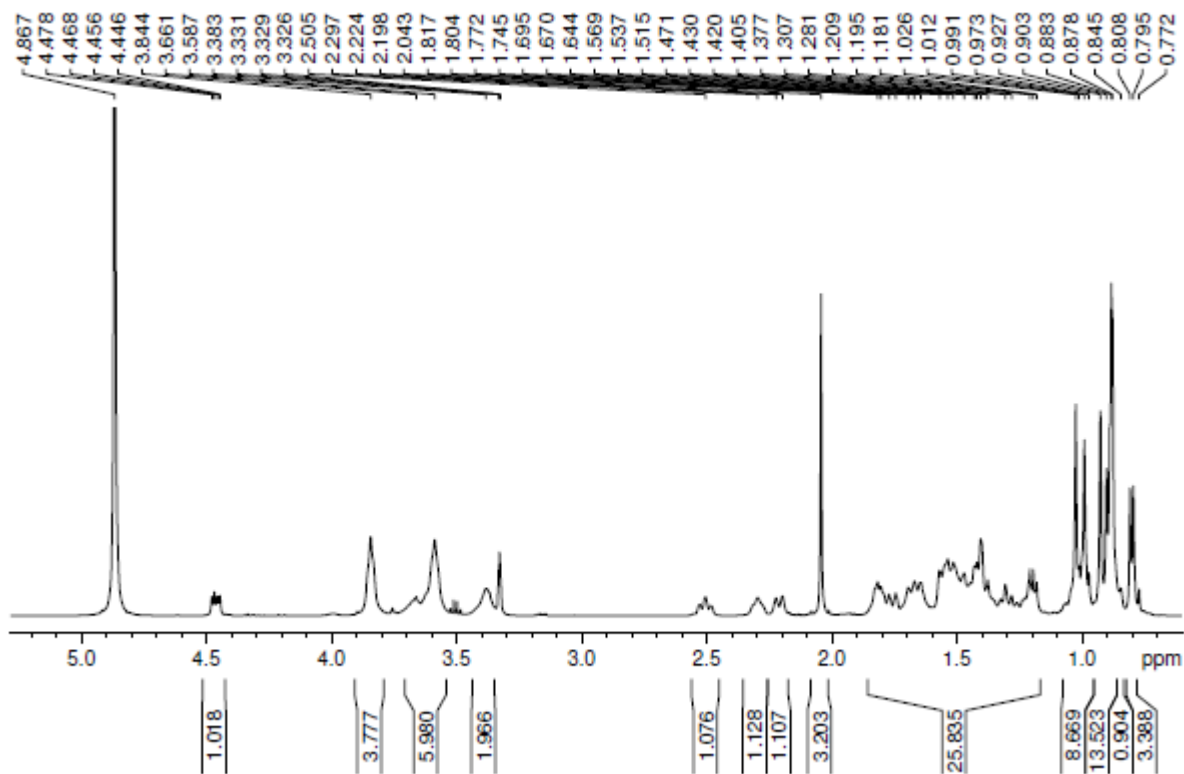

**3 $\beta$ -N-[2-(N,N'-bis-ethylguanidine)-ethyl]-3-O-acetyl-lupane-28-amide dihydrochloride (12b).**

<sup>13</sup>C NMR spectra (MeOD)

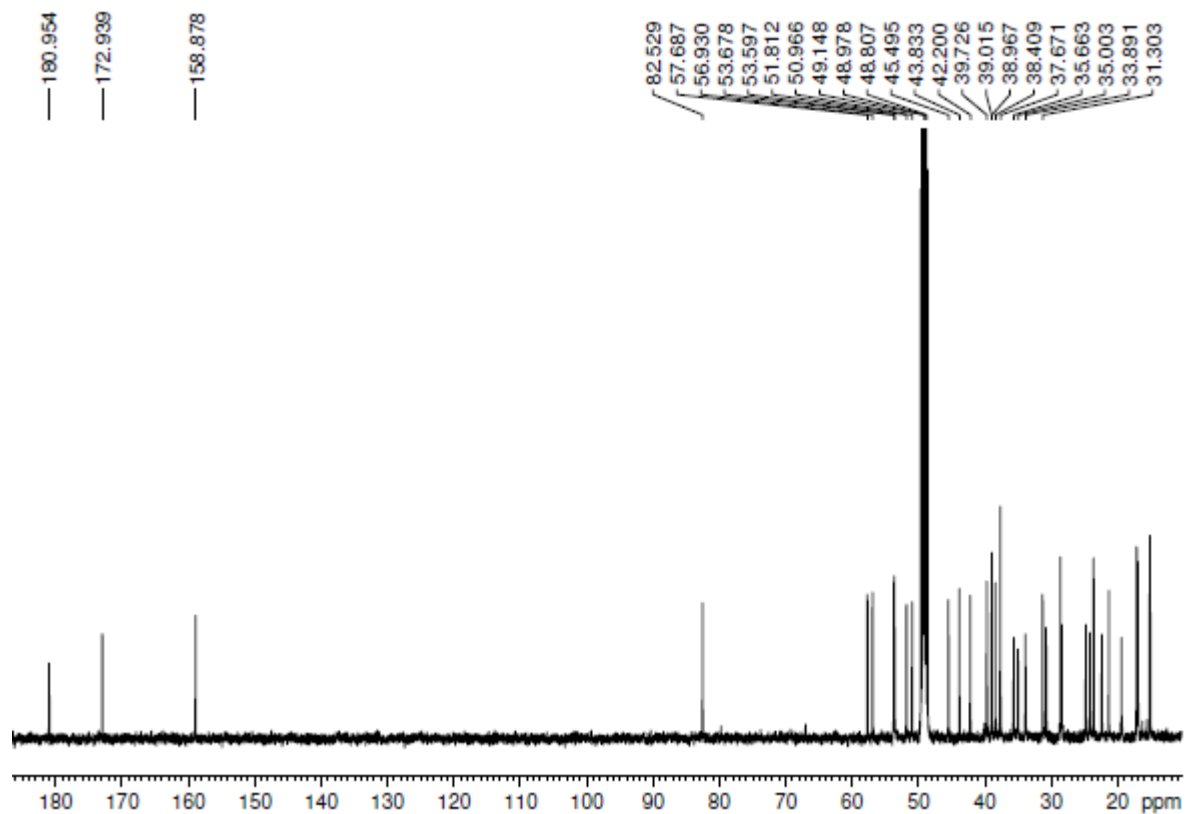

**3 $\beta$ -[2-guanidino-3-hydroxy-2-(hydroxymethyl)propyl]-3-O-acetyl-lupane-28-oate hydrochloride (15c). <sup>1</sup>H NMR spectra (MeOD)**

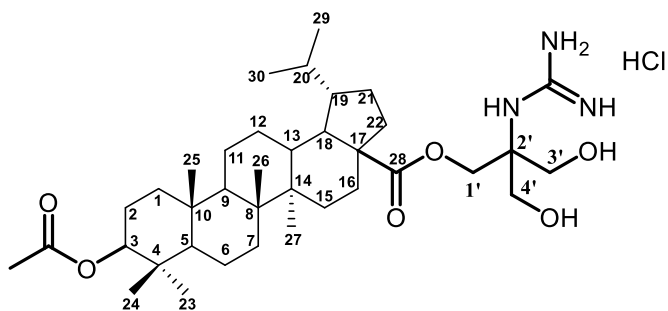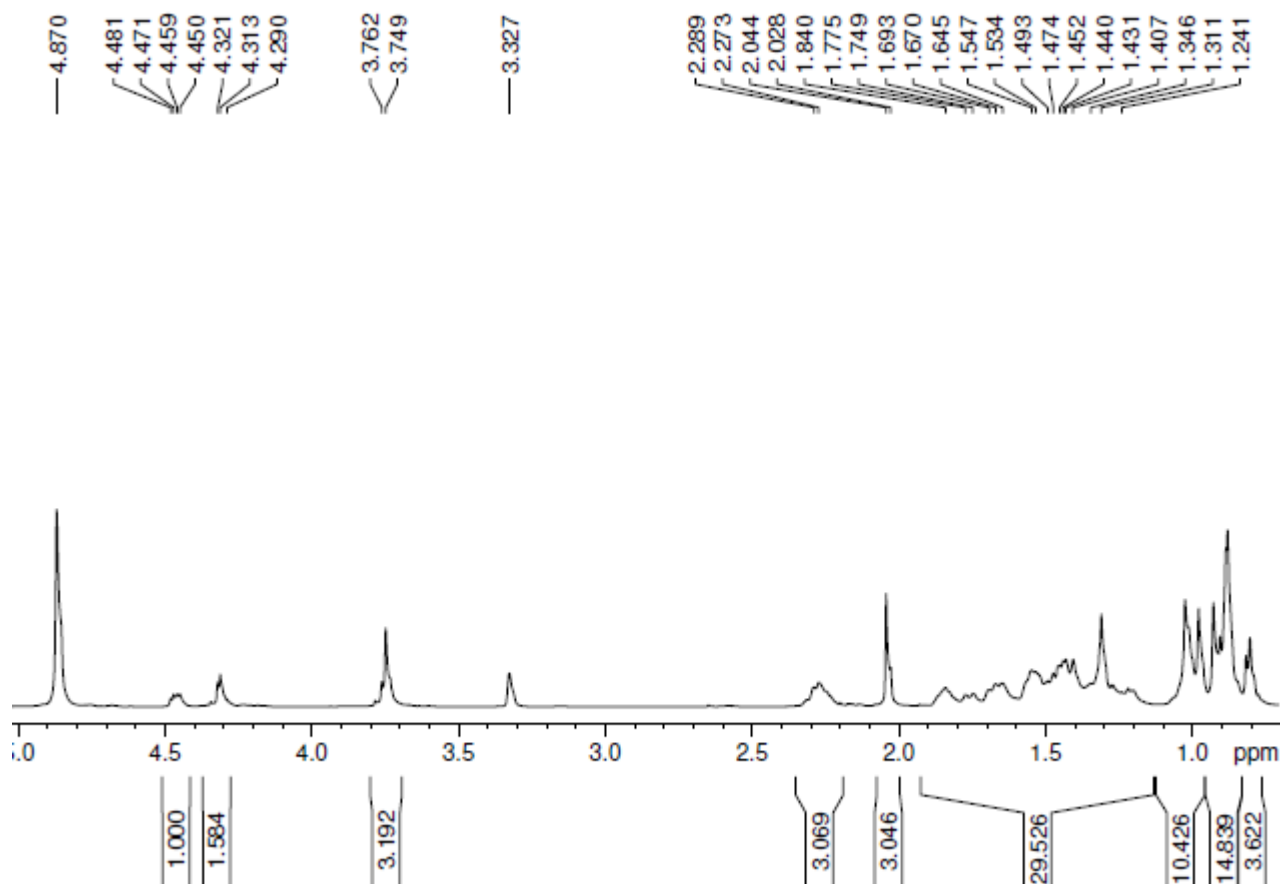

**3 $\beta$ -[2-guanidine-3-hydroxy-2-(hydroxymethyl)propyl]-3-O-acetyl-lupane-28-oate hydrochloride (15c). <sup>13</sup>C NMR spectra (MeOD)**

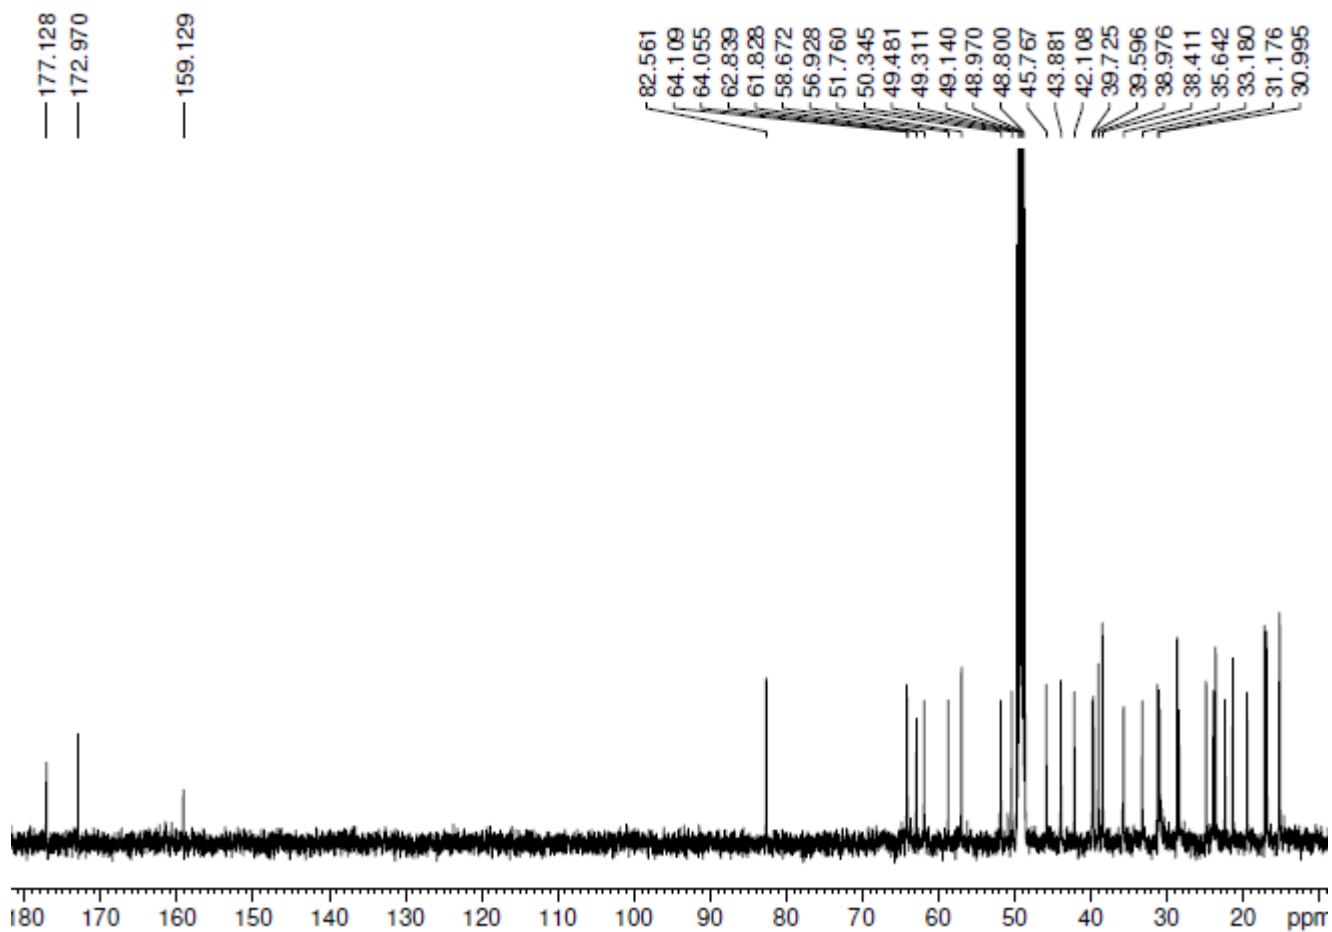



**3 $\beta$ -[2-guanidine-3-hydroxy-2-(hydroxymethyl)propyl]-3-O-acetyl-urs-12-en-28-oate hydrochloride (18c). <sup>1</sup>H NMR spectra (MeOD)**

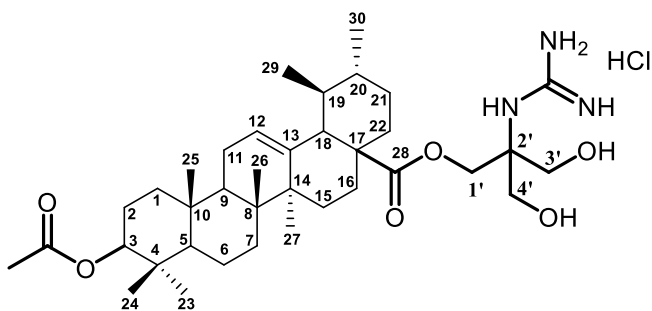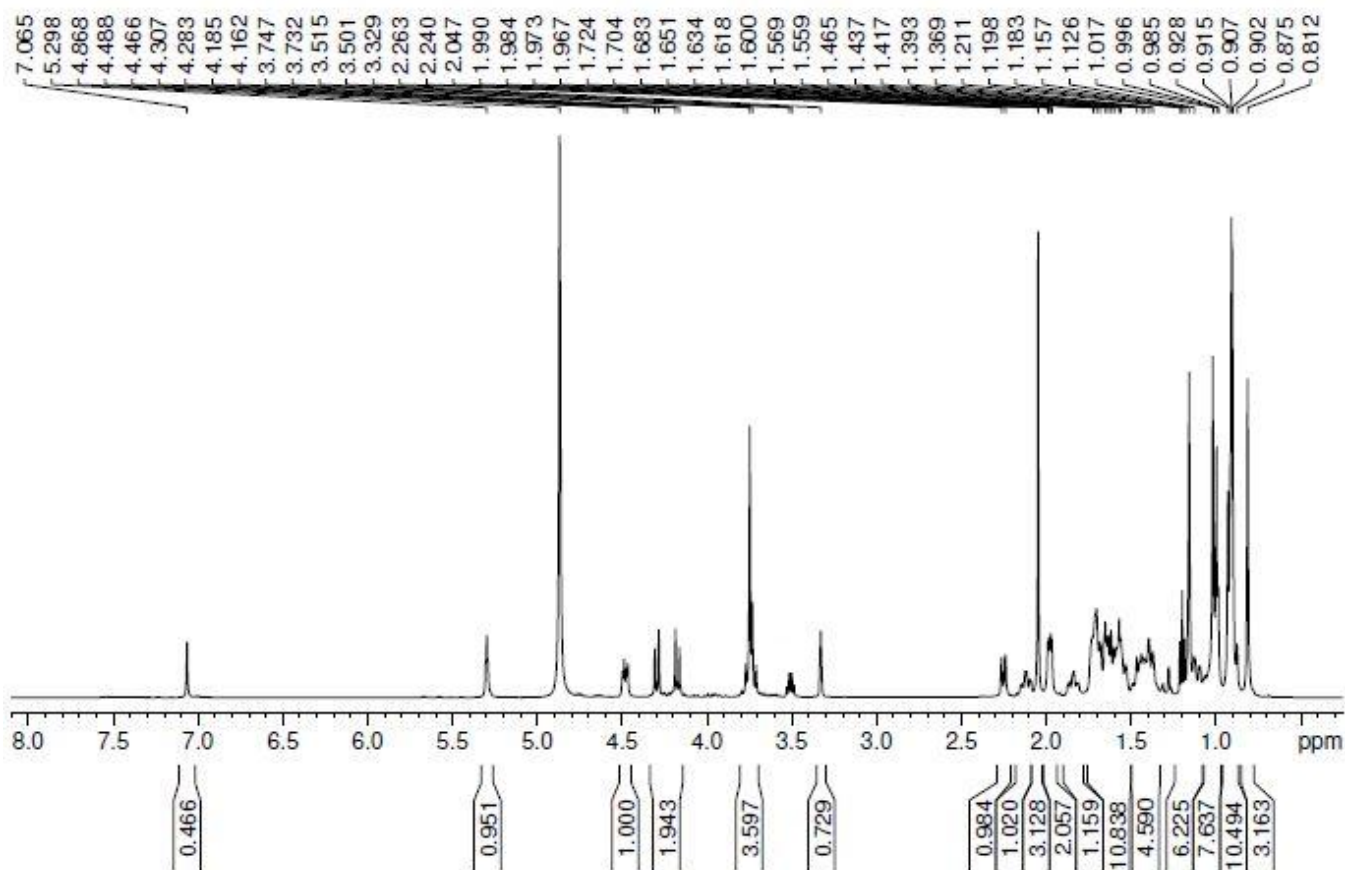

**3 $\beta$ -[2-guanidine-3-hydroxy-2-(hydroxymethyl)propyl]-3-O-acetyl-urs-12-en-28-oate hydrochloride (18c). <sup>13</sup>C NMR spectra (MeOD)**

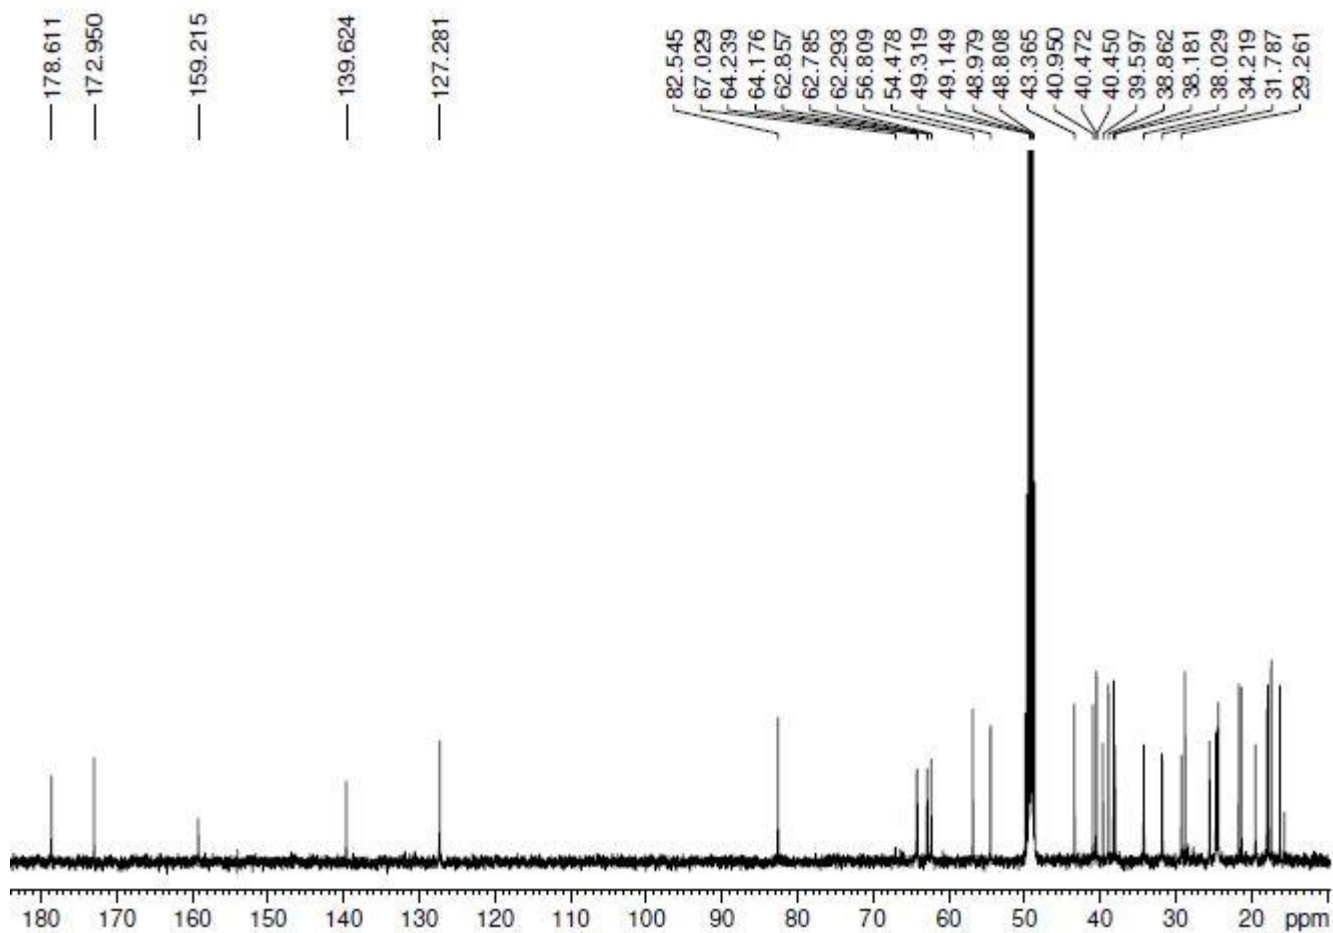

**3β-[2-guanidine-3-hydroxy-2-(hydroxymethyl)propyl]-3-O-acetyl-olean-12-en-28-oate hydrochloride (20c). <sup>1</sup>H NMR spectra (MeOD)**

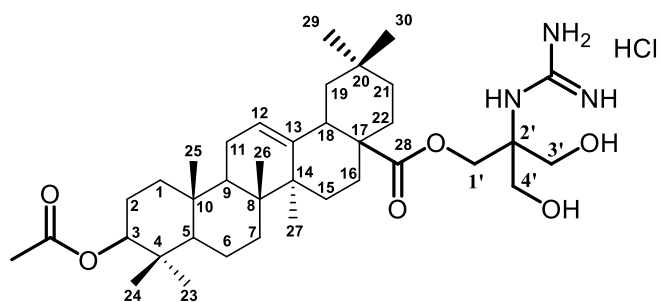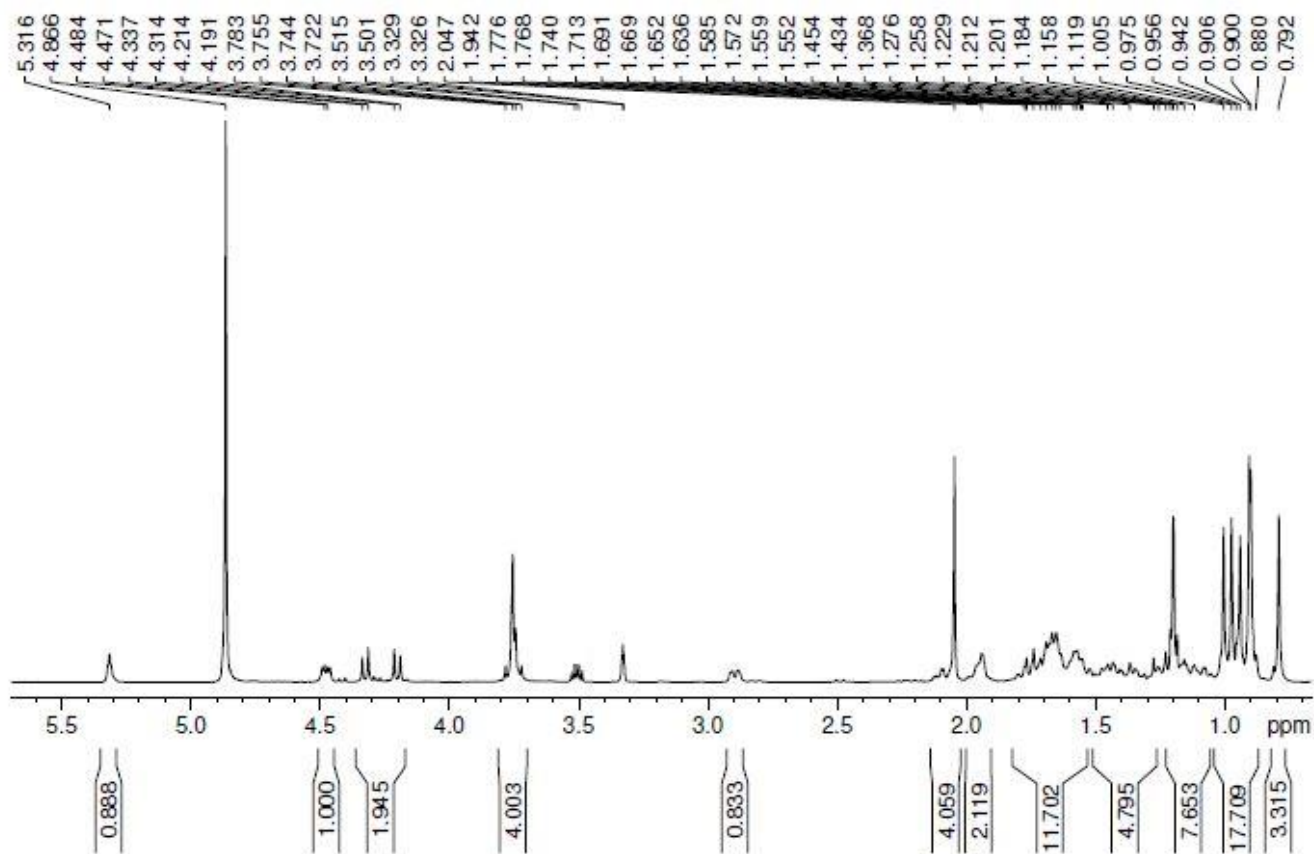

**3 $\beta$ -[2-guanidine-3-hydroxy-2-(hydroxymethyl)propyl]-3-O-acetyl-olean-12-en-28-oate hydrochloride (20c). <sup>13</sup>C NMR spectra (MeOD)**

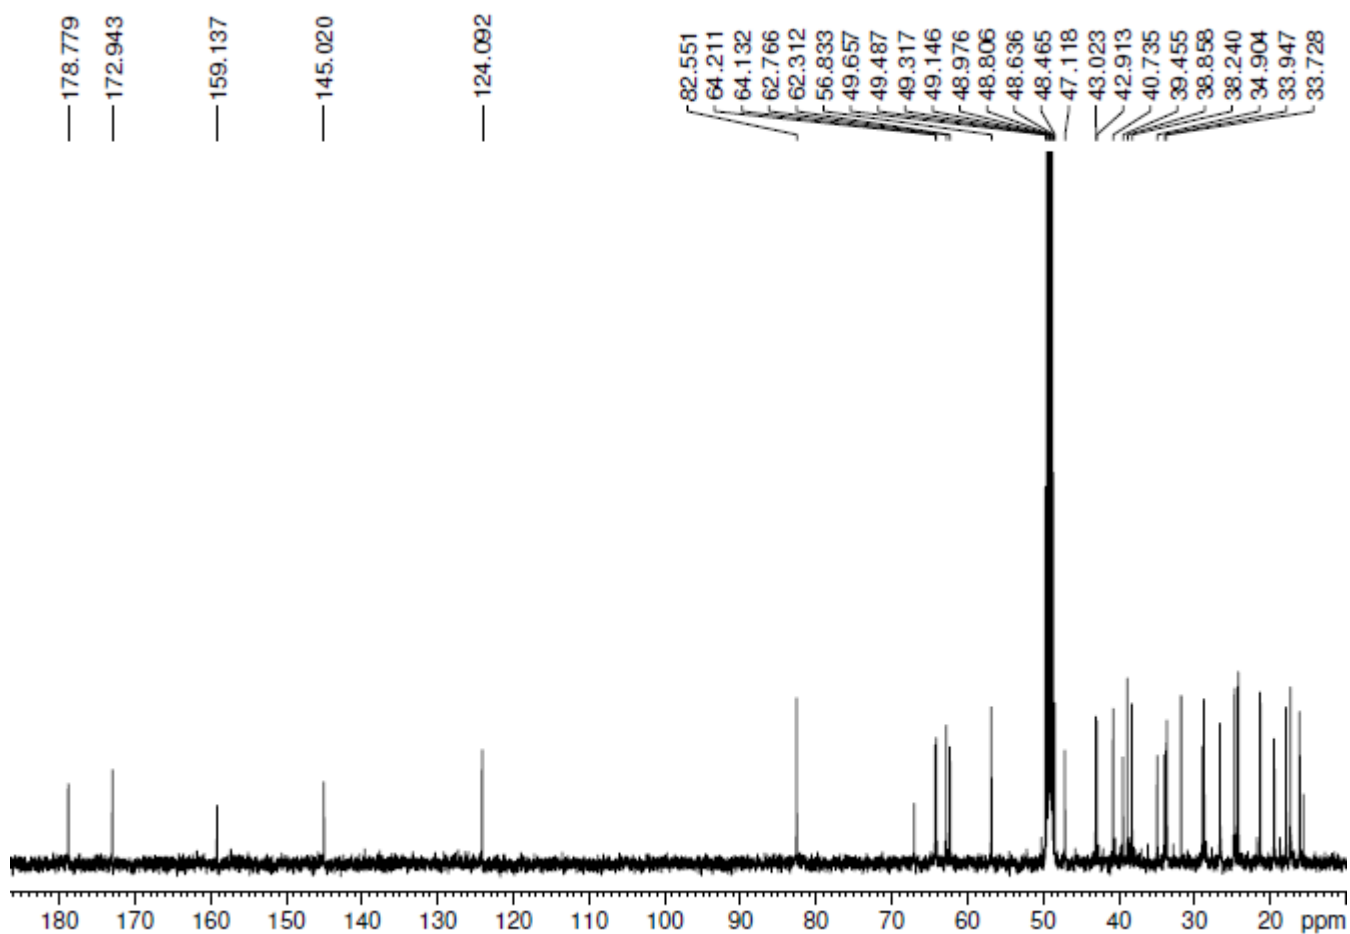

**3 $\beta$ -N-(4-buthylguanidine)-3-hydroxy-lupane-28-amide (14).**

<sup>1</sup>H NMR spectra (d<sub>6</sub>-DMSO)

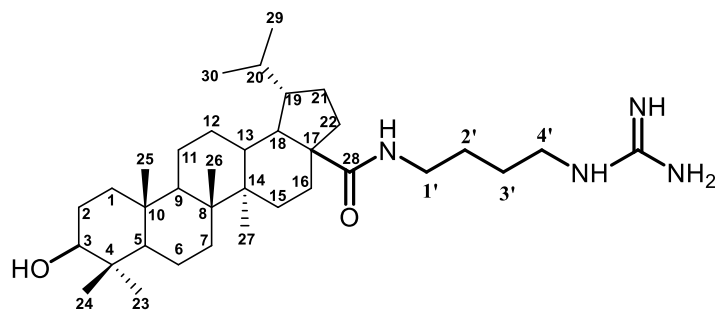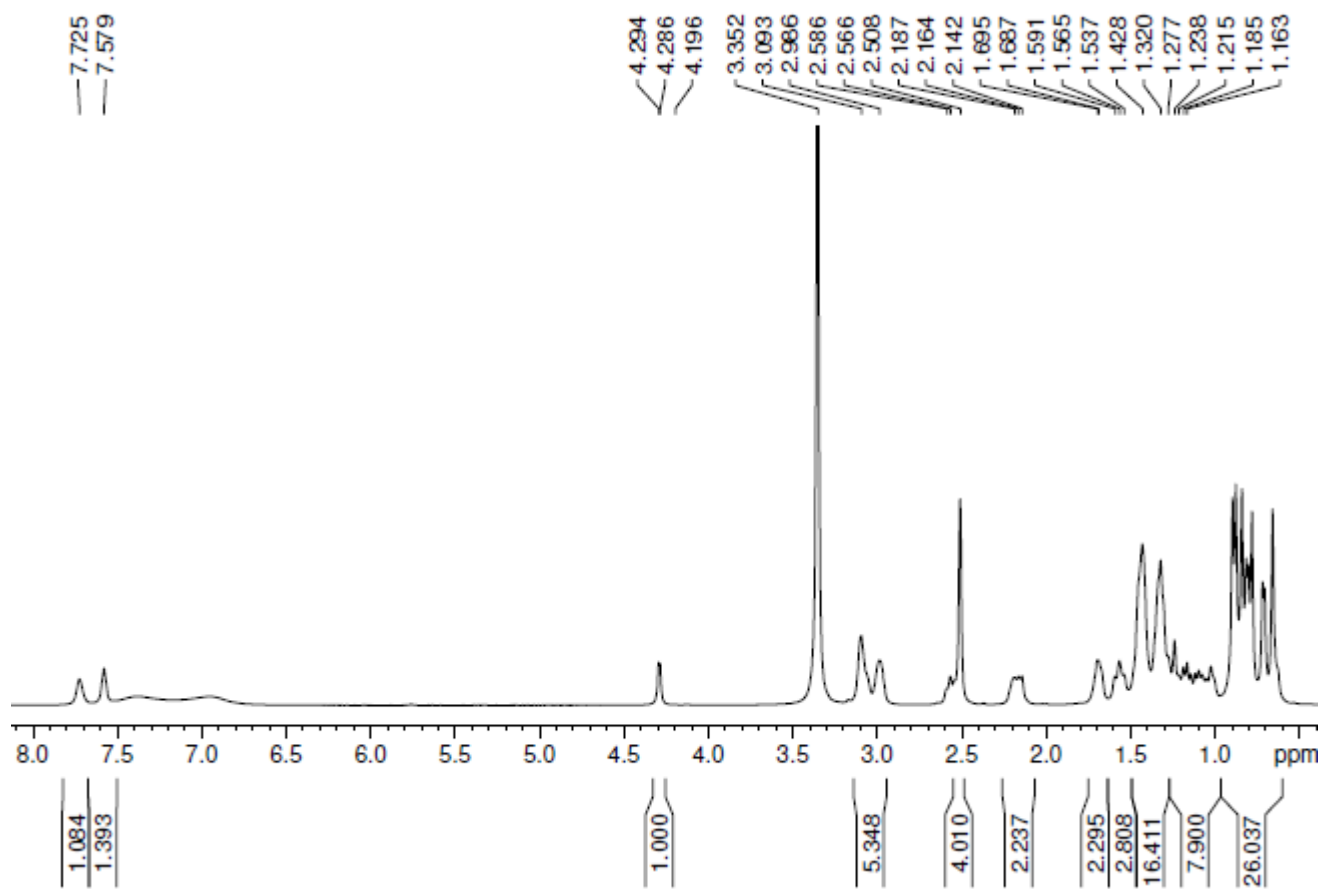

**3 $\beta$ -N-(4-buthylgyanidine)-3-hydroxy-lupane-28-amide (14).**

<sup>13</sup>C NMR spectra (d<sub>6</sub>-DMSO)

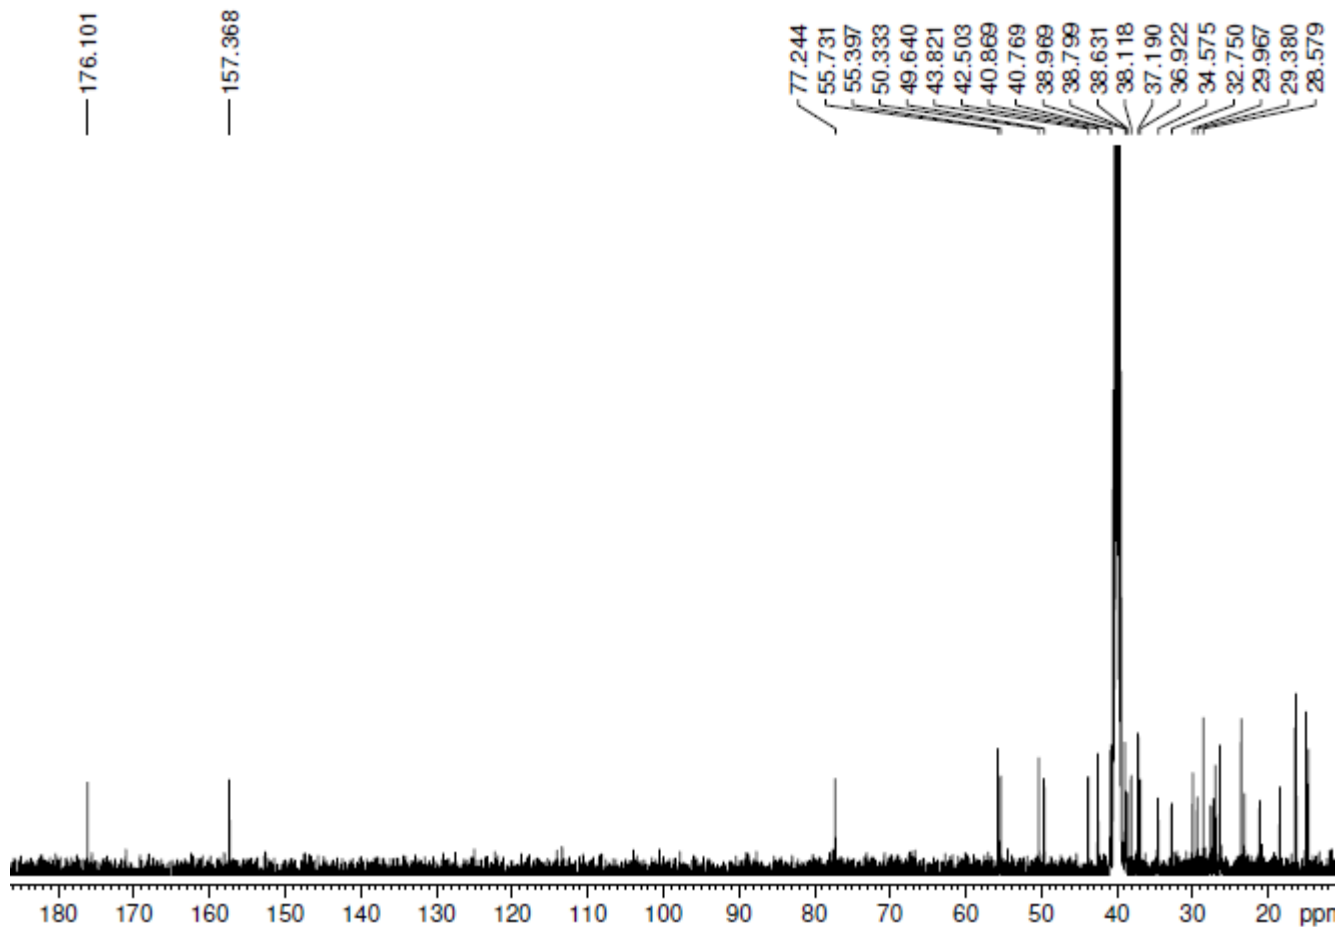

Supplement: molecules-23-03000-s001.pdf [file molecules-23-03000-s001.pdf]
